# Supplementary material for: An iron-catalyzed nitrene transfer reaction of nitrosobenzenes with N-acyloxyamides for accessing N-acyl azoxy molecules
Source: Royal Society of Chemistry journal article supplement (doi:10.1039/d4qo00137k), 2024-01-01

Supporting information for:

**Iron-Catalyzed Nitrene Transfer Reaction of Nitrosobenzenes with  
*N*-Acyloxyamides for Accessing *N*-Acyl Azoxy Molecules**

Weimin Huang, Haobo Yan, Qianqian Wang, Jianhui Chen,\* Yanshu Luo, and Yuanzhi Xia\*

College of Chemistry and Materials Engineering, Wenzhou University, Wenzhou 325035, China

\*E-mail: [cjh@wzu.edu.cn](mailto:cjh@wzu.edu.cn) (JC); [xyz@wzu.edu.cn](mailto:xyz@wzu.edu.cn) (YX)

**Table of Content:**

| Entry | Content                                                                                                                                  | Page |
|-------|------------------------------------------------------------------------------------------------------------------------------------------|------|
| I     | General Information                                                                                                                      | S2   |
| II    | Procedures for the Synthesis of Starting Materials                                                                                       | S2   |
| III   | Iron-Catalyzed Nitrene Transfer Reaction of Nitrosobenzenes with<br><i>N</i> -Acyloxyamides for Accessing <i>N</i> -Acyl Azoxy Molecules | S11  |
| IV    | Gram-scale Reaction                                                                                                                      | S28  |
| V     | Further Derivatizations                                                                                                                  | S28  |
| VI    | NMR Spectra                                                                                                                              | S30  |

## I. General Information

Unless otherwise noted, all the solvents and commercially available chemicals were used as received. NMR spectra were recorded on a Bruker-400 instrument or Bruker-500 instrument. <sup>1</sup>H NMR chemical shifts were referenced to tetramethylsilane signal (0 ppm), <sup>13</sup>C NMR chemical shifts were referenced to the solvent resonance (77.00 ppm, CDCl<sub>3</sub>). The following abbreviations (or combinations thereof) were used to explain multiplicities: s = singlet, d = doublet, t = triplet, m = multiplet, q = quadruplet. Melting points (M.p.) were obtained using WRS-1B melting point apparatus (Laboratory Devices, Shanghai Shengguang CO.; LTD.). High-resolution mass spectra (HRMS) were recorded on a Bruker micrTOF-Q II or an Agilent 6200 series TOF instrument. For reactions that require heating, an aluminium heating block was used as the heating source.

## II. Procedures for the Synthesis of Starting Materials

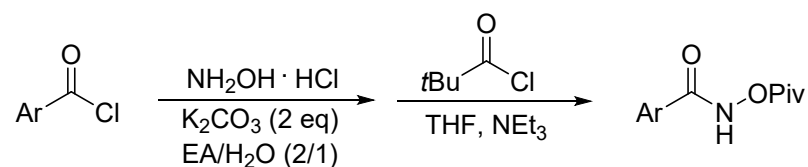

**General procedures for the synthesis of *N*-Acyloxyamides:** According to a previously reported method,<sup>1</sup> a 250 mL round bottom flask was charged with K<sub>2</sub>CO<sub>3</sub> (20 mmol, 2 equiv.), ethyl acetate (EA) (40 mL) and water (20 mL), added with hydroxylamine hydrochloride (20 mmol, 2 equiv.), cooled in an ice water bath, added drop wise with acyl chloride (10 mmol). Then the resulting solution was stirred at room temperature overnight. The organic phase was separated and the aqueous phase was extracted with EA (40 mL x 3). The combined organic layers were dried over anhydrous Na<sub>2</sub>SO<sub>4</sub>, filtered, and concentrated under reduced pressure. The crude hydroxamic acid were added with THF (40 mL) and Et<sub>3</sub>N (26 mmol, 1.3 equiv.), cooled in an ice water bath, then stirred for a while followed by dropwise addition of PivCl (10 mmol, 1 equiv). After stirring overnight, the reaction mixture was added with EA (40 mL), water (20 mL) and HCl (1 M, 1 mL). The organic layer was separated and dried over anhydrous Na<sub>2</sub>SO<sub>4</sub>, filtered and concentrated under reduced pressure. The residue was purified by column chromatography on silica gel (PE/EA) (8:1) to give the desired product *N*-acyloxyamides **1**.

<sup>1</sup> X. Zhang, B. Lin, J. Chen, J. Chen, Y. Luo, Y. Xia, *Org. Lett.*, 2021, **23**, 819.

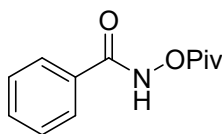

**N-(Pivaloyloxy)benzamide (1a).**<sup>1</sup> White solid was obtained by silica gel column chromatography with PE/EA (8:1). 4.3800 g, 19.7 mmol, 99% yield. <sup>1</sup>H NMR (400 MHz, CDCl<sub>3</sub>) δ 9.40 (br, 1H), 7.83-7.83 (m, 2H), 7.60-7.55 (m, 1H), 7.50-7.45 (m, 2H), 1.39 (s, 9H).

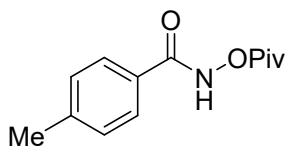

**4-Methyl-N-(pivaloyloxy)benzamide (1b).**<sup>1</sup> White solid was obtained by silica gel column chromatography with PE/EA (8:1). 2.3314 g, 8.9 mmol, 89% yield. <sup>1</sup>H NMR (400 MHz, CDCl<sub>3</sub>) δ 9.29 (br, 1H), 7.72 (d, *J* = 8.0 Hz, 2H), 7.26 (s, 2H), 2.41 (s, 3H), 1.37 (s, 9H).

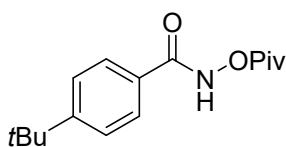

**4-(tert-butyl)-N-(pivaloyloxy)benzamide (1c).**<sup>2</sup> White solid was obtained by silica gel column chromatography with PE/EA (8:1). 2.6058 g, 9.4 mmol, 94% yield. <sup>1</sup>H NMR (400 MHz, CDCl<sub>3</sub>) δ 9.40 (br, 1H), 7.76 (d, *J* = 6.6 Hz, 2H), 7.47 (d, *J* = 6.6 Hz, 2H), 1.36 (s, 9H), 1.33 (s, 9H).

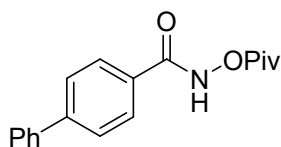

**N-(Pivaloyloxy)-[1,1'-biphenyl]-4-carboxamide (1d).**<sup>1</sup> White solid was obtained by silica gel column chromatography with PE/EA (8:1). 1.4553 g, 4.9 mmol, 49% yield. <sup>1</sup>H NMR (500 MHz, CDCl<sub>3</sub>) δ 9.60 (br, 1H), 7.88 (d, *J* = 8.0 Hz, 2H), 7.65 (d, *J* = 8.0 Hz, 2H), 7.58 (d, *J* = 7.5 Hz, 2H), 7.49-7.43 (m, 2H), 7.42-7.35 (m, 1H), 1.37 (s, 9H).

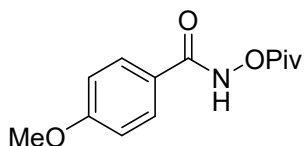

**4-Methoxy-N-(pivaloyloxy)benzamide (1e).**<sup>1</sup> White solid was obtained by silica gel column chromatography with PE/EA (8:1). 1.7892 g, 7.1 mmol, 71% yield. <sup>1</sup>H NMR (400 MHz, CDCl<sub>3</sub>) δ

<sup>2</sup> H. Wang, F. Glorius, *Angew. Chem. Int. Ed.*, 2012, **51**, 7318.

9.26 (br, 1H), 7.79 (d,  $J = 8.8$  Hz, 2H), 6.94 (d,  $J = 8.8$  Hz, 2H), 3.86 (s, 3H), 1.36 (s, 9H).

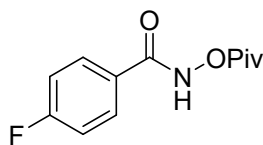

**4-Fluoro-*N*-(pivaloyloxy)benzamide (1f).**<sup>1</sup> White solid was obtained by silica gel column chromatography with PE/EA (8:1). 2.2601 g, 9.7 mmol, 97% yield. <sup>1</sup>H NMR (400 MHz, CDCl<sub>3</sub>)  $\delta$  9.36 (br, 1H), 7.85-7.82 (m, 2H), 7.16-7.12 (m, 2H), 1.39 (s, 9H).

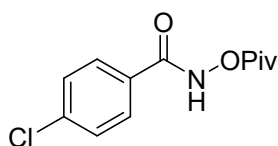

**4-Chloro-*N*-(pivaloyloxy)benzamide (1g).**<sup>2</sup> White solid was obtained by silica gel column chromatography with PE/EA (8:1). 2.0012 g, 7.8 mmol, 78% yield. <sup>1</sup>H NMR (500 MHz, CDCl<sub>3</sub>)  $\delta$  9.32 (br, 1H), 7.75 (d,  $J = 8.5$  Hz, 2H), 7.43 (d,  $J = 8.5$  Hz, 2H), 1.35 (s, 9H).

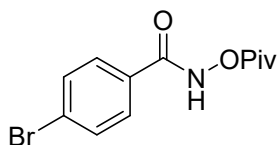

**4-Bromo-*N*-(pivaloyloxy)benzamide (1h).**<sup>1</sup> White solid was obtained by silica gel column chromatography with PE/EA (8:1). 2.4683 g, 8.22 mmol, 82% yield. <sup>1</sup>H NMR (400 MHz, CDCl<sub>3</sub>)  $\delta$  9.33 (br, 1H), 7.68 (d,  $J = 8.4$  Hz, 2H), 7.61 (d,  $J = 8.4$  Hz, 2H), 1.36 (s, 9H).

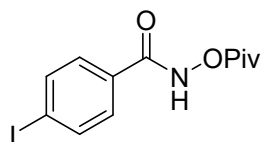

**4-Iodo-*N*-(pivaloyloxy)benzamide (1i).**<sup>1</sup> White solid was obtained by silica gel column chromatography with PE/EA (8:1). 3.0189 g, 8.7 mmol, 87% yield. <sup>1</sup>H NMR (400 MHz, CDCl<sub>3</sub>)  $\delta$  9.44 (s, 1H), 7.81 (d,  $J = 8.0$  Hz, 1H), 7.52 (d,  $J = 8.0$  Hz, 1H), 1.36 (s, 9H).

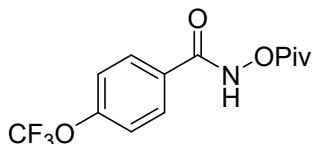

***N*-(pivaloyloxy)-4-(trifluoromethoxy)benzamide (1j).**<sup>1</sup> White solid was obtained by silica gel column chromatography with PE/EA (8:1). 1.6165 g, 5.3 mmol, 53% yield. <sup>1</sup>H NMR (400 MHz, CDCl<sub>3</sub>)  $\delta$  9.33 (s, 1H), 7.86 (d,  $J = 8.4$  Hz, 2H), 7.29 (d,  $J = 8.4$  Hz, 2H), 1.36 (s, 9H).

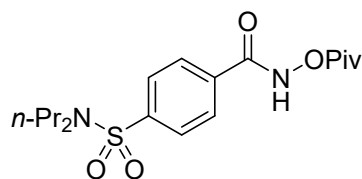

**4-(*N,N*-dipropylsulfamoyl)-*N*-(pivaloyloxy)benzamide (1k).**<sup>3</sup> Light yellow transparent oil was obtained by silica gel column chromatography with PE/EA (8:1). 0.4377 g, 2 mmol, 57% yield. <sup>1</sup>H NMR (400 MHz, CDCl<sub>3</sub>) δ 9.80 (br, 1H), 7.89 (d, *J* = 8.4 Hz, 2H), 7.82 (d, *J* = 8.4 Hz, 2H), 3.27-2.85 (m, 4H), 1.74-1.43 (m, 4H), 1.36 (s, 9H), 0.86 (t, *J* = 7.4 Hz, 6H).

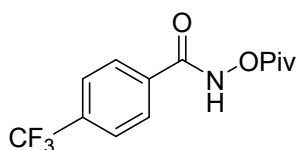

***N*-(pivaloyloxy)-4-(trifluoromethyl)benzamide (1l).**<sup>1</sup> White solid was obtained by silica gel column chromatography with PE/EA (8:1). 2.5653 g, 9.0 mmol, 90% yield. <sup>1</sup>H NMR (400 MHz, CDCl<sub>3</sub>) δ 9.35 (br, 1H), 7.93 (d, *J* = 8.0 Hz, 2H), 7.74 (d, *J* = 8.0 Hz, 2H), 1.37 (s, 9H).

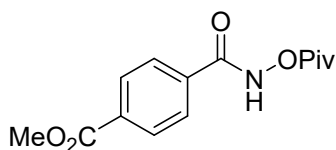

**4-((*Pivaloyloxy*)carbamoyl)phenyl acetate (1m).**<sup>2</sup> White solid was obtained by silica gel column chromatography with PE/EA (8:1). 0.8960 g, 3.2 mmol, 32% yield. <sup>1</sup>H NMR (500 MHz, CDCl<sub>3</sub>) δ 9.36 (s, 1H), 8.12 (s, 2H), 7.87 (d, *J* = 8.5 Hz, 2H), 3.95 (s, 3H), 1.37 (s, 9H).

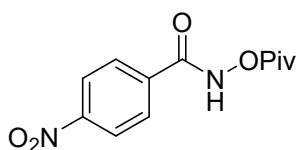

**4-Nitro-*N*-(pivaloyloxy)benzamide (1n).**<sup>1</sup> White solid was obtained by silica gel column chromatography with PE/EA (8:1). 2.0482 g, 7.7 mmol, 77% yield. <sup>1</sup>H NMR (400 MHz, CDCl<sub>3</sub>) δ 9.38 (br, 1H), 8.32 (d, *J* = 8.0 Hz, 2H), 7.99 (d, *J* = 8.0 Hz, 2H), 1.30 (s, 9H).

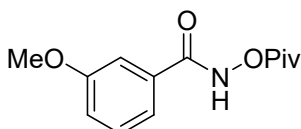

<sup>3</sup> R. Wang, Y. Chen, B. Fei, J. Hu, J. Chen, Y. Luo, Y. Xia, *Org. Lett.*, 2023, **25**, 2970-2974.

**3-Methoxy-*N*-(pivaloyloxy)benzamide (1o).**<sup>1</sup> White solid was obtained by silica gel column chromatography with PE/EA (8:1). 1.8581 g, 7.4 mmol, 74% yield. <sup>1</sup>H NMR (500 MHz, CDCl<sub>3</sub>) δ 9.63 (br, 1H), 7.35-7.27 (m, 3H), 7.17-6.94 (m, 1H), 3.82 (s, 3H), 1.35 (s, 9H).

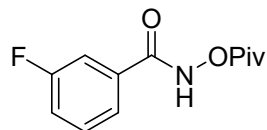

**3-Fluoro-*N*-(pivaloyloxy)benzamide (1p).**<sup>1</sup> White solid was obtained by silica gel column chromatography with PE/EA (8:1). 1.4914 g, 6.2 mmol, 62% yield. <sup>1</sup>H NMR (400 MHz, CDCl<sub>3</sub>) δ 9.57 (br, 1H), 7.59-7.49 (m, 2H), 7.44-7.39 (m, 1H), 7.28-7.24 (m, 1H), 1.35 (s, 9H).

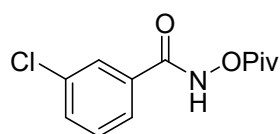

**3-Chloro-*N*-(pivaloyloxy)benzamide (1q).**<sup>1</sup> White solid was obtained by silica gel column chromatography with PE/EA (8:1). 1.2876 g, 5.1 mmol, 51% yield. <sup>1</sup>H NMR (400 MHz, CDCl<sub>3</sub>) δ 9.54 (br, 1H), 7.78 (s, 1H), 7.66 (d, *J* = 7.2 Hz, 1H), 7.52 (d, *J* = 8.0 Hz, 1H), 7.39 (d, *J* = 8.0 Hz, 1H), 1.35 (s, 9H).

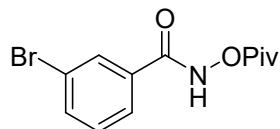

**3-Bromo-*N*-(pivaloyloxy)benzamide (1r).**<sup>1</sup> White solid was obtained by silica gel column chromatography with PE/EA (8:1). 2.3200 g, 10 mmol, 91% yield. <sup>1</sup>H NMR (400 MHz, CDCl<sub>3</sub>) δ 9.35 (br, 1H), 7.96 (s, 1H), 7.74-7.68 (m, 2H), 7.36-7.32 (m, 1H), 1.36 (s, 9H).

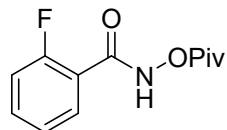

**2-Fluoro-*N*-(pivaloyloxy)benzamide (1s).**<sup>1</sup> White solid was obtained by silica gel column chromatography with PE/EA (8:1). 1.2582 g, 5.4 mmol, 54% yield. <sup>1</sup>H NMR (400 MHz, CDCl<sub>3</sub>) δ 9.82 (br, 1H), 8.12-8.08 (m, 1H), 7.57-7.52 (m, 1H), 7.33-7.29 (m, 1H), 7.20-7.15 (m, 1H), 1.38 (s, 9H).

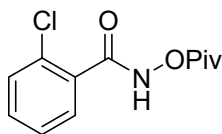

**2-Chloro-*N*-(pivaloyloxy)benzamide (1t).**<sup>1</sup> White solid was obtained by silica gel column chromatography with PE/EA (8:1). 1.9392 g, 7.4 mmol, 74% yield. <sup>1</sup>H NMR (500 MHz, CDCl<sub>3</sub>) δ 9.85 (br, 1H), 7.73 (s, 1H), 7.44 (s, 2H), 7.35 (s, 1H), 1.36 (s, 9H).

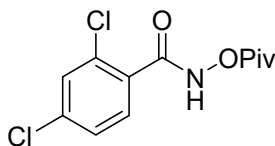

**2,4-Dichloro-*N*-(pivaloyloxy)benzamide (1u).**<sup>2</sup> White solid was obtained by silica gel column chromatography with PE/EA (8:1). 1.7408 g, 6.0 mmol, 60% yield. <sup>1</sup>H NMR (500 MHz, CDCl<sub>3</sub>) δ 9.59 (br, 1H), 7.67 (s, 1H), 7.46 (s, 1H), 7.27 (d, *J* = 8.5 Hz, 1H), 1.34 (s, 9H).

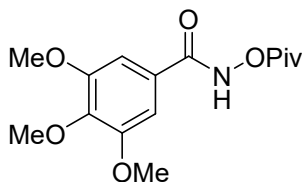

**3,4,5-trimethoxy-*N*-(pivaloyloxy)benzamide (1v).** White solid was obtained by silica gel column chromatography with PE/EA (8:1). 0.8547 g, 2.75 mmol, 69% yield. <sup>1</sup>H NMR (500 MHz, CDCl<sub>3</sub>) δ 9.55 (br, 1H), 7.05 (s, 2H), 3.89 (s, 9H), 1.37 (s, 9H).

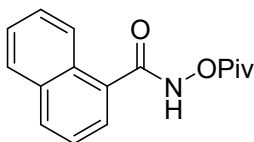

***N*-(pivaloyloxy)-1-naphthamide (1w).**<sup>2</sup> White solid was obtained by silica gel column chromatography with PE/EA (8:1). 1.8701 g, 6.9 mmol, 69% yield. <sup>1</sup>H NMR (500 MHz, CDCl<sub>3</sub>) δ 9.08 (br, 1H), 8.36 (d, *J* = 7.2 Hz, 1H), 7.98 (d, *J* = 7.6 Hz, 1H), 7.88 (d, *J* = 7.1 Hz, 1H), 7.76 (d, *J* = 5.8 Hz, 1H), 7.69-7.52 (m, 2H), 7.48 (d, *J* = 7.6 Hz, 1H), 1.38 (s, 9H).

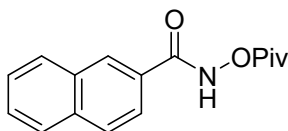

***N*-(pivaloyloxy)-2-naphthamide (1x).**<sup>2</sup> White solid was obtained by silica gel column chromatography with PE/EA (8:1). 1.9783 g, 7.3 mmol, 73% yield. <sup>1</sup>H NMR (400 MHz, CDCl<sub>3</sub>) δ 9.50 (br, 1H), 8.37 (s, 1H), 8.04-7.72 (m, 4H), 7.69-7.46 (m, 2H), 1.38 (s, 9H).

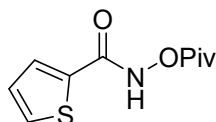

***N*-(pivaloyloxy)thiophene-2-carboxamide (1y).**<sup>2</sup> White solid was obtained by silica gel column chromatography with PE/EA (8:1). 1.1179 g, 4.9 mmol, 49% yield. <sup>1</sup>H NMR (400 MHz, CDCl<sub>3</sub>) δ 9.38 (br, 1H), 7.91-7.61 (m, 1H), 7.64-7.40 (m, 1H), 7.12-7.10 (m, 1H), 1.36 (s, 9H).

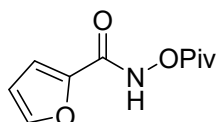

***N*-(pivaloyloxy)furan-2-carboxamide (1z).**<sup>1</sup> White solid was obtained by silica gel column chromatography with PE/EA (8:1). 1.3101 g, 6.2 mmol, 62% yield. <sup>1</sup>H NMR (400 MHz, CDCl<sub>3</sub>) δ 9.43 (br, 1H), 7.50 (s, 1H), 7.23 (d, *J* = 3.2 Hz, 1H), 6.55 (d, *J* = 1.6 Hz, 1H), 1.36 (s, 9H).

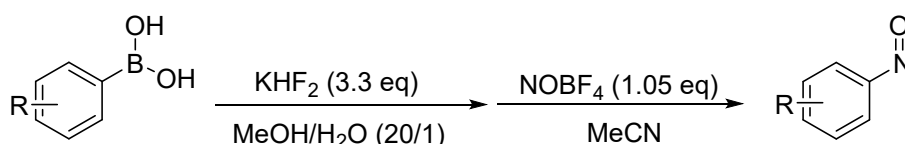

**General procedures for the synthesis of nitrosobenzene.** According to a previously reported method,<sup>4</sup> a 50 mL round bottom flask was charged with boronic acid (2 mmol, 1 eq) and MeOH (enough MeOH to give a free-flowing) under N<sub>2</sub>, added dropwisely with KHF<sub>2</sub> (6.6 M in H<sub>2</sub>O, 3.3 equiv) at 0 °C. Then the reaction was stirred at rt for 30 min, concentrated, and dissolved in a minimal amount of acetone (10 mL). The addition of Et<sub>2</sub>O (60 mL) led to the precipitation of the white solid. After filtration, crude organotrifluoroborates was obtained. Then a 50 mL round bottom flask was charged with crude organotrifluoroborate (2 mmol) in CH<sub>3</sub>CN (6 mL), added with NOBF<sub>4</sub> (2.1 mmol, 1.05 equiv.) in one portion. The reaction was stirred open to air at room temperature until the reaction mixture became homogeneous, added with H<sub>2</sub>O (40 mL) and CH<sub>2</sub>Cl<sub>2</sub> (20 mL). The resulted solution was separated, and the aqueous layer was extracted with CH<sub>2</sub>Cl<sub>2</sub> (3 x 20 mL). The combined organic layers were combined and dried over Na<sub>2</sub>SO<sub>4</sub>, filtered, and concentrated under reduced pressure. The residue was purified by column chromatography on silica gel (PE/EA) (20:1) to give the desired product nitrosobenzene **2**.

<sup>4</sup> G. Molander, L. Cavalcanti, *J. Org. Chem.*, 2012, **77**, 4402-4413.



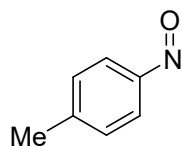

**1-Methyl-4-nitrosobenzene (2b).**<sup>4</sup> Green oil was obtained by silica gel column chromatography with PE/EA (10:1). 0.2033 g, 1.68 mmol, 84% yield. <sup>1</sup>H NMR (500 MHz, CDCl<sub>3</sub>) δ 7.80 (d, *J* = 8.0 Hz, 2H), 7.38 (d, *J* = 8.0 Hz, 2H), 2.44 (s, 3H).

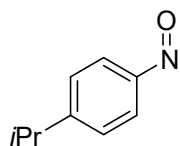

**1-Isopropyl-4-nitrosobenzene (2c).**<sup>4</sup> Green oil was obtained by silica gel column chromatography with PE/EA (10:1). 0.2525 g, 1.56 mmol, 78% yield. <sup>1</sup>H NMR (400 MHz, CDCl<sub>3</sub>) δ 7.86 (d, *J* = 8.0 Hz, 1H), 7.47 (d, *J* = 8.0 Hz, 1H), 3.25-2.75 (m, 1H), 1.31 (d, *J* = 8.9 Hz, 6H).

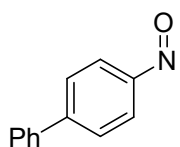

**4-Nitroso-1,1'-biphenyl (2d).**<sup>4</sup> Green solid was obtained by silica gel column chromatography with PE/EA (10:1). 0.3001 g, 1.84 mmol, 82% yield. <sup>1</sup>H NMR (400 MHz, CDCl<sub>3</sub>) δ 8.02 (d, *J* = 8.2 Hz, 2H), 7.86 (d, *J* = 8.2 Hz, 2H), 7.71 (d, *J* = 7.2 Hz, 2H), 7.56-7.51 (m, 2H), 7.49-7.47 (m, 1H).

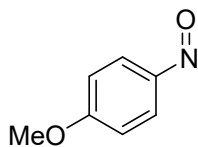

**1-Methoxy-4-nitrosobenzene (2e).**<sup>4</sup> Green oil was obtained by silica gel column chromatography with PE/EA (10:1). 0.2033 g, 1.68 mmol, 84% yield. <sup>1</sup>H NMR (400 MHz, CDCl<sub>3</sub>) δ 7.91 (s, 2H), 7.03 (d, *J* = 8.4 Hz, 2H), 3.96 (s, 3H).

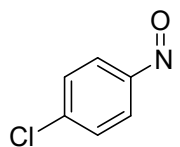

**1-Chloro-4-nitrosobenzene (2f).**<sup>4</sup> Yellow solid was obtained by silica gel column chromatography with PE/EA (10:1). 0.2452 g, 1.74 mmol, 87% yield. <sup>1</sup>H NMR (400 MHz, CDCl<sub>3</sub>) δ 7.86 (d, *J* = 8.8 Hz, 2H), 7.60 (d, *J* = 8.8 Hz, 2H).

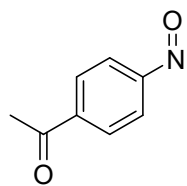

**1-(4-nitrosophenyl)ethan-1-one (2g).**<sup>4</sup> Yellow solid was obtained by silica gel column chromatography with PE/EA (10:1). 0.2712 g, 1.82 mmol, 91% yield. <sup>1</sup>H NMR (400 MHz, CDCl<sub>3</sub>) δ 8.20 (d, *J* = 6.8 Hz, 2H), 7.97 (d, *J* = 6.8 Hz, 2H), 2.70 (s, 3H).

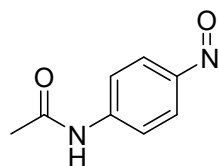

**N-(4-nitrosophenyl)acetamide (2h).**<sup>4</sup> Green solid was obtained by silica gel column chromatography with PE/EA (4:1). 0.2657 g, 1.62 mmol, 81% yield. <sup>1</sup>H NMR (400 MHz, DMSO-d<sub>6</sub>) δ 10.66 (br, 1H), 7.95-7.89 (m, 4H), 2.15 (s, 3H).

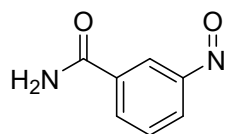

**3-Nitrosobenzamide (2i).**<sup>4</sup> Green solid was obtained by silica gel column chromatography with PE/EA (4:1). 0.2160 g, 1.44 mmol, 72% yield. <sup>1</sup>H NMR (400 MHz, DMSO-d<sub>6</sub>) δ 8.47 (br, 1H), 8.36 (d, *J* = 8.0 Hz, 2H), 8.07 (d, *J* = 8.0 Hz, 1H), 7.86 (d, *J* = 8.0 Hz, 1H), 7.72 (br, 1H).

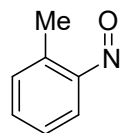

**1-Methoxy-2-nitrosobenzene (2j).**<sup>4</sup> Green oil was obtained by silica gel column chromatography with PE/EA (20:1). 0.1810 g, 1.5 mmol, 75% yield. <sup>1</sup>H NMR (500 MHz, CDCl<sub>3</sub>) δ 7.61-7.58 (m, 1H), 7.55 (d, *J* = 8.0 Hz, 1H), 7.17-7.14 (m, 1H), 6.29 (d, *J* = 8.0 Hz, 1H), 3.35 (s, 3H).

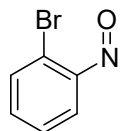

**1-Bromo-2-nitrosobenzene (2k).**<sup>4</sup> Green solid was obtained by silica gel column chromatography with PE/EA (20:1). 0.3275 g, 1.78 mmol, 89% yield. <sup>1</sup>H NMR (400 MHz, CDCl<sub>3</sub>) δ 7.60 (d, *J* = 8.0 Hz, 1H), 7.58-7.54 (m, 1H), 7.29 (d, *J* = 8.0 Hz, 1H), 6.28 (d, *J* = 8.0 Hz, 1H).

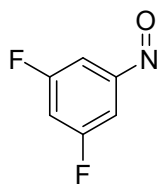

**2,4-Difluoro-1-nitrosobenzene (2l).**<sup>4</sup> Green solid was obtained by silica gel column chromatography with PE/EA (20:1). 0.2574 g, 1.8 mmol, 90% yield. <sup>1</sup>H NMR (500 MHz, CDCl<sub>3</sub>) δ 7.45 (d, *J* = 4.0 Hz, 2H), 7.22-7.19 (m, 1H).

### III. Iron-Catalyzed Nitrene Transfer Reaction of Nitrosobenzenes with *N*-Acyloxyamides for

#### Accessing *N*-Acyl Azoxy Molecules

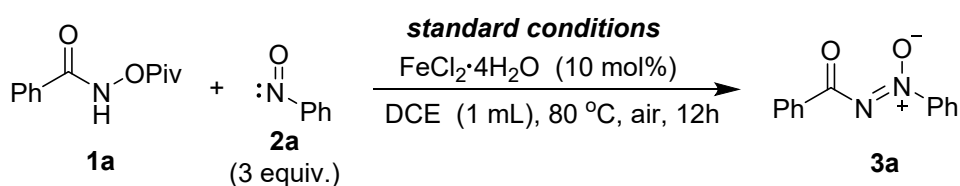

**General Procedures for Iron-Catalyzed Nitrene Transfer Reaction of Nitrosobenzene with *N*-Acyloxyamides:** To a 10 mL Schlenk flask under air atmosphere, **1a** (0.20 mmol), **2a** (0.60 mmol), FeCl<sub>2</sub>·4H<sub>2</sub>O (0.02 mmol, 10 mol%), 1,2-dichloroethane (1 mL) were added in sequence. After stirring at 80 °C for 12 h, the reaction mixture was diluted with EA filtered and concentrated under reduced pressure and concentrated and purified by silica gel PE/EA (10:1) flash column chromatography to give the desired product **3**.

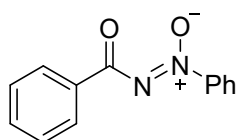

**(*Z*)-2-benzoyl-1-phenyldiazene 1-oxide (3a).** Prepared according to the general procedure using 0.0443 g (0.2 mmol) of **1a**, 0.0642 g (0.60 mmol) of **2a**, 0.0040 g (0.02 mmol) of FeCl<sub>2</sub>·4H<sub>2</sub>O and 1 mL of DCE. After stirring at 80 °C for 12 h, the reaction mixture was diluted with EA filtered and concentrated under reduced pressure. The resulted residue was purified by flash column chromatography on silica gel PE/EA (10:1) as the eluent to give 0.0402 g (0.18 mmol, 89% yield) of **3a** as a yellow oil. <sup>1</sup>H NMR (400 MHz, CDCl<sub>3</sub>) δ 8.30 (d, *J* = 8.0 Hz, 2H), 7.87 (d, *J* = 8.0 Hz, 2H), 7.66 (d, *J* = 7.2 Hz, 2H), 7.55 (d, *J* = 7.6 Hz, 2H), 7.28 (d, *J* = 8.0 Hz, 2H). <sup>13</sup>C NMR (101 MHz, CDCl<sub>3</sub>) δ 177.5, 146.4, 134.5, 133.4, 131.2, 129.5, 129.2, 129.1, 122.6.

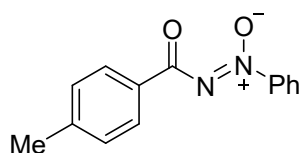

**(Z)-2-(4-methylbenzoyl)-1-phenyldiazene 1-oxide (3b).** Prepared according to the general procedure using 0.0470 g (0.2 mmol) of **1b**, 0.0639 g (0.60 mmol) of **2a**, 0.0039 g (0.02 mmol) of  $\text{FeCl}_2 \cdot 4\text{H}_2\text{O}$  and 1 mL of DCE. After stirring at 80 °C for 12 h, the reaction mixture was diluted with EA filtered and concentrated under reduced pressure. The resulted residue was purified by flash column chromatography on silica gel PE/EA (10:1) as the eluent to give 0.0307 g (0.13 mmol, 64% yield) of **3b** as a yellow oil.  $^1\text{H}$  NMR (400 MHz,  $\text{CDCl}_3$ )  $\delta$  8.30 (d,  $J = 8.2$  Hz, 2H), 7.87 (d,  $J = 8.0$  Hz, 2H), 7.68-7.64 (m, 1H), 7.57-7.53 (m, 2H), 7.28 (d,  $J = 8.0$  Hz, 2H), 2.42 (s, 3H).  $^{13}\text{C}$  NMR (101 MHz,  $\text{CDCl}_3$ )  $\delta$  177.4, 146.5, 145.7, 133.3, 129.8, 129.6, 129.2, 128.5, 122.6, 21.9. HRMS (ESI)  $m/z$ :  $[\text{M} + \text{H}]^+$  Calcd for  $\text{C}_{14}\text{H}_{12}\text{N}_2\text{O}_2$  241.0972, Found 241.0970.

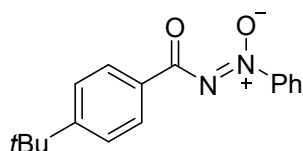

**(Z)-2-(4-(tert-butyl)benzoyl)-1-phenyldiazene 1-oxide (3c).** Prepared according to the general procedure using 0.0554 g (0.2 mmol) of **1c**, 0.0640 g (0.60 mmol) of **2a**, 0.0037 g (0.02 mmol) of  $\text{FeCl}_2 \cdot 4\text{H}_2\text{O}$  and 1 mL of DCE. After stirring at 80 °C for 12 h, the reaction mixture was diluted with EA filtered and concentrated under reduced pressure. The resulted residue was purified by flash column chromatography on silica gel PE/EA (10:1) as the eluent to give 0.0372 g (0.12 mmol, 66% yield) of **3c** as a yellow oil.  $^1\text{H}$  NMR (400 MHz,  $\text{CDCl}_3$ )  $\delta$  8.30 (d,  $J = 8.0$  Hz, 2H), 7.91 (d,  $J = 8.0$  Hz, 2H), 7.57-7.53 (m, 1H), 7.53-7.51 (m, 2H), 7.50 (d,  $J = 8.0$  Hz, 2H), 1.33 (s, 9H).  $^{13}\text{C}$  NMR (101 MHz,  $\text{CDCl}_3$ )  $\delta$  177.4, 158.6, 146.4, 133.3, 129.5, 129.2, 128.4, 126.1, 122.6, 35.4, 31.1. HRMS (ESI)  $m/z$ :  $[\text{M} + \text{H}]^+$  Calcd for  $\text{C}_{17}\text{H}_{19}\text{N}_2\text{O}_2$  283.1442, Found 283.1440.

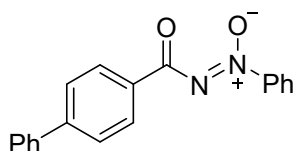

**(Z)-2-([1,1'-biphenyl]-4-carbonyl)-1-phenyldiazene 1-oxide (3d).** Prepared according to the general procedure using 0.0594 g (0.2 mmol) of **1d**, 0.0642 g (0.60 mmol) of **2a**, 0.0040 g (0.02 mmol) of  $\text{FeCl}_2 \cdot 4\text{H}_2\text{O}$  and 1 mL of DCE. After stirring at 80 °C for 12 h, the reaction mixture was diluted with EA filtered and concentrated under reduced pressure. The resulted residue was

purified by flash column chromatography on silica gel PE/EA (10:1) as the eluent to give 0.0327 g (0.11 mmol, 54% yield) of **3d** as a yellow oil.  $^1\text{H}$  NMR (500 MHz,  $\text{CDCl}_3$ )  $\delta$  8.33 (d,  $J = 7.5$  Hz, 2H), 8.05 (d,  $J = 8.5$  Hz, 2H), 7.71 (d,  $J = 8.5$  Hz, 2H), 7.68-7.65 (m, 1H), 7.61 (m, 2H), 7.60-7.57 (m, 2H), 7.52-7.43 (m, 1H), 7.42-7.39 (m, 1H).  $^{13}\text{C}$  NMR (101 MHz,  $\text{CDCl}_3$ )  $\delta$  177.3, 147.3, 146.5, 139.7, 133.4, 130.1, 129.9, 129.2, 129.1, 128.5, 127.7, 127.4, 122.7. HRMS (ESI)  $m/z$ :  $[\text{M} + \text{H}]^+$  Calcd for  $\text{C}_{19}\text{H}_{15}\text{N}_2\text{O}_2$  303.1129, Found 303.1133.

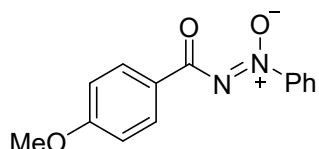

**(Z)-2-(4-methoxybenzoyl)-1-phenyldiazene 1-oxide (3e)**. Prepared according to the general procedure using 0.0502 g (0.2 mmol) of **1e**, 0.0642 g (0.60 mmol) of **2a**, 0.0040 g (0.02 mmol) of  $\text{FeCl}_2 \cdot 4\text{H}_2\text{O}$  and 1 mL of DCE. After stirring at 80 °C for 12 h, the reaction mixture was diluted with EA filtered and concentrated under reduced pressure. The resulted residue was purified by flash column chromatography on silica gel PE/EA (5:1) as the eluent to give 0.0327 g (0.17 mmol, 64% yield) of **3e** as a yellow solid.  $^1\text{H}$  NMR (400 MHz,  $\text{CDCl}_3$ )  $\delta$  8.30 (d,  $J = 7.6$  Hz, 2H), 7.95 (d,  $J = 9.0$  Hz, 2H), 7.82-7.60 (m, 1H), 7.56 (d,  $J = 7.6$  Hz, 2H), 6.96 (d,  $J = 9.0$  Hz, 2H), 3.88 (s, 3H).  $^{13}\text{C}$  NMR (101 MHz,  $\text{CDCl}_3$ )  $\delta$  176.6, 164.7, 146.5, 133.2, 131.9, 129.2, 123.8, 122.6, 114.4, 55.6. HRMS (ESI)  $m/z$ :  $[\text{M} + \text{Na}]^+$  Calcd for  $\text{C}_{14}\text{H}_{12}\text{N}_2\text{NaO}_3$  279.0741, Found 279.0746.

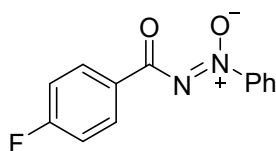

**(Z)-2-(4-fluorobenzoyl)-1-phenyldiazene 1-oxide (3f)**. Prepared according to the general procedure using 0.0478 g (0.2 mmol) of **1f**, 0.0642 g (0.60 mmol) of **2a**, 0.0039 g (0.02 mmol) of  $\text{FeCl}_2 \cdot 4\text{H}_2\text{O}$  and 1 mL of DCE. After stirring at 80 °C for 12 h, the reaction mixture was diluted with EA filtered and concentrated under reduced pressure. The resulted residue was purified by flash column chromatography on silica gel PE/EA (10:1) as the eluent to give 0.0405 g (0.17 mmol, 83% yield) of **3f** as a yellow oil.  $^1\text{H}$  NMR (500 MHz,  $\text{CDCl}_3$ )  $\delta$  8.30 (d,  $J = 8.4$  Hz, 2H), 8.03-8.01 (m, 2H), 7.69-7.66 (m, 1H), 7.58-7.55 (m, 2H), 7.15-7.18 (m, 2H).  $^{13}\text{C}$  NMR (126 MHz,  $\text{CDCl}_3$ )  $\delta$  176.1, 167.6, 165.6, 146.4, 133.5, 132.3 (d,  $J = 9.7$  Hz), 129.0, 127.7, 122.6, 116.4, (d,  $J = 22.4$  Hz).

$^{19}\text{F}$  NMR (471 MHz,  $\text{CDCl}_3$ )  $\delta$  -102.24. HRMS (ESI)  $m/z$ :  $[\text{M} + \text{H}]^+$  Calcd for  $\text{C}_{13}\text{H}_{10}\text{FN}_2\text{O}_2$  245.0721, Found 245.0721.

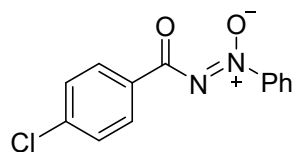

**(Z)-2-(4-chlorobenzoyl)-1-phenyldiazene 1-oxide (3g).** Prepared according to the general procedure using 0.0521 g (0.2 mmol) of **1g**, 0.0643 g (0.60 mmol) of **2a**, 0.0038 g (0.02 mmol) of  $\text{FeCl}_2 \cdot 4\text{H}_2\text{O}$  and 1 mL of DCE. After stirring at 80 °C for 12 h, the reaction mixture was diluted with EA filtered and concentrated under reduced pressure. The resulted residue was purified by flash column chromatography on silica gel PE/EA (10:1) as the eluent to give 0.0395 g (0.15 mmol, 76% yield) of **3g** as a yellow oil.  $^1\text{H}$  NMR (500 MHz,  $\text{CDCl}_3$ )  $\delta$  8.29 (d,  $J = 8.4$  Hz, 2H), 7.93 (d,  $J = 8.4$  Hz, 2H), 7.69-7.66 (m, 1H), 7.57-7.54 (m, 2H), 7.46 (d,  $J = 8.4$  Hz, 2H).  $^{13}\text{C}$  NMR (126 MHz,  $\text{CDCl}_3$ )  $\delta$  176.3, 146.4, 141.1, 133.5, 130.8, 129.8, 129.3, 122.6. HRMS (ESI)  $m/z$ :  $[\text{M} + \text{H}]^+$  Calcd for  $\text{C}_{13}\text{H}_{10}\text{ClN}_2\text{O}_2$  261.0426, Found 261.0421.

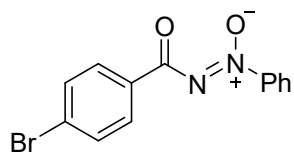

**(Z)-2-(4-bromobenzoyl)-1-phenyldiazene 1-oxide (3h).** Prepared according to the general procedure using 0.0600 g (0.2 mmol) of **1h**, 0.0645 g (0.60 mmol) of **2a**, 0.0040 g (0.02 mmol) of  $\text{FeCl}_2 \cdot 4\text{H}_2\text{O}$  and 1 mL of DCE. After stirring at 80 °C for 12 h, the reaction mixture was diluted with EA filtered and concentrated under reduced pressure. The resulted residue was purified by flash column chromatography on silica gel PE/EA (10:1) as the eluent to give 0.0387 g (0.128 mmol, 64% yield) of **3h** as a yellow solid.  $^1\text{H}$  NMR (500 MHz,  $\text{CDCl}_3$ )  $\delta$  8.29 (d,  $J = 8.0$  Hz, 1H), 7.85 (d,  $J = 8.0$  Hz, 1H), 7.69-7.66 (m, 1H), 7.62 (d,  $J = 8.0$  Hz, 1H), 7.58-7.55 (m, 1H).  $^{13}\text{C}$  NMR (101 MHz,  $\text{CDCl}_3$ )  $\delta$  176.5, 146.4, 133.6 132.4, 130.9, 130.2, 129.9, 129.3, 122.6. HRMS (ESI)  $m/z$ :  $[\text{M} + \text{Na}]^+$  Calcd for  $\text{C}_{13}\text{H}_9\text{BrN}_2\text{NaO}_2$  326.9740, Found 326.9741.

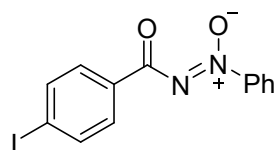

**(Z)-2-(4-iodobenzoyl)-1-phenyldiazene 1-oxide (3i).** Prepared according to the general procedure using 0.0769 g (0.2 mmol) of **1i**, 0.0642 g (0.60 mmol) of **2a**, 0.0040 g (0.02 mmol) of  $\text{FeCl}_2 \cdot 4\text{H}_2\text{O}$

and 1 mL of DCE. After stirring at 80 °C for 12 h, the reaction mixture was diluted with EA filtered and concentrated under reduced pressure. The resulted residue was purified by flash column chromatography on silica gel PE/EA (10:1) as the eluent to give 0.0395 g (0.11 mmol, 56% yield) of **3i** as a yellow oil. <sup>1</sup>H NMR (400 MHz, CDCl<sub>3</sub>) δ 8.32 (d, *J* = 8.0 Hz, 2H), 7.91 (d, *J* = 8.0 Hz, 2H), 7.74-7.71 (m, 3H), 7.62-7.59 (m, 2H). <sup>13</sup>C NMR (101 MHz, CDCl<sub>3</sub>) δ 176.9, 146.4, 138.4, 133.6, 130.7, 130.4, 129.2, 124.9, 122.6, 115.9. HRMS (ESI) *m/z*: [M + H]<sup>+</sup> Calcd for C<sub>13</sub>H<sub>10</sub>IN<sub>2</sub>O<sub>2</sub> 352.9782, Found 352.9788.

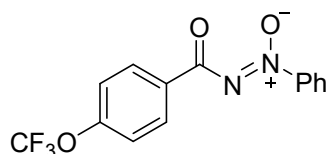

**(Z)-1-phenyl-2-(4-(trifluoromethoxy)benzoyl)diazene 1-oxide (3j)**. Prepared according to the general procedure using 0.0478 g (0.2 mmol) of **1j**, 0.0641 g (0.60 mmol) of **2a**, 0.0041 g (0.02 mmol) of FeCl<sub>2</sub>·4H<sub>2</sub>O and 1 mL of DCE. After stirring at 80 °C for 12 h, the reaction mixture was diluted with EA filtered and concentrated under reduced pressure. The resulted residue was purified by flash column chromatography on silica gel PE/EA (10:1) as the eluent to give 0.0256 g (0.08 mmol, 41% yield) of **3j** as a yellow solid. <sup>1</sup>H NMR (500 MHz, CDCl<sub>3</sub>) δ 8.30 (d, *J* = 8.0 Hz, 2H), 8.05 (d, *J* = 8.6 Hz, 2H), 7.70-7.67 (m, 1H), 7.59-7.56 (m, 2H), 7.32 (d, *J* = 8.0 Hz, 2H). <sup>13</sup>C NMR (126 MHz, CDCl<sub>3</sub>) δ 175.9, 153.6, 146.4, 133.5, 131.6, 129.6, 129.3, 122.6, 120.7 (q, *J* = 46.1 Hz). HRMS (ESI) *m/z*: [M + Na]<sup>+</sup> Calcd for C<sub>14</sub>H<sub>9</sub>F<sub>3</sub>N<sub>2</sub>NaO<sub>3</sub> 333.00458, Found 333.0461.

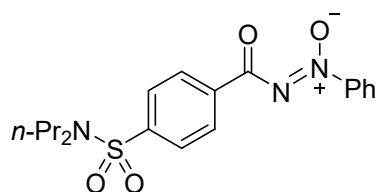

**(Z)-2-(4-(N,N-dipropylsulfamoyl)benzoyl)-1-phenyldiazene 1-oxide (3k)**. Prepared according to the general procedure using 0.0769 g (0.2 mmol) of **1k**, 0.0642 g (0.60 mmol) of **2a**, 0.0040 g (0.02 mmol) of FeCl<sub>2</sub>·4H<sub>2</sub>O and 1 mL of DCE. After stirring at 80 °C for 12 h, the reaction mixture was diluted with EA filtered and concentrated under reduced pressure. The resulted residue was purified by flash column chromatography on silica gel PE/EA (10:1) as the eluent to give 0.0326 g (0.20 mmol, 42% yield) of **3k** as a yellow oil. <sup>1</sup>H NMR (400 MHz, CDCl<sub>3</sub>) δ 8.31 (d, *J* = 8.0 Hz, 2H), 8.11 (d, *J* = 8.0 Hz, 2H), 8.02-7.84 (m, 2H), 7.69 (d, *J* = 8.0 Hz, 1H), 7.60-7.56 (m, 2H), 3.10 (t, *J* = 6.8 Hz, 4H), 1.56 (dd, *J* = 13.6, 7.2 Hz, 4H), 0.87 (t, *J* = 6.4 Hz, 6H). <sup>13</sup>C NMR (101 MHz,

CDCl<sub>3</sub>) δ 175.9, 146.4, 145.4, 134.1, 130.1, 129.4, 127.6, 122.6, 50.1, 22.0, 11.2. HRMS (ESI) m/z: [M + H]<sup>+</sup> Calcd for C<sub>19</sub>H<sub>24</sub>N<sub>3</sub>O<sub>4</sub>S 390.1483, Found 390.1484.

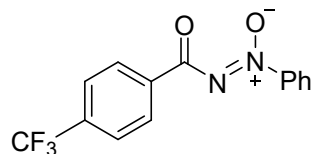

**(Z)-1-phenyl-2-(4-(trifluoromethyl)benzoyl)diazene 1-oxide (3l).** Prepared according to the general procedure using 0.0579 g (0.2 mmol) of **1l**, 0.0642 g (0.60 mmol) of **2a**, 0.0039 g (0.02 mmol) of FeCl<sub>2</sub>·4H<sub>2</sub>O and 1 mL of DCE. After stirring at 80 °C for 12 h, the reaction mixture was diluted with EA filtered and concentrated under reduced pressure. The resulted residue was purified by flash column chromatography on silica gel PE/EA (10:1) as the eluent to give 0.0329 g (0.11 mmol, 56% yield) of **3l** as a yellow solid. <sup>1</sup>H NMR (400 MHz, CDCl<sub>3</sub>) δ 8.31 (d, *J* = 8.0 Hz, 2H), 8.10 (d, *J* = 8.0 Hz, 2H), 7.76 (d, *J* = 8.0 Hz, 1H), 7.71-7.68 (m, 2H), 7.59-7.55 (m, 2H). <sup>13</sup>C NMR (126 MHz, CDCl<sub>3</sub>) δ 176.2, 146.3, 135.7, 135.6 (q, *J* = 32.8 Hz), 134.4, 133.7, 129.8, 129.3, 126.1 (q, *J* = 32.8 Hz), 124.5 (q, *J* = 32.8 Hz), 122.6. HRMS (ESI) m/z: [M + Na]<sup>+</sup> Calcd for C<sub>14</sub>H<sub>9</sub>F<sub>3</sub>N<sub>2</sub>NaO<sub>2</sub> 317.0509, Found 317.0511.

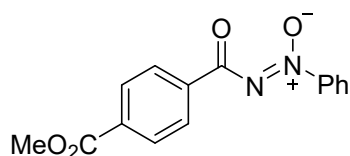

**(Z)-2-(4-(methoxycarbonyl)benzoyl)-1-phenyldiazene 1-oxide (3m).** Prepared according to the general procedure using 0.0533 g (0.2 mmol) of **1m**, 0.0640 g (0.60 mmol) of **2a**, 0.0040 g (0.02 mmol) of FeCl<sub>2</sub>·4H<sub>2</sub>O and 1 mL of DCE. After stirring at 80 °C for 12 h, the reaction mixture was diluted with EA filtered and concentrated under reduced pressure. The resulted residue was purified by flash column chromatography on silica gel PE/EA (5:1) as the eluent to give 0.0328 g (0.15 mmol, 75% yield) of **3m** as a yellow solid. <sup>1</sup>H NMR (500 MHz, DMSO-d<sub>6</sub>) δ 8.18 (d, *J* = 7.8 Hz, 2H), 8.02-7.97 (m, 4H), 7.71-7.69 (m, 1H), 7.60-7.57 (m, 2H), 3.77 (s, 3H). <sup>13</sup>C NMR (126 MHz, DMSO-d<sub>6</sub>) δ 177.2, 165.8, 146.1, 135.3, 134.6, 134.2, 130.6, 130.3, 130.0, 122.9, 53.1. HRMS (ESI) m/z: [M + Na]<sup>+</sup> Calcd for C<sub>15</sub>H<sub>12</sub>N<sub>2</sub>NaO<sub>4</sub> 307.0690, Found 307.0694.

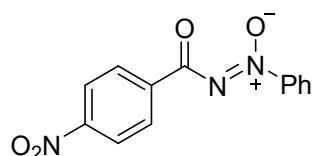



**(Z)-2-(4-nitrobenzoyl)-1-phenyldiazene 1-oxide (3n).** Prepared according to the general procedure using 0.0533 g (0.2 mmol) of **1n**, 0.0643 g (0.60 mmol) of **2a**, 0.0040 g (0.02 mmol) of  $\text{FeCl}_2 \cdot 4\text{H}_2\text{O}$  and 1 mL of DCE. After stirring at 80 °C for 12 h, the reaction mixture was diluted with EA filtered and concentrated under reduced pressure. The resulted residue was purified by flash column chromatography on silica gel PE/EA (10:1) as the eluent to give 0.0238 g (0.88 mmol, 44% yield) of **3n** as a yellow oil.  $^1\text{H}$  NMR (400 MHz,  $\text{CDCl}_3$ )  $\delta$  8.34-8.30 (m, 4H), 8.17 (d,  $J = 8.6$  Hz, 2H), 7.73-7.70 (m, 1H), 7.61-7.57 (m, 2H).  $^{13}\text{C}$  NMR (101 MHz,  $\text{CDCl}_3$ )  $\delta$  175.3, 151.1, 146.3, 136.5, 134.0, 130.5, 129.4, 124.2, 122.7. HRMS (ESI)  $m/z$ :  $[\text{M} + \text{H}]^+$  Calcd for  $\text{C}_{13}\text{H}_{10}\text{IN}_3\text{O}_4$  272.0666, Found 272.0666.

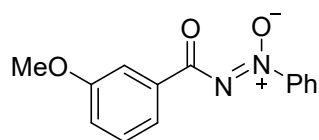

**(Z)-2-(3-methoxybenzoyl)-1-phenyldiazene 1-oxide (3o).** Prepared according to the general procedure using 0.0769 g (0.2 mmol) of **1o**, 0.0639 g (0.60 mmol) of **2a**, 0.0040 g (0.02 mmol) of  $\text{FeCl}_2 \cdot 4\text{H}_2\text{O}$  and 1 mL of DCE. After stirring at 80 °C for 12 h, the reaction mixture was diluted with EA filtered and concentrated under reduced pressure. The resulted residue was purified by flash column chromatography on silica gel PE/EA (10:1) as the eluent to give 0.0357 g (0.13 mmol, 64%) of **3o** as a yellow oil.  $^1\text{H}$  NMR (400 MHz,  $\text{CDCl}_3$ )  $\delta$  8.29 (d,  $J = 8.0$  Hz, 2H), 7.68-7.64 (m, 1H), 7.57-7.52 (m, 4H), 7.40-7.36 (m, 1H), 7.23-7.09 (m, 1H), 3.85 (s, 3H).  $^{13}\text{C}$  NMR (101 MHz,  $\text{CDCl}_3$ )  $\delta$  177.4, 160.1, 146.4, 133.4, 132.5, 130.1, 129.2, 122.6, 122.0, 121.2, 113.6, 55.6. HRMS (ESI)  $m/z$ :  $[\text{M} + \text{Na}]^+$  Calcd for  $\text{C}_{14}\text{H}_{12}\text{N}_2\text{NaO}_3$  279.0741, Found 279.0744.

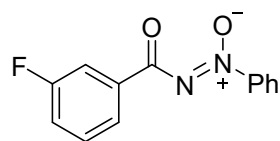

**(Z)-2-(3-fluorobenzoyl)-1-phenyldiazene 1-oxide (3p).** Prepared according to the general procedure using 0.0479 g (0.2 mmol) of **1p**, 0.0642 g (0.60 mmol) of **2a**, 0.0041 g (0.02 mmol) of  $\text{FeCl}_2 \cdot 4\text{H}_2\text{O}$  and 1 mL of DCE. After stirring at 80 °C for 12 h, the reaction mixture was diluted with EA filtered and concentrated under reduced pressure. The resulted residue was purified by flash column chromatography on silica gel PE/EA (10:1) as the eluent to give 0.0201 g (0.08 mmol, 41% yield) of **3p** as a yellow oil.  $^1\text{H}$  NMR (400 MHz,  $\text{CDCl}_3$ )  $\delta$  8.30 (d,  $J = 8.0$  Hz, 1H), 8.12 (s, 1H),

7.91 (d,  $J = 8.0$  Hz, 1H), 7.75 (d,  $J = 8.0$  Hz, 1H), 7.70-7.67 (m, 1H), 7.58-7.55 (m, 1H), 7.39-7.36 (m, 1H).  $^{13}\text{C}$  NMR (101 MHz,  $\text{CDCl}_3$ )  $\delta$  176.2, 164.1, 161.7, 146.4, 133.6, 130.7 (d,  $J = 7.7$  Hz), 129.3, 125.3 (d,  $J = 2.9$  Hz), 122.6, 121.6 (d,  $J = 23.0$  Hz), 116.2 (d,  $J = 23.0$  Hz).  $^{19}\text{F}$  NMR (471 MHz,  $\text{CDCl}_3$ )  $\delta$  -111.12. HRMS (ESI)  $m/z$ :  $[\text{M} + \text{H}]^+$  Calcd for  $\text{C}_{13}\text{H}_{10}\text{FN}_2\text{O}_2$  245.0721, Found 245.0724.

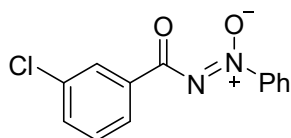

**(Z)-2-(3-chlorobenzoyl)-1-phenyldiazene 1-oxide (3q).** Prepared according to the general procedure using 0.0521 g (0.2 mmol) of **1q**, 0.0644 g (0.60 mmol) of **2a**, 0.0040 g (0.02 mmol) of  $\text{FeCl}_2 \cdot 4\text{H}_2\text{O}$  and 1 mL of DCE. After stirring at 80 °C for 12 h, the reaction mixture was diluted with EA filtered and concentrated under reduced pressure. The resulted residue was purified by flash column chromatography on silica gel PE/EA (10:1) as the eluent to give 0.0390 g (0.15 mmol, 75% yield) of **3q** as a yellow oil.  $^1\text{H}$  NMR (400 MHz,  $\text{CDCl}_3$ )  $\delta$  8.30 (d,  $J = 7.6$  Hz, 2H), 7.96 (s, 1H), 7.87 (d,  $J = 7.6$  Hz, 1H), 7.70-7.66 (m, 1H), 7.60-7.56 (m, 3H), 7.45-7.41 (m, 1H).  $^{13}\text{C}$  NMR (126 MHz,  $\text{CDCl}_3$ )  $\delta$  176.1, 146.4, 135.3, 134.4, 133.6, 133.1, 130.3, 129.4, 129.3, 127.5, 122.6. HRMS (ESI)  $m/z$ :  $[\text{M} + \text{H}]^+$  Calcd for  $\text{C}_{13}\text{H}_{10}\text{ClN}_2\text{O}_2$  261.0426, Found 261.0418.

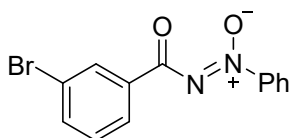

**(Z)-2-(3-bromobenzoyl)-1-phenyldiazene 1-oxide (3r).** Prepared according to the general procedure using 0.0600 g (0.2 mmol) of **1r**, 0.0642 g (0.60 mmol) of **2a**, 0.0038 g (0.02 mmol) of  $\text{FeCl}_2 \cdot 4\text{H}_2\text{O}$  and 1 mL of DCE. After stirring at 80 °C for 12 h, the reaction mixture was diluted with EA filtered and concentrated under reduced pressure. The resulted residue was purified by flash column chromatography on silica gel PE/EA (10:1) as the eluent to give 0.0390 g (0.13 mmol, 64% yield) of **3r** as a yellow solid.  $^1\text{H}$  NMR (400 MHz,  $\text{CDCl}_3$ )  $\delta$  8.30 (d,  $J = 8.0$  Hz, 2H), 8.12 (s, 1H), 7.92 (d,  $J = 8.0$  Hz, 1H), 7.75 (d,  $J = 8.0$  Hz, 1H), 7.70-7.67 (m, 1H), 7.59-7.55 (m, 2H), 7.39-7.35 (m, 1H).  $^{13}\text{C}$  NMR (101 MHz,  $\text{CDCl}_3$ )  $\delta$  176.3, 148.0, 134.8, 134.5, 132.0, 130.8, 129.9, 129.1, 128.4, 125.4, 114.6. HRMS (ESI)  $m/z$ :  $[\text{M} + \text{Na}]^+$  Calcd for  $\text{C}_{13}\text{H}_9\text{BrN}_2\text{NaO}_2$  327.9740, Found 327.9734.

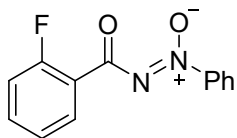

**(Z)-2-(2-fluorobenzoyl)-1-phenyldiazene 1-oxide (3s).** Prepared according to the general procedure using 0.0480 g (0.2 mmol) of **1s**, 0.0642 g (0.60 mmol) of **2a**, 0.0040 g (0.02 mmol) of  $\text{FeCl}_2 \cdot 4\text{H}_2\text{O}$  and 1 mL of DCE. After stirring at 80 °C for 12 h, the reaction mixture was diluted with EA filtered and concentrated under reduced pressure. The resulted residue was purified by flash column chromatography on silica gel PE/EA (10:1) as the eluent to give 0.0317 g (0.13 mmol, 65% yield) of **3s** as a yellow oil.  $^1\text{H}$  NMR (400 MHz,  $\text{CDCl}_3$ )  $\delta$  8.32 (d,  $J = 8.0$  Hz, 2H), 7.79 (d,  $J = 8.0$  Hz, 1H), 7.74-7.64 (m, 2H), 7.60-7.56 (m, 2H), 7.53-7.43 (m, 2H), 7.34 (d,  $J = 8.0$ , 1H).  $^{13}\text{C}$  NMR (101 MHz,  $\text{CDCl}_3$ )  $\delta$  176.2, 164.1, 161.7, 146.4, 133.5 (m), 130.8, 129.3, 125.2, 122.6, 121.7 (d,  $J = 7.7$  Hz), 116.2 (d,  $J = 7.7$  Hz).  $^{19}\text{F}$  NMR (471 MHz,  $\text{CDCl}_3$ )  $\delta$  -111.04. HRMS (ESI)  $m/z$ :  $[\text{M} + \text{Na}]^+$  Calcd for  $\text{C}_{13}\text{H}_9\text{FN}_2\text{NaO}_2$  267.0541, Found 267.0549.

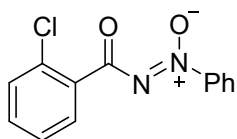

**(Z)-2-(2-chlorobenzoyl)-1-phenyldiazene 1-oxide (3t).** Prepared according to the general procedure using 0.0521 g (0.2 mmol) of **1t**, 0.0642 g (0.60 mmol) of **2a**, 0.0040 g (0.02 mmol) of  $\text{FeCl}_2 \cdot 4\text{H}_2\text{O}$  and 1 mL of DCE. After stirring at 80 °C for 12 h, the reaction mixture was diluted with EA filtered and concentrated under reduced pressure. The resulted residue was purified by flash column chromatography on silica gel PE/EA (10:1) as the eluent to give 0.0369 g (0.14 mmol, 71% yield) of **3t** as a yellow oil.  $^1\text{H}$  NMR (400 MHz,  $\text{CDCl}_3$ )  $\delta$  8.27 (d,  $J = 8.0$  Hz, 2H), 7.95 (d,  $J = 8.0$  Hz, 1H), 7.67-7.64 (m, 1H), 7.56-7.53 (m, 2H), 7.50-7.43 (m, 2H), 7.40-7.37 (m, 1H).  $^{13}\text{C}$  NMR (101 MHz,  $\text{CDCl}_3$ )  $\delta$  176.5, 146.3, 133.9, 133.4, 132.1, 131.3, 129.2, 127.1, 122.7. HRMS (ESI)  $m/z$ :  $[\text{M} + \text{H}]^+$  Calcd for  $\text{C}_{13}\text{H}_{10}\text{ClN}_2\text{O}_2$  261.0426, Found 261.0428.

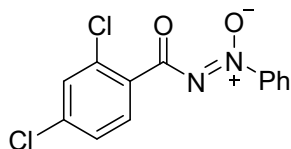

**(Z)-2-(2,4-dichlorobenzoyl)-1-phenyldiazene 1-oxide (3u).** Prepared according to the general procedure using 0.0578 g (0.2 mmol) of **1u**, 0.0642 g (0.60 mmol) of **2a**, 0.0039 g (0.02 mmol) of  $\text{FeCl}_2 \cdot 4\text{H}_2\text{O}$  and 1 mL of DCE. After stirring at 80 °C for 12 h, the reaction mixture was diluted with

EA filtered and concentrated under reduced pressure. The resulted residue was purified by flash column chromatography on silica gel PE/EA (10:1) as the eluent to give 0.0417 g (0.14 mmol, 71% yield) of **3u** as a yellow oil. <sup>1</sup>H NMR (400 MHz, CDCl<sub>3</sub>) δ 8.26 (d, *J* = 8.0 Hz, 2H), 7.91 (d, *J* = 8.0 Hz, 1H), 7.69-7.65 (m, 1H), 7.56-7.53 (m, 2H), 7.49 (s, 1H), 7.37 (d, *J* = 8.0 Hz, 1H). <sup>13</sup>C NMR (101 MHz, CDCl<sub>3</sub>) δ 175.5, 146.2, 139.9, 134.9, 133.6, 133.0, 131.2, 129.7, 129.2, 127.6, 122.7. HRMS (ESI) *m/z*: [M + Na]<sup>+</sup> Calcd for C<sub>13</sub>H<sub>8</sub>Cl<sub>2</sub>N<sub>2</sub>NaO<sub>2</sub> 316.9856, Found 316.9849.

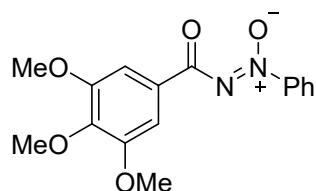

**(Z)-1-phenyl-2-(3,4,5-trimethoxybenzoyl)diazene 1-oxide (3v)**. Prepared according to the general procedure using 0.0543 g (0.2 mmol) of **1v**, 0.0641 g (0.60 mmol) of **2a**, 0.0040 g (0.02 mmol) of FeCl<sub>2</sub>·4H<sub>2</sub>O and 1 mL of DCE. After stirring at 80 °C for 12 h, the reaction mixture was diluted with EA filtered and concentrated under reduced pressure. The resulted residue was purified by flash column chromatography on silica gel PE/EA (10:1) as the eluent to give 0.0300 g (0.09 mmol, 47% yield) of **3v** as a yellow solid. <sup>1</sup>H NMR (500 MHz, CDCl<sub>3</sub>) δ 8.30 (d, *J* = 7.1 Hz, 2H), 7.68 (s, 1H), 7.58 (d, *J* = 6.7 Hz, 2H), 7.26 (s, 2H), 3.94 (s, 2H), 3.91 (s, 3H), 3.89 (s, 6H). <sup>13</sup>C NMR (126 MHz, CDCl<sub>3</sub>) δ 176.7, 153.5, 146.5, 144.0, 133.4, 129.3, 126.3, 122.6, 106.9, 61.0, 56.4. HRMS (ESI) *m/z*: [M + Na]<sup>+</sup> Calcd for C<sub>13</sub>H<sub>8</sub>Cl<sub>2</sub>N<sub>2</sub>NaO<sub>2</sub> 339.0952, Found 339.0949.

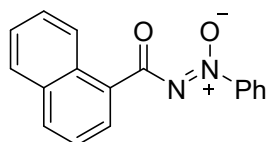

**(Z)-2-(1-naphthoyl)-1-phenyldiazene 1-oxide (3w)**. Prepared according to the general procedure using 0.0543 g (0.2 mmol) of **1w**, 0.0642 g (0.60 mmol) of **2a**, 0.0040 g (0.02 mmol) of FeCl<sub>2</sub>·4H<sub>2</sub>O and 1 mL of DCE. After stirring at 80 °C for 12 h, the reaction mixture was diluted with EA filtered and concentrated under reduced pressure. The resulted residue was purified by flash column chromatography on silica gel PE/EA (10:1) as the eluent to give 0.0159 g (0.06 mmol, 29% yield) of **3w** as a yellow solid. <sup>1</sup>H NMR (400 MHz, CDCl<sub>3</sub>) δ 9.14 (d, *J* = 8.4 Hz, 1H), 8.31 (d, *J* = 8.4 Hz, 2H), 8.10-8.07 (m, 2H), 7.92 (d, *J* = 8.4 Hz, 1H), 7.73-7.70 (m, 1H), 7.68-7.64 (m, 1H), 7.63-7.58 (m, 1H), 7.57-7.53 (m, 2H), 7.49-7.46 (m, 1H). <sup>13</sup>C NMR (126 MHz, CDCl<sub>3</sub>) δ 178.8, 146.3, 135.3,

134.0, 133.3, 131.3, 130.9, 129.2, 128.9, 128.8, 127.9, 126.9, 125.8, 124.5. HRMS (ESI)  $m/z$ :  $[M + H]^+$  Calcd for  $C_{17}H_{13}N_2O_2$  277.0972, Found 277.0966.

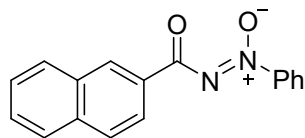

**(Z)-2-(2-naphthoyl)-1-phenyldiazene 1-oxide (3x).** Prepared according to the general procedure using 0.0543 g (0.2 mmol) of **1x**, 0.0639 g (0.60 mmol) of **2a**, 0.0040 g (0.02 mmol) of  $FeCl_2 \cdot 4H_2O$  and 1 mL of DCE. After stirring at 80 °C for 12 h, the reaction mixture was diluted with EA filtered and concentrated under reduced pressure. The resulted residue was purified by flash column chromatography on silica gel PE/EA (10:1) as the eluent to give 0.0308 g (0.12 mmol) of **3x** as a yellow oil.  $^1H$  NMR (400 MHz,  $CDCl_3$ )  $\delta$  8.50 (s, 1H), 8.35 (d,  $J = 8.0$  Hz, 2H), 8.04 (d,  $J = 8.5$  Hz, 1H), 7.93 (d,  $J = 8.5$  Hz, 2H), 7.88 (d,  $J = 8.0$  Hz, 1H), 7.70-7.67 (m, 1H), 7.65 -7.50 (m, 4H).  $^{13}C$  NMR (101 MHz,  $CDCl_3$ )  $\delta$  177.6, 146.5, 136.3, 133.4, 132.5, 131.7, 129.8, 129.3, 129.2, 129.1, 128.6, 128.0, 127.1, 124.4, 122.7. HRMS (ESI)  $m/z$ :  $[M + H]^+$  Calcd for  $C_{17}H_{13}N_2O_2$  277.0972, Found 277.0978.

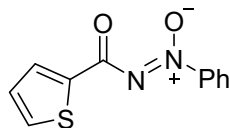

**(Z)-1-phenyl-2-(thiophene-2-carbonyl)diazene 1-oxide (3y).** Prepared according to the general procedure using 0.0455 g (0.2 mmol) of **1y**, 0.0644 g (0.60 mmol) of **2a**, 0.0040 g (0.02 mmol) of  $FeCl_2 \cdot 4H_2O$  and 1 mL of DCE. After stirring at 80 °C for 12 h, the reaction mixture was diluted with EA filtered and concentrated under reduced pressure. The resulted residue was purified by flash column chromatography on silica gel PE/EA (10:1) as the eluent to give 0.0343 g (0.15 mmol, 74% yield) of **3y** as a yellow oil.  $^1H$  NMR (400 MHz,  $CDCl_3$ )  $\delta$  8.29 (d,  $J = 8.0$ , 1H), 7.81 (d,  $J = 8.0$  Hz, 1H), 7.69-7.65 (m, 1H), 7.57-7.53 (m, 2H), 7.5 (s, 1H), 7.16 (d,  $J = 8.0$  Hz, 1H).  $^{13}C$  NMR (101 MHz,  $CDCl_3$ )  $\delta$  170.7, 146.7, 136.6, 135.4, 134.6, 133.5, 129.2, 128.6, 122.7. HRMS (ESI)  $m/z$ :  $[M + H]^+$  Calcd for  $C_{11}H_9N_2O_2S$  233.0380, Found 233.0380.

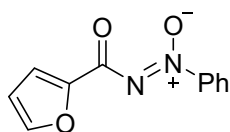

**(Z)-2-(furan-2-carbonyl)-1-phenyldiazene 1-oxide (3z).** Prepared according to the general procedure using 0.0423 g (0.2 mmol) of **1z**, 0.0642 g (0.60 mmol) of **2a**, 0.0040 g (0.02 mmol) of FeCl<sub>2</sub>·4H<sub>2</sub>O and 1 mL of DCE. After stirring at 80 °C for 12 h, the reaction mixture was diluted with EA filtered and concentrated under reduced pressure. The resulted residue was purified by flash column chromatography on silica gel PE/EA (10:1) as the eluent to give 0.0341 g (0.20 mmol, 79% yield) of **3z** as a yellow oil. <sup>1</sup>H NMR (500 MHz, CDCl<sub>3</sub>) δ 8.29 (d, *J* = 8.0 Hz, 2H), 7.66 (s, 2H), 7.57-7.54 (m, 2H), 7.34 (s, 1H), 7.27 (s, 1H). <sup>13</sup>C NMR (101 MHz, CDCl<sub>3</sub>) δ 166.7, 148.1, 146.9, 146.6, 133.5, 129.2, 122.7, 120.6, 112.8. HRMS (ESI) *m/z*: [M + H]<sup>+</sup> Calcd for C<sub>11</sub>H<sub>9</sub>N<sub>2</sub>O<sub>3</sub> 217.0608, Found 217.0609.

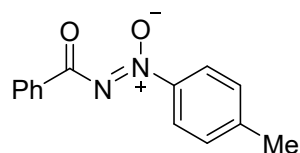

**(Z)-2-benzoyl-1-(p-tolyl) diazene 1-oxide (3aa).** Prepared according to the general procedure using 0.0443 g (0.2 mmol) of **1a**, 0.0727 g (0.60 mmol) of **2a**, 0.0040 g (0.02 mmol) of FeCl<sub>2</sub>·4H<sub>2</sub>O and 1 mL of DCE. After stirring at 80 °C for 12 h, the reaction mixture was diluted with EA filtered and concentrated under reduced pressure. The resulted residue was purified by flash column chromatography on silica gel PE/EA (10:1) as the eluent to give 0.0333 g (0.14 mmol, 69% yield) of **3aa** as a yellow oil. <sup>1</sup>H NMR (500 MHz, CDCl<sub>3</sub>) δ 8.19 (d, *J* = 8.4 Hz, 2H), 8.10-7.88 (m, 2H), 7.64-7.61 (m, 1H), 7.50-7.47 (m, 2H), 7.33 (d, *J* = 8.4 Hz, 2H), 2.48 (s, 3H). <sup>13</sup>C NMR (126 MHz, CDCl<sub>3</sub>) δ 177.6, 144.4, 134.4, 131.4, 129.7, 129.5, 129.0, 122.5, 21.5. HRMS (ESI) *m/z*: [M + Na]<sup>+</sup> Calcd for C<sub>14</sub>H<sub>12</sub>N<sub>2</sub>NaO<sub>2</sub> 263.0791, Found 263.0789.

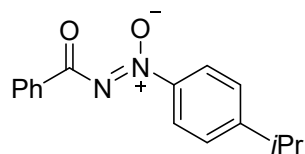

**(Z)-2-benzoyl-1-(4-isopropylphenyl) diazene 1-oxide (3ab).** Prepared according to the general procedure using 0.0442 g (0.2 mmol) of **1a**, 0.0896 g (0.60 mmol) of **2b**, 0.0040 g (0.02 mmol) of FeCl<sub>2</sub>·4H<sub>2</sub>O and 1 mL of DCE. After stirring at 80 °C for 12 h, the reaction mixture was diluted with EA filtered and concentrated under reduced pressure. The resulted residue was purified by flash column chromatography on silica gel PE/EA (10:1) as the eluent to give 0.0343 g (0.13 mmol, 64% yield) of **3ab** as a yellow oil. <sup>1</sup>H NMR (400 MHz, CDCl<sub>3</sub>) δ 8.22 (d, *J* = 8.0 Hz, 1H), 7.98 (d, *J* =

8.0 Hz, 1H), 7.64-7.61 (m, 1H), 7.50-7.47 (m, 1H), 7.39 (d,  $J = 8.0$  Hz, 1H), 3.04 (dt,  $J = 13.7, 6.8$  Hz, 1H), 1.31 (d,  $J = 6.8$  Hz, 6H).  $^{13}\text{C}$  NMR (101 MHz,  $\text{CDCl}_3$ )  $\delta$  177.6, 155.1, 134.4, 131.4, 129.5, 128.9, 127.2, 122.7, 34.2, 23.7. HRMS (ESI)  $m/z$ :  $[\text{M} + \text{Na}]^+$  Calcd for  $\text{C}_{16}\text{H}_{16}\text{N}_2\text{NaO}_2$  291.1104, Found 291.1099.

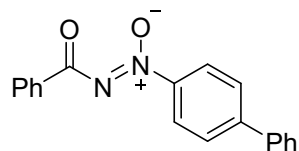

**(Z)-1-([1,1'-biphenyl]-4-yl)-2-benzoyldiazene 1-oxide (3ac).** Prepared according to the general procedure using 0.0442 g (0.2 mmol) of **1a**, 0.1086 g (0.60 mmol) of **2c**, 0.0040 g (0.02 mmol) of  $\text{FeCl}_2 \cdot 4\text{H}_2\text{O}$  and 1 mL of DCE. After stirring at 80 °C for 12 h, the reaction mixture was diluted with EA filtered and concentrated under reduced pressure. The resulted residue was purified by flash column chromatography on silica gel PE/EA (10:1) as the eluent to give 0.0336 g (0.20 mmol, 55% yield) of **3ac** as a yellow oil.  $^1\text{H}$  NMR (400 MHz,  $\text{CDCl}_3$ )  $\delta$  8.36 (d,  $J = 8.6$  Hz, 2H), 8.00 (d,  $J = 7.6$  Hz, 2H), 7.74 (d,  $J = 8.6$  Hz, 2H), 7.65-7.61 (m, 3H), 7.51-7.48 (m, 4H), 7.45-7.41 (m, 1H).  $^{13}\text{C}$  NMR (126 MHz,  $\text{CDCl}_3$ )  $\delta$  177.5, 146.4, 145.4, 139.1, 134.5, 131.3, 129.5, 129.1, 129.0, 128.7, 127.7, 127.4, 123.1. HRMS (ESI)  $m/z$ :  $[\text{M} + \text{H}]^+$  Calcd for  $\text{C}_{19}\text{H}_{15}\text{N}_2\text{O}_2$  303.1129, Found 303.1136.

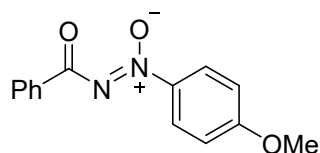

**(Z)-2-benzoyl-1-(4-methoxyphenyl) diazene 1-oxide (3ad).** Prepared according to the general procedure using 0.0442 g (0.2 mmol) of **1a**, 0.0822 g (0.60 mmol) of **2d**, 0.0040 g (0.02 mmol) of  $\text{FeCl}_2 \cdot 4\text{H}_2\text{O}$  and 1 mL of DCE. After stirring at 80 °C for 12 h, the reaction mixture was diluted with EA filtered and concentrated under reduced pressure. The resulted residue was purified by flash column chromatography on silica gel PE/EA (5:1) as the eluent to give 0.0390 g (0.20 mmol, 76% yield) of **3ad** as a yellow oil.  $^1\text{H}$  NMR (400 MHz,  $\text{CDCl}_3$ )  $\delta$  8.27 (d,  $J = 9.2$  Hz, 2H), 7.99 (d,  $J = 7.4$  Hz, 2H), 7.62-7.58 (m, 1H), 7.51-7.47 (m, 2H), 6.99 (d,  $J = 9.2$  Hz, 2H), 3.92 (s, 3H).  $^{13}\text{C}$  NMR (101 MHz,  $\text{CDCl}_3$ )  $\delta$  177.5, 163.7, 139.6, 134.4, 131.5, 129.5, 129.0, 124.6, 114.0, 55.9. HRMS (ESI)  $m/z$ :  $[\text{M} + \text{H}]^+$  Calcd for  $\text{C}_{14}\text{H}_{13}\text{N}_2\text{O}_3$  257.0921, Found 257.0924.

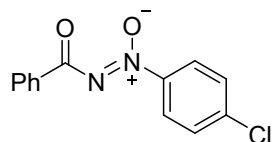

**(Z)-2-benzoyl-1-(4-chlorophenyl) diazene 1-oxide (3ae).** Prepared according to the general procedure using 0.0443 g (0.2 mmol) of **1a**, 0.0848 g (0.60 mmol) of **2e**, 0.0040 g (0.02 mmol) of  $\text{FeCl}_2 \cdot 4\text{H}_2\text{O}$  and 1 mL of DCE. After stirring at 80 °C for 12 h, the reaction mixture was diluted with EA filtered and concentrated under reduced pressure. The resulted residue was purified by flash column chromatography on silica gel PE/EA (10:1) as the eluent to give 0.0370 g (0.20 mmol, 71% yield) of **3ae** as a yellow oil.  $^1\text{H}$  NMR (400 MHz,  $\text{CDCl}_3$ )  $\delta$  8.25 (d,  $J = 9.6, 2.3$  Hz, 2H), 8.13-7.84 (m, 2H), 7.66-7.62 (m, 1H), 7.57-7.44 (m, 4H).  $^{13}\text{C}$  NMR (101 MHz,  $\text{CDCl}_3$ )  $\delta$  177.1, 144.8, 139.9, 134.7, 131.1, 129.5, 129.4, 129.1, 124.0. HRMS (ESI)  $m/z$ :  $[\text{M} + \text{Na}]^+$  Calcd for  $\text{C}_{13}\text{H}_9\text{ClN}_2\text{NaO}_2$  283.0245, Found 283.0244.

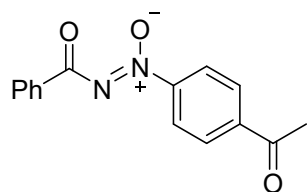

**(Z)-1-(4-acetylphenyl)-2-benzoyldiazene 1-oxide (3af).** Prepared according to the general procedure using 0.0444 g (0.2 mmol) of **1a**, 0.0896 g (0.60 mmol) of **2f**, 0.0040 g (0.02 mmol) of  $\text{FeCl}_2 \cdot 4\text{H}_2\text{O}$  and 1 mL of DCE. After stirring at 80 °C for 12 h, the reaction mixture was diluted with EA filtered and concentrated under reduced pressure. The resulted residue was purified by flash column chromatography on silica gel PE/EA (5:1) as the eluent to give 0.0407 g (0.20 mmol, 76% yield) of **3af** as a yellow oil.  $^1\text{H}$  NMR (500 MHz,  $\text{CDCl}_3$ )  $\delta$  8.39 (d,  $J = 8.4$  Hz, 2H), 8.12 (d,  $J = 8.4$  Hz, 2H), 7.98 (d,  $J = 8.4$  Hz, 2H), 7.66-7.63 (m, 1H), 7.52-7.49 (m, 2H), 2.69 (s, 3H).  $^{13}\text{C}$  NMR (126 MHz,  $\text{CDCl}_3$ )  $\delta$  196.4, 177.0, 149.0, 140.6, 134.7, 132.8, 129.5, 129.2, 129.1, 122.9, 26.9. HRMS (ESI)  $m/z$ :  $[\text{M} + \text{Na}]^+$  Calcd for  $\text{C}_{15}\text{H}_{12}\text{N}_2\text{NaO}_3$  291.0741, Found 291.0739.

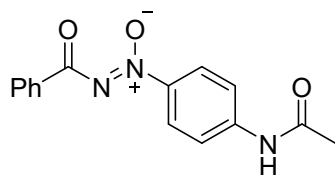

**(Z)-1-(4-acetamidophenyl)-2-benzoyldiazene 1-oxide (3ag).** Prepared according to the general procedure using 0.0442 g (0.2 mmol) of **1a**, 0.0984 g (0.60 mmol) of **2g**, 0.0040 g (0.02 mmol) of  $\text{FeCl}_2 \cdot 4\text{H}_2\text{O}$  and 1 mL of DCE. After stirring at 80 °C for 12 h, the reaction mixture was diluted with EA filtered and concentrated under reduced pressure. The resulted residue was purified by flash column chromatography on silica gel PE/EA (3:1) as the eluent to give 0.0442 g (0.20 mmol 78%



yield) of **3ag** as a yellow solid. <sup>1</sup>H NMR (400 MHz, CDCl<sub>3</sub>) δ 8.23 (d, *J* = 9.1 Hz, 2H), 7.98 (d, *J* = 7.4 Hz, 2H), 7.85 (br, 1H), 7.70 (d, *J* = 9.1 Hz, 2H), 7.62 (d, *J* = 7.4 Hz, 1H), 7.51-7.46 (m, 2H), 2.24 (s, 3H). <sup>13</sup>C NMR (126 MHz, CDCl<sub>3</sub>) δ 174.2, 169.4, 135.5, 133.4, 132.2, 132.0, 129.3, 128.6, 128.1, 127.4, 41.8. HRMS (ESI) *m/z*: [M + Na]<sup>+</sup> Calcd for C<sub>15</sub>H<sub>13</sub>N<sub>3</sub>NaO<sub>3</sub> 306.0850, Found 306.0849.

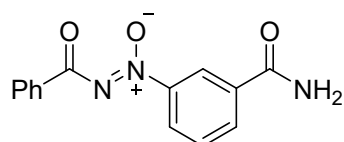

**(Z)-2-benzoyl-1-(3-carbamoylphenyl)diazene 1-oxide (3ah)**. Prepared according to the general procedure using 0.0442 g (0.2 mmol) of **1a**, 0.0902 g (0.60 mmol) of **2h**, 0.0040 g (0.02 mmol) of FeCl<sub>2</sub>·4H<sub>2</sub>O and 1 mL of DCE. After stirring at 80 °C for 12 h, the reaction mixture was diluted with EA filtered and concentrated under reduced pressure. The resulted residue was purified by flash column chromatography on silica gel PE/EA (2:1) as the eluent to give 0.0420 g (0.20 mmol, 78% yield) of **3ah** as a yellow solid. <sup>1</sup>H NMR (400 MHz, CDCl<sub>3</sub>) δ 8.73 (s, 1H), 8.42 (d, *J* = 8.0 Hz, 1H), 8.17 (d, *J* = 8.0 Hz, 1H), 7.96 (d, *J* = 8.0 Hz, 2H), 7.66-7.62 (m, 2H), 7.51-7.45 (m, 2H), 6.65 (br, 1H), 6.36 (br, 1H). <sup>13</sup>C NMR (126 MHz, CDCl<sub>3</sub>) δ 179, 167.6, 146.5, 134.8, 132.4, 130.9, 130.1, 129.8, 129.5, 129.1, 128.4, 125.8, 121.4, 121.4. HRMS (ESI) *m/z*: [M + Na]<sup>+</sup> Calcd for C<sub>14</sub>H<sub>11</sub>N<sub>3</sub>NaO<sub>3</sub> 292.0693, Found 292.0699.

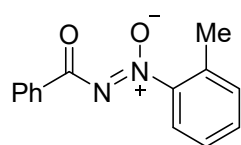

**(Z)-2-benzoyl-1-(2-methoxyphenyl)diazene 1-oxide (3ai)**. Prepared according to the general procedure using 0.0442 g (0.2 mmol) of **1a**, 0.0902 g (0.60 mmol) of **2i**, 0.0040 g (0.02 mmol) of FeCl<sub>2</sub>·4H<sub>2</sub>O and 1 mL of DCE. After stirring at 80 °C for 12 h, the reaction mixture was diluted with EA filtered and concentrated under reduced pressure. The resulted residue was purified by flash column chromatography on silica gel PE/EA (10:1) as the eluent to give 0.0389 g (0.16 mmol, 81% yield) of **3ai** as a yellow oil. <sup>1</sup>H NMR (500 MHz, CDCl<sub>3</sub>) δ 8.05-7.97 (m, 2H), 7.86 (d, *J* = 7.7 Hz, 1H), 7.72-7.60 (m, 1H), 7.53-7.50 (m, 2H), 7.48-7.45 (m, 1H), 7.37-7.35 (m, 2H), 2.58 (s, 3H). <sup>13</sup>C NMR (126 MHz, CDCl<sub>3</sub>) δ 177.0, 147.6, 134.5, 132.3, 131.4, 129.5, 129.0, 126.8, 123.8, 19.0. HRMS (ESI) *m/z*: [M + H]<sup>+</sup> Calcd for C<sub>14</sub>H<sub>13</sub>N<sub>2</sub>O<sub>2</sub> 241.0972, Found 241.0974.

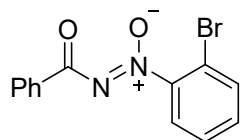

**(Z)-2-benzoyl-1-(2-bromophenyl)diazene 1-oxide (3aj).** Prepared according to the general procedure using 0.0443 g (0.2 mmol) of **1a**, 0.1122 g (0.60 mmol) of **2j**, 0.0040 g (0.02 mmol) of  $\text{FeCl}_2 \cdot 4\text{H}_2\text{O}$  and 1 mL of DCE. After stirring at 80 °C for 12 h, the reaction mixture was diluted with EA filtered and concentrated under reduced pressure. The resulted residue was purified by flash column chromatography on silica gel PE/EA (10:1) as the eluent to give 0.0515 g (0.20 mmol, 85% yield) of **3aj** as a yellow solid.  $^1\text{H}$  NMR (400 MHz,  $\text{CDCl}_3$ )  $\delta$  8.11 (d,  $J = 7.6$  Hz, 2H), 7.79 (d,  $J = 7.6$  Hz, 1H), 7.75 (d,  $J = 8.0$  Hz, 1H), 7.68-7.66 (m, 1H), 7.51-7.47 (m, 3H), 7.43-7.39 (m, 1H).  $^{13}\text{C}$  NMR (101 MHz,  $\text{CDCl}_3$ )  $\delta$  176.3, 148.0, 134.8, 134.5, 132.0, 130.8, 129.9, 129.1, 128.4, 125.4, 114.6. HRMS (ESI)  $m/z$ :  $[\text{M} + \text{Na}]^+$  Calcd for  $\text{C}_{13}\text{H}_9\text{BrN}_2\text{NaO}_2$  326.9740, Found 326.9739.

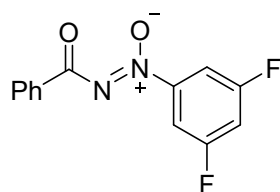

**(Z)-2-benzoyl-1-(2,4-difluorophenyl)diazene 1-oxide (3ak).** Prepared according to the general procedure using 0.0443 g (0.2 mmol) of **1a**, 0.0858 g (0.60 mmol) of **2k**, 0.0040 g (0.02 mmol) of  $\text{FeCl}_2 \cdot 4\text{H}_2\text{O}$  and 1 mL of DCE. After stirring at 80 °C for 12 h, the reaction mixture was diluted with EA filtered and concentrated under reduced pressure. The resulted residue was purified by flash column chromatography on silica gel PE/EA (10:1) as the eluent to give 0.0221 g (0.20 mmol, 42% yield) of **3ak** as a yellow oil.  $^1\text{H}$  NMR (500 MHz,  $\text{CDCl}_3$ )  $\delta$  8.10 (s, 1H), 7.82 (d,  $J = 7.6$  Hz, 2H), 7.57-7.54 (m, 1H), 7.49-7.46 (m, 2H), 7.27 (d,  $J = 8.0$  Hz, 2H), 6.61-6.57 (m, 1H).  $^{13}\text{C}$  NMR (126 MHz, DMSO)  $\delta$  161.2, 159.5 (d,  $J = 14.5$  Hz), 157.5 (d,  $J = 14.5$  Hz), 135.4 (t,  $J = 13.4$  Hz), 129.5, 127.6, 124.2, 122.3, 98.5 (d,  $J = 8.0$  Hz), 98.4 (d,  $J = 8.0$  Hz), 95.0 (t,  $J = 25.6$  Hz). HRMS (ESI)  $m/z$ :  $[\text{M} + \text{Na}]^+$  Calcd for  $\text{C}_{13}\text{H}_8\text{F}_2\text{N}_2\text{NaO}_2$  285.0447, Found 285.0450.

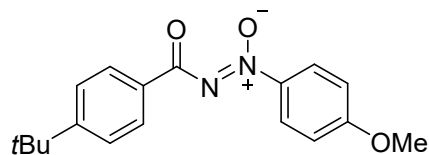

**(Z)-2-(4-(tert-butyl)benzoyl)-1-(4-methoxyphenyl)diazene 1-oxide (3al).** Prepared according to the general procedure using 0.0594 g (0.2 mmol) of **1d**, 0.0822 g (0.60 mmol) of **2d**, 0.0040 g (0.02

mmol) of  $\text{FeCl}_2 \cdot 4\text{H}_2\text{O}$  and 1 mL of DCE. After stirring at 80 °C for 12 h, the reaction mixture was diluted with EA filtered and concentrated under reduced pressure. The resulted residue was purified by flash column chromatography on silica gel PE/EA (5:1) as the eluent to give 0.0518 g (0.20 mmol, 83% yield) of **3a** as a yellow oil.  $^1\text{H}$  NMR (400 MHz,  $\text{CDCl}_3$ )  $\delta$  8.26 (d,  $J = 8.4$  Hz, 2H), 7.91 (d,  $J = 7.2$  Hz, 2H), 7.49 (d,  $J = 7.2$  Hz, 2H), 6.98 (d,  $J = 8.4$  Hz, 2H), 3.90 (s, 3H), 1.33 (s, 9H).  $^{13}\text{C}$  NMR (126 MHz,  $\text{CDCl}_3$ )  $\delta$  163.6, 158.3, 129.4, 126.0, 124.6, 114.0, 55.8, 35.3, 31.0. HRMS (ESI)  $m/z$ :  $[\text{M} + \text{H}]^+$  Calcd for  $\text{C}_{18}\text{H}_{21}\text{N}_2\text{O}_3$  313.1547, Found 313.1547.

#### Substrate scope of *N*-OR amides.

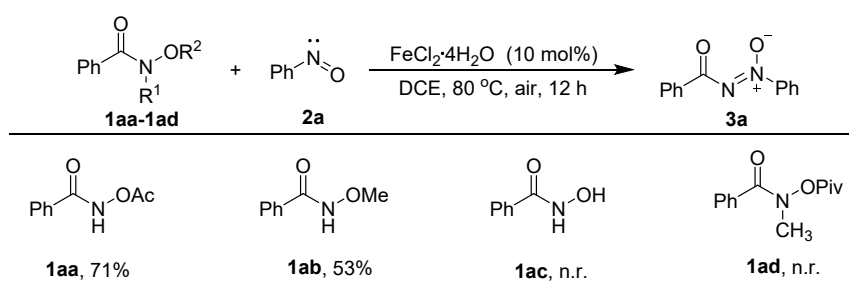

Prepared according to the general procedure using 0.0358 g (0.2 mmol) of **1aa**, 0.0642 g (0.60 mmol) of **2a**, 0.0040 g (0.02 mmol) of  $\text{FeCl}_2 \cdot 4\text{H}_2\text{O}$  and 1 mL of DCE. After stirring at 80 °C for 12 h, the reaction mixture was diluted with EA, filtered, and concentrated under reduced pressure. The resulted residue was purified by flash column chromatography on silica gel PE/EA (10:1) as the eluent to give 0.0321 g (0.14 mmol, 71% yield) of **3a** as a yellow oil.

Prepared according to the general procedure using 0.0302 g (0.2 mmol) of **1ab**, 0.0642 g (0.60 mmol) of **2a**, 0.0040 g (0.02 mmol) of  $\text{FeCl}_2 \cdot 4\text{H}_2\text{O}$  and 1 mL of DCE. After stirring at 80 °C for 12 h, added with EA (5 mL) to dilute, the reaction mixture was diluted with EA, filtered, and concentrated under reduced pressure. The resulted residue was purified by flash column chromatography on silica gel PE/EA (1:10) as the eluent to give 0.0240 g (0.14 mmol, 53% yield) of **3a** as a yellow oil.

Prepared according to the general procedure using 0.0275 g (0.2 mmol) of **1ac**, 0.0642 g (0.60 mmol) of **2a**, 0.0040 g (0.02 mmol) of  $\text{FeCl}_2 \cdot 4\text{H}_2\text{O}$  and 1 mL of DCE. After stirring at 80 °C for 12 h. the reaction was monitored by  $^1\text{H}$  NMR and no desired product was observed.

Prepared according to the general procedure using 0.0471 g (0.2 mmol) of **1ad**, 0.0642 g (0.60 mmol) of **2a**, 0.0040 g (0.02 mmol) of FeCl<sub>2</sub>·4H<sub>2</sub>O and 1 mL of DCE. After stirring at 80 °C for 12 h, the reaction was monitored by <sup>1</sup>H NMR and no desired product was observed.

#### IV. Gram-Scale Reaction.

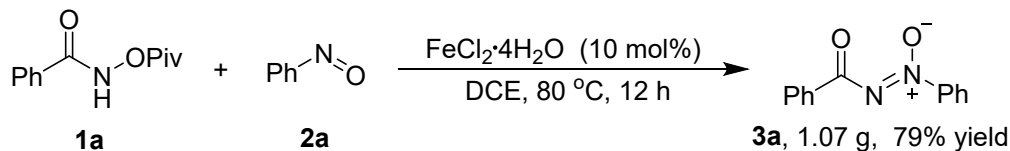

A 25 mL Schlenk flask was charged with 1.33 g (6 mmol) of **1a**, 1.93 g (18 mmol), 0.0120 g FeCl<sub>2</sub>·4H<sub>2</sub>O. The reaction mixture was stirred at 80 °C for 12 h, added with EA to dilute, filtered, and concentrated under reduced pressure. The residue was purified by flash column chromatography using solution PE/EA (10:1) as the eluent to give 1.07 g (4.74 mmol, 79% yield) of **3a** as a yellow oil.

#### V. Further Derivatizations.

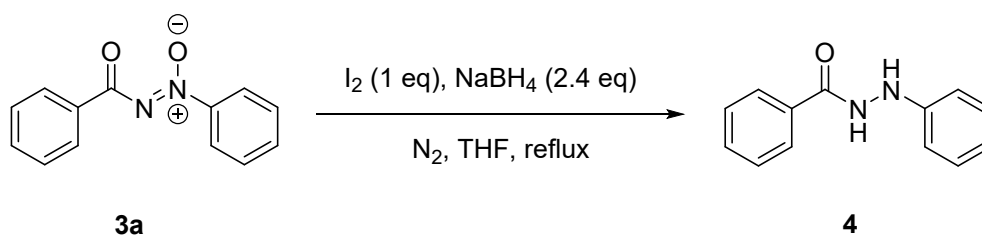

A 10 mL Schlenk flask was charged with 0.0452 (0.20 mmol) of **3a**, 0.0508 g (0.20 mmol) of I<sub>2</sub>, 0.0183 g (0.48 mmol) of NaBH<sub>4</sub> and (1 mL) THF under nitrogen atmosphere. The reaction mixture was stirred at reflux for 12 h, added with EA to dilute, filtered, and concentrated under reduced pressure. The residue was purified by flash column chromatography using solution PE/EA (4:1) as the eluent to give 0.0349 g (0.20 mmol, 82% yield) of **4** as a white solid.<sup>5</sup> <sup>1</sup>H NMR (400 MHz, DMSO-d<sub>6</sub>) δ 10.36 (s, 1H), 7.93-7.90 (m, 3H), 7.58-7.50 (m, 1H), 7.50 (m, 2H), 7.15-7.13 (m, 2H), 6.80 (d, *J* = 7.7 Hz, 2H), 6.74-6.70 (m, 1H).

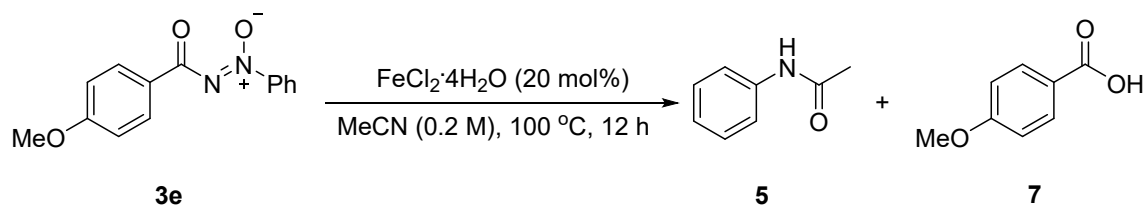

Prepared according to a previously reported procedure,<sup>6</sup> a 10 mL Schlenk flask was charged with

<sup>5</sup> R. Liu, Z. Li, S. Liu, J. Zheng, B. Cheng, R. Yu, H. Geng, *J. Agric. Food Chem.*, 2023, **71**, 6803-6817.

<sup>6</sup> Y. Yan, Z. Zhang, Y. Wan, G. Zhang, M. Ma, Q. Liu, *J. Org. Chem.*, 2017, **82**, 7957-7963.

0.0512 g (0.20 mmol) of **3e**, 0.0080 g (0.04 mmol) of FeCl<sub>2</sub>·4H<sub>2</sub>O, 1 mL (0.2 M) of MeCN. The reaction mixture was stirred at 100 °C for 12 h, added with EA to dilute, filtered, and concentrated under reduced pressure. The residue was purified by flash column chromatography using solution PE/EA (2:1) as the eluent to give 0.0154 g (0.20 mmol, 57% yield) of **5** as a white solid. <sup>1</sup>H NMR (400 MHz, DMSO-d<sub>6</sub>) δ 9.90 (s, 1H), 7.57 (d, *J* = 8.0 Hz, 2H), 7.30-7.26 (m, 2H), 7.04-7.00 (m, 1H), 2.04 (s, 3H).

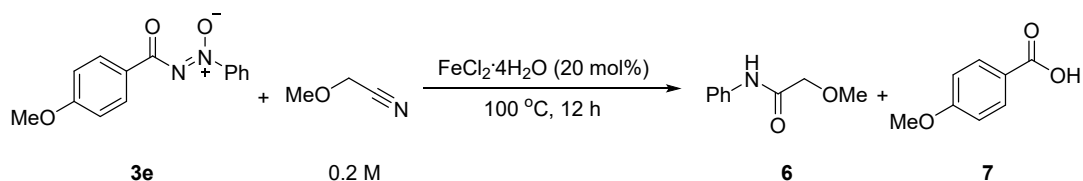

Prepared according to a previously reported procedure,<sup>6</sup> a 10 mL Schlenk flask was charged with 0.0512 g (0.20 mmol) of **3e**, 0.0080 g (0.04 mmol) of FeCl<sub>2</sub>·4H<sub>2</sub>O, 1 mL (0.2 M) of 2-methoxyacetonitrile. The reaction mixture was stirred at 100 °C for 12 h, added with EA (5 mL) to dilute, filtered, and concentrated under reduced pressure. The residue was purified by flash column chromatography using solution PE/EA (2:1) as the eluent to give 0.0168 g (0.20 mmol, 51% yield) of **6** as a white solid. <sup>1</sup>H NMR (500 MHz, CDCl<sub>3</sub>) δ 8.25 (br, 1H), 7.57 (d, *J* = 6.5 Hz, 2H), 7.34 (s, 2H), 7.13 (s, 1H), 4.02 (s, 2H), 3.51 (s, 3H). <sup>13</sup>C NMR (126 MHz, CDCl<sub>3</sub>) δ 167.6, 137.1, 129.1, 124.5, 119.8, 72.1, 59.3.

## VI. NMR Spectra

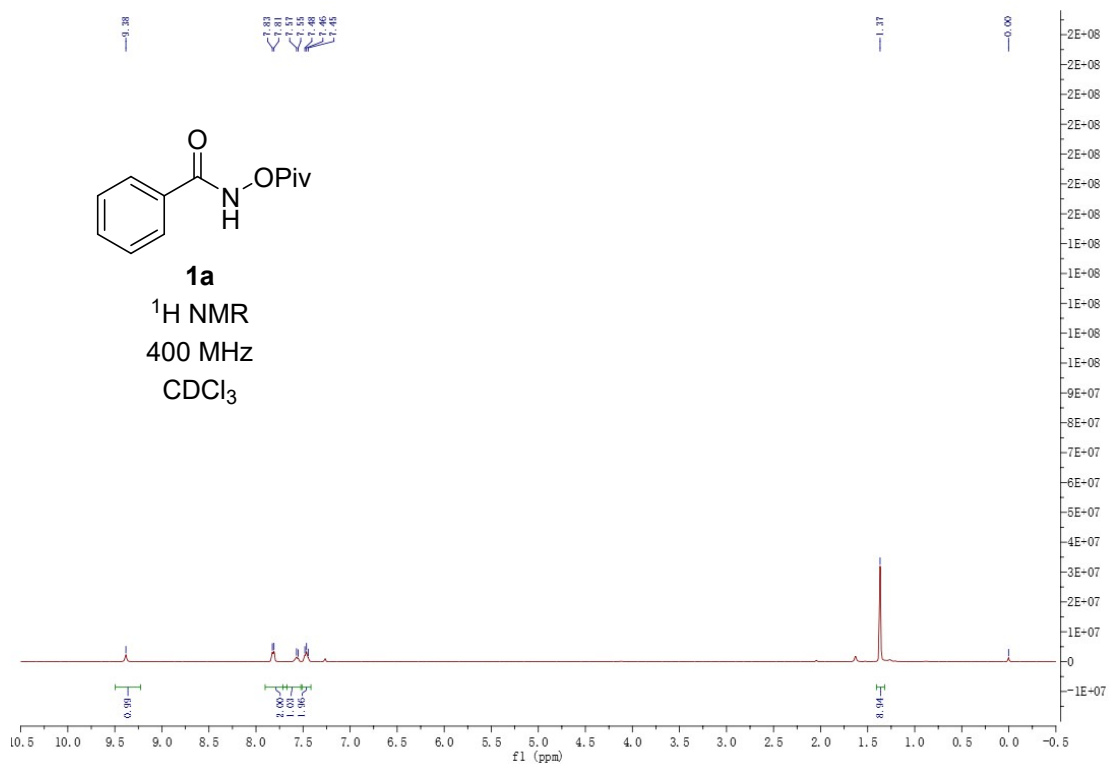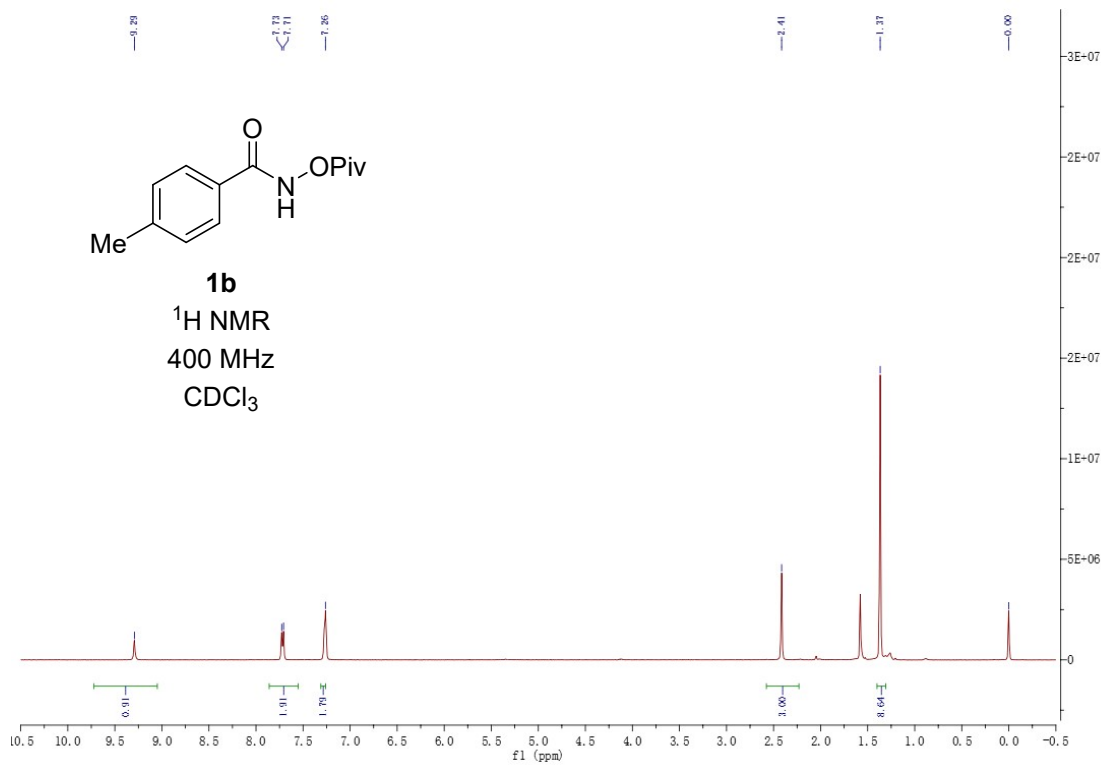

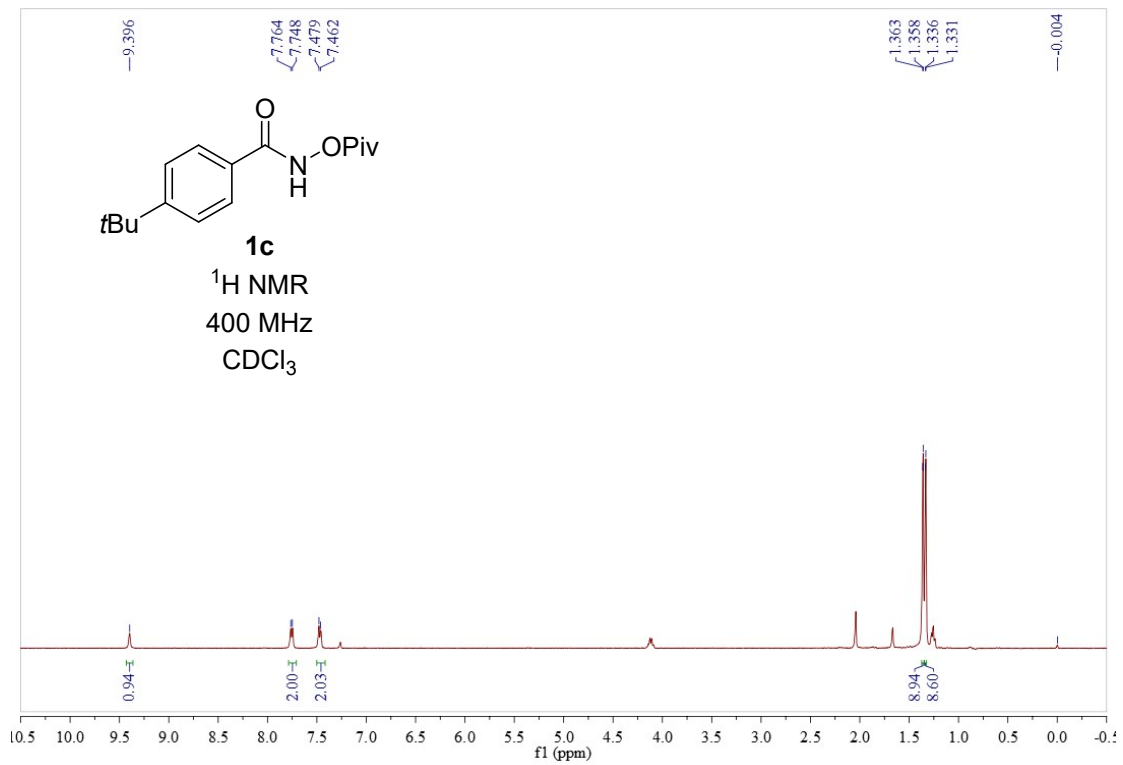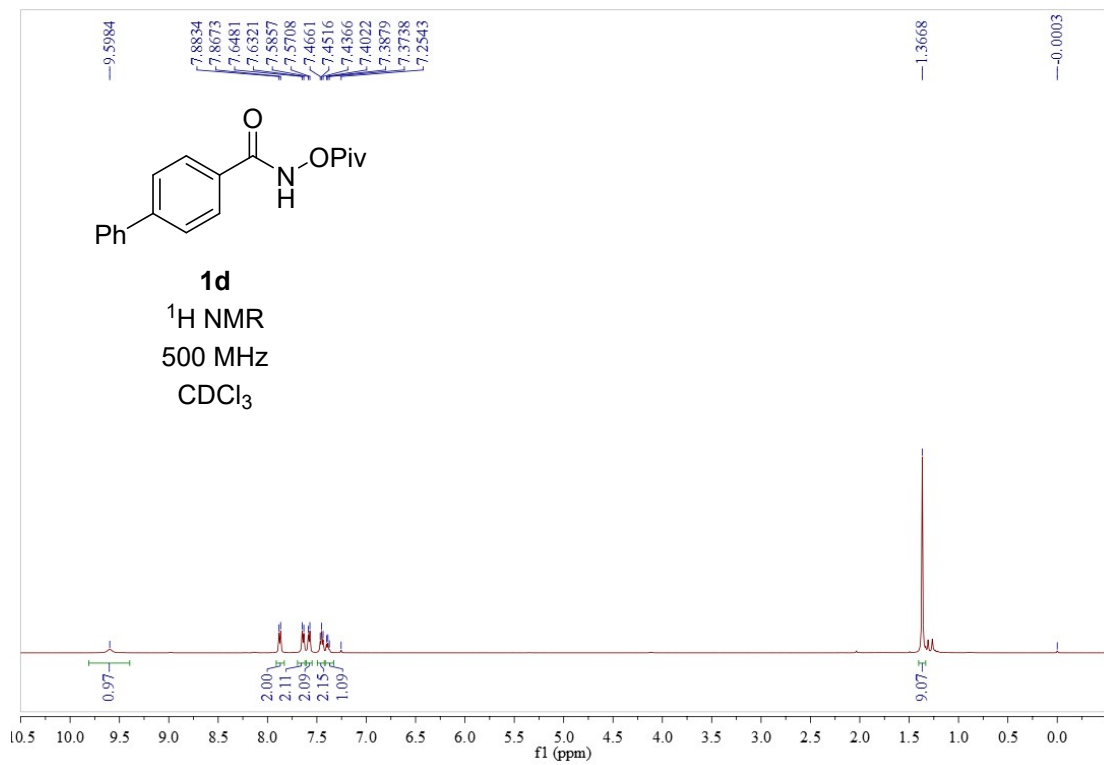

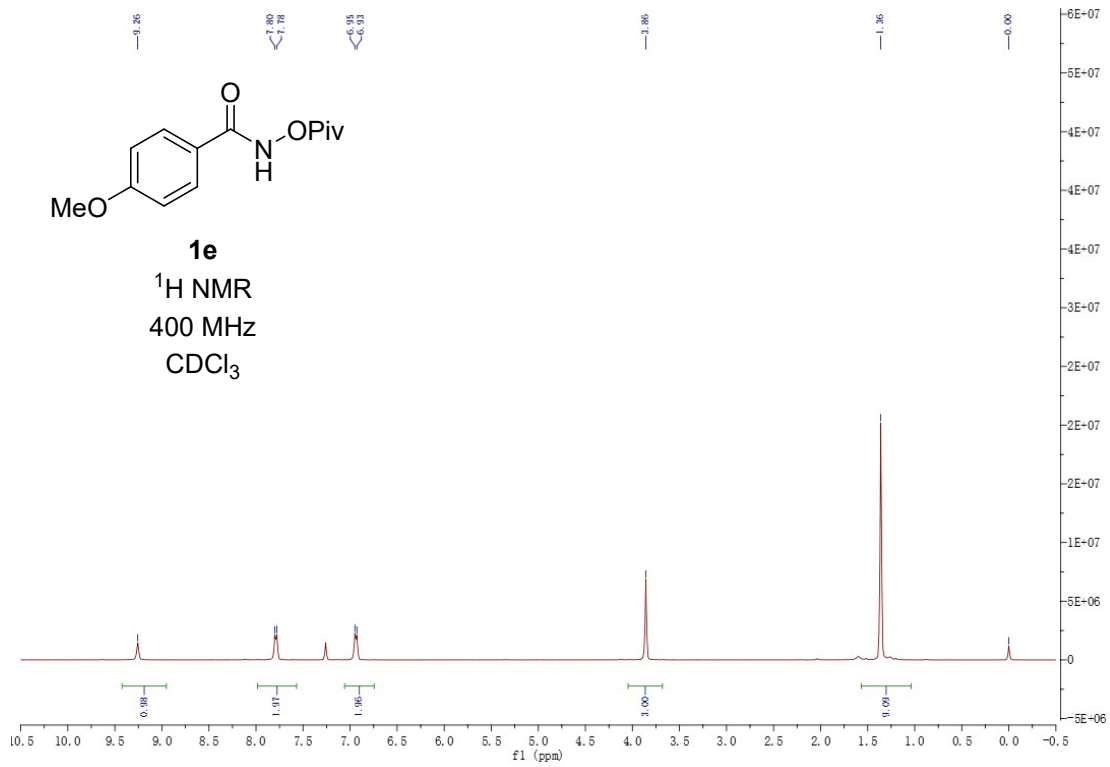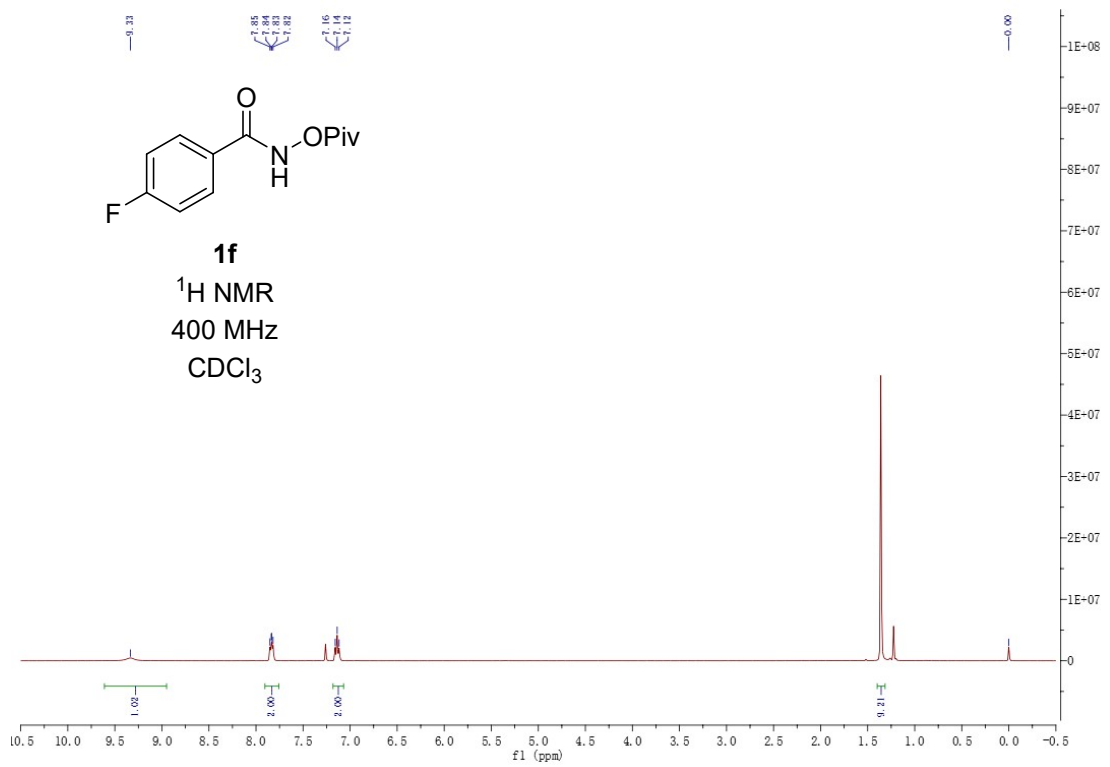



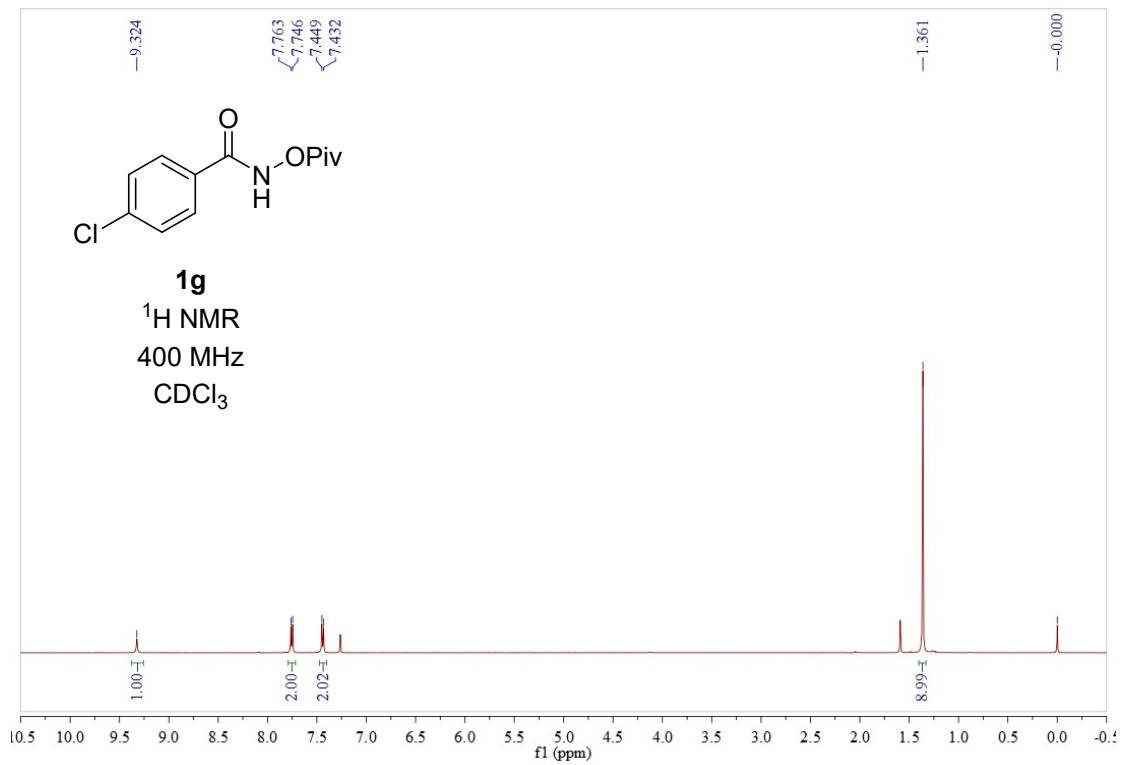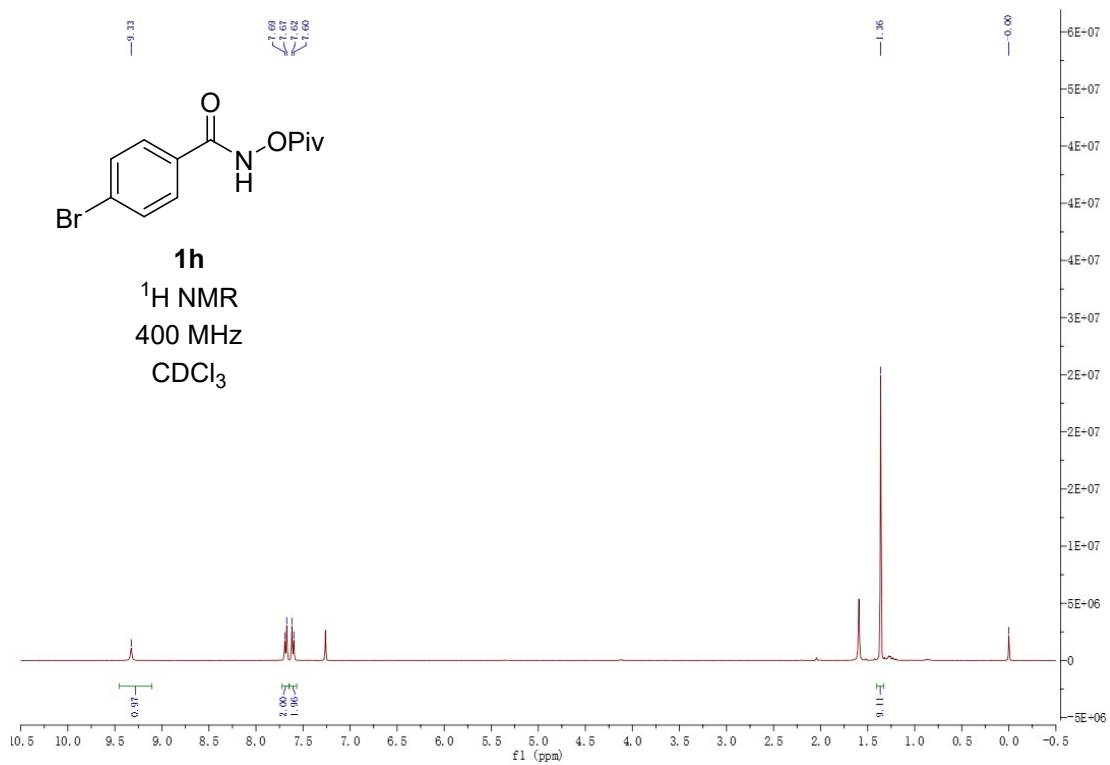

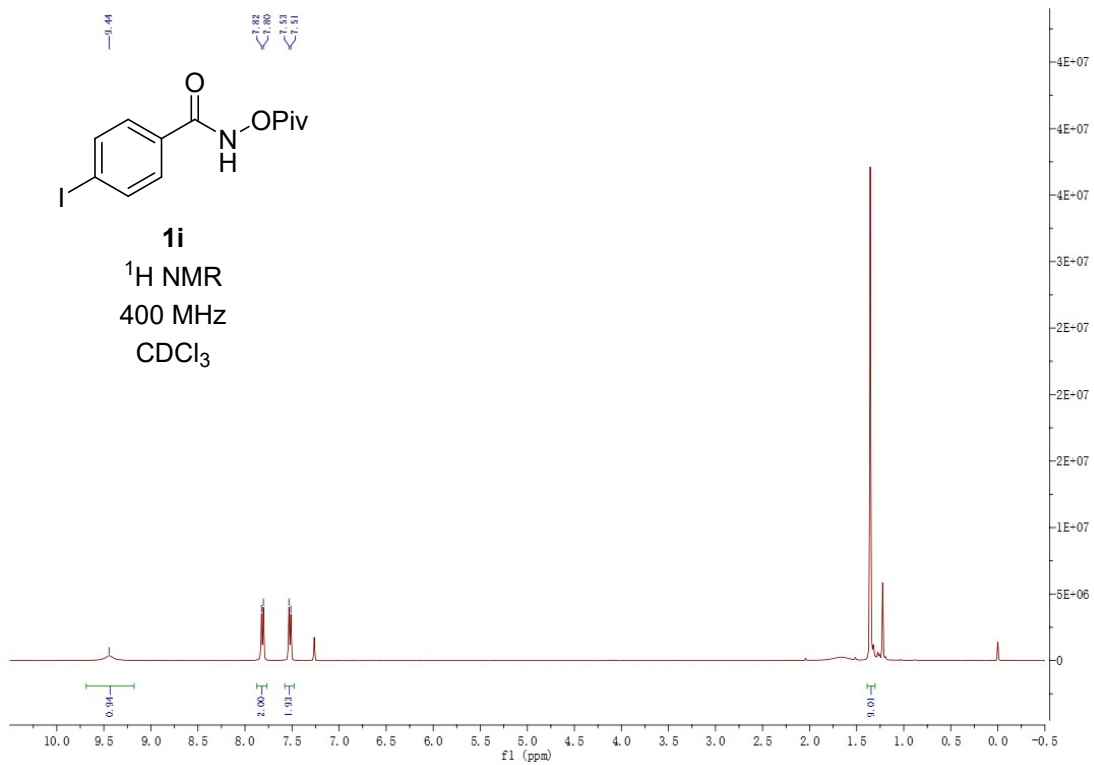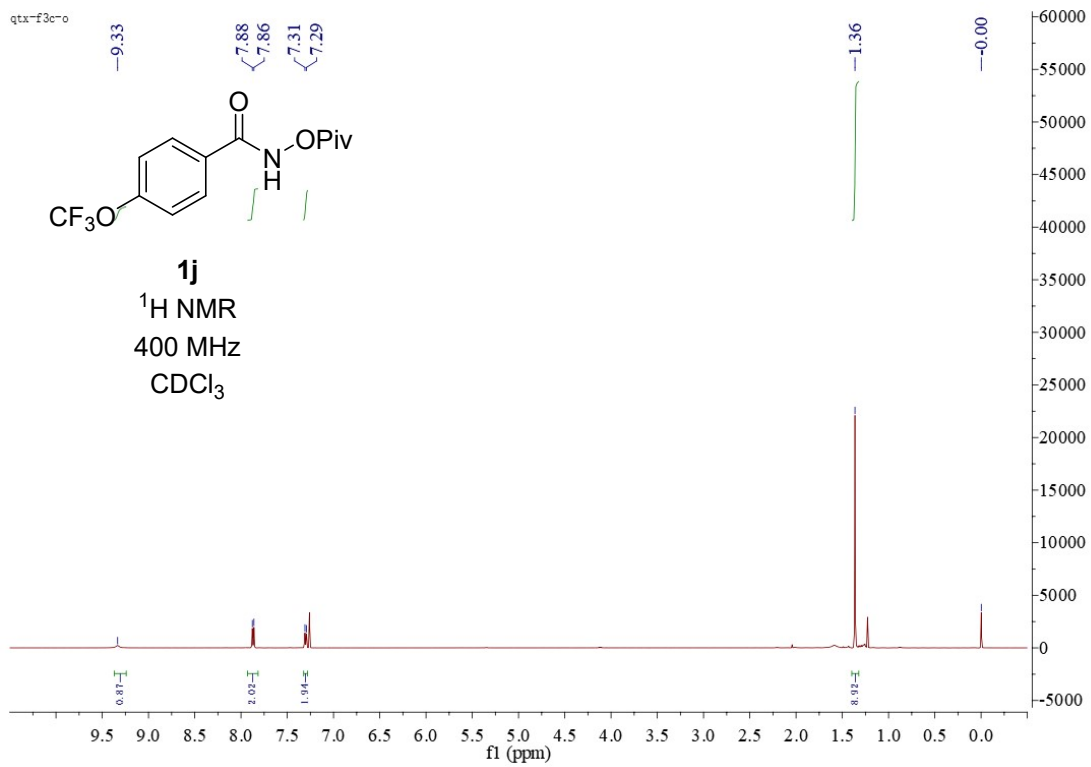

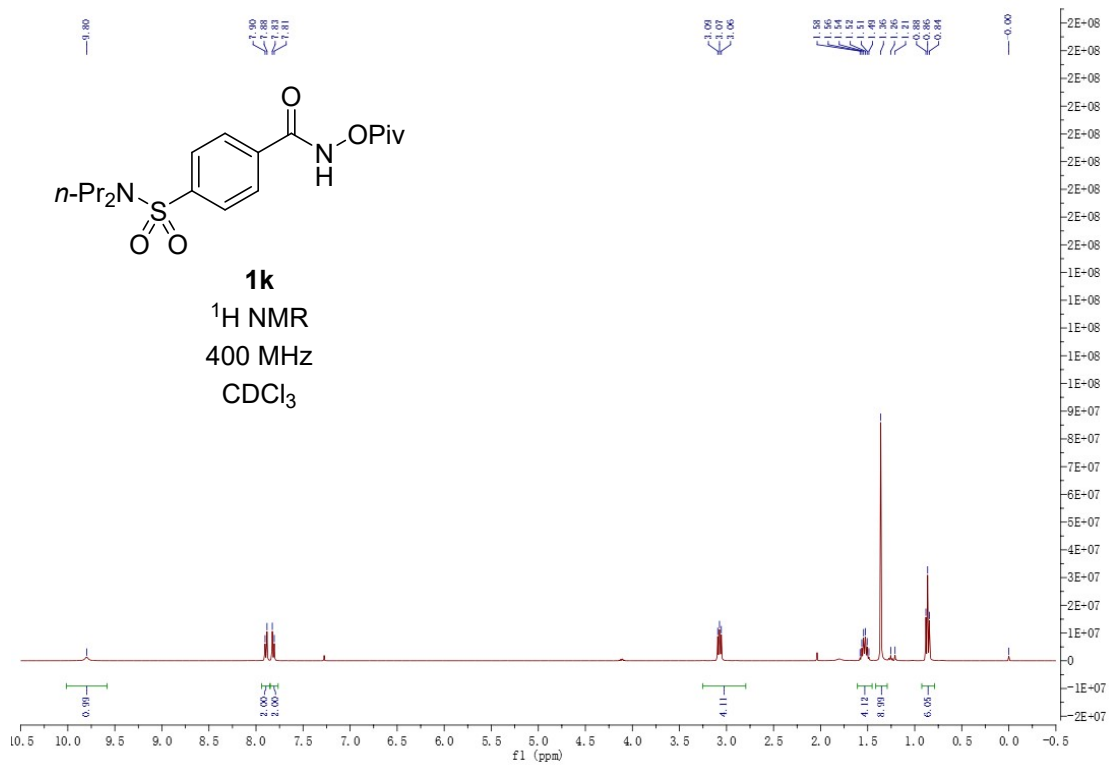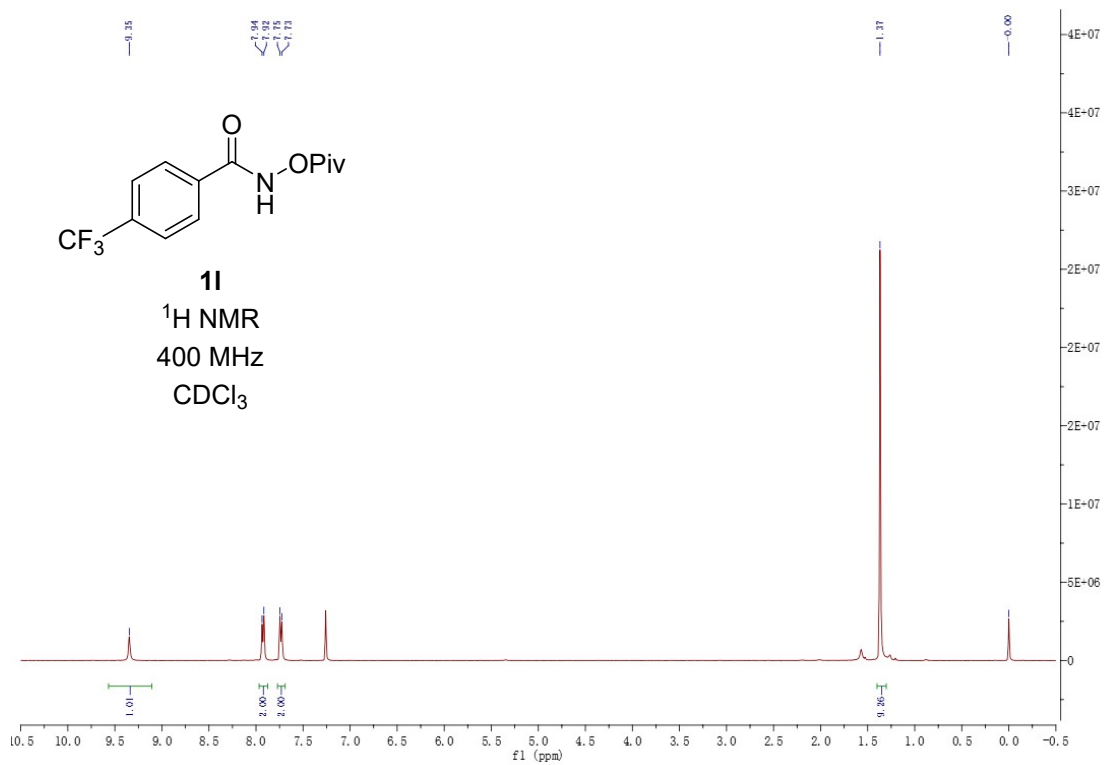

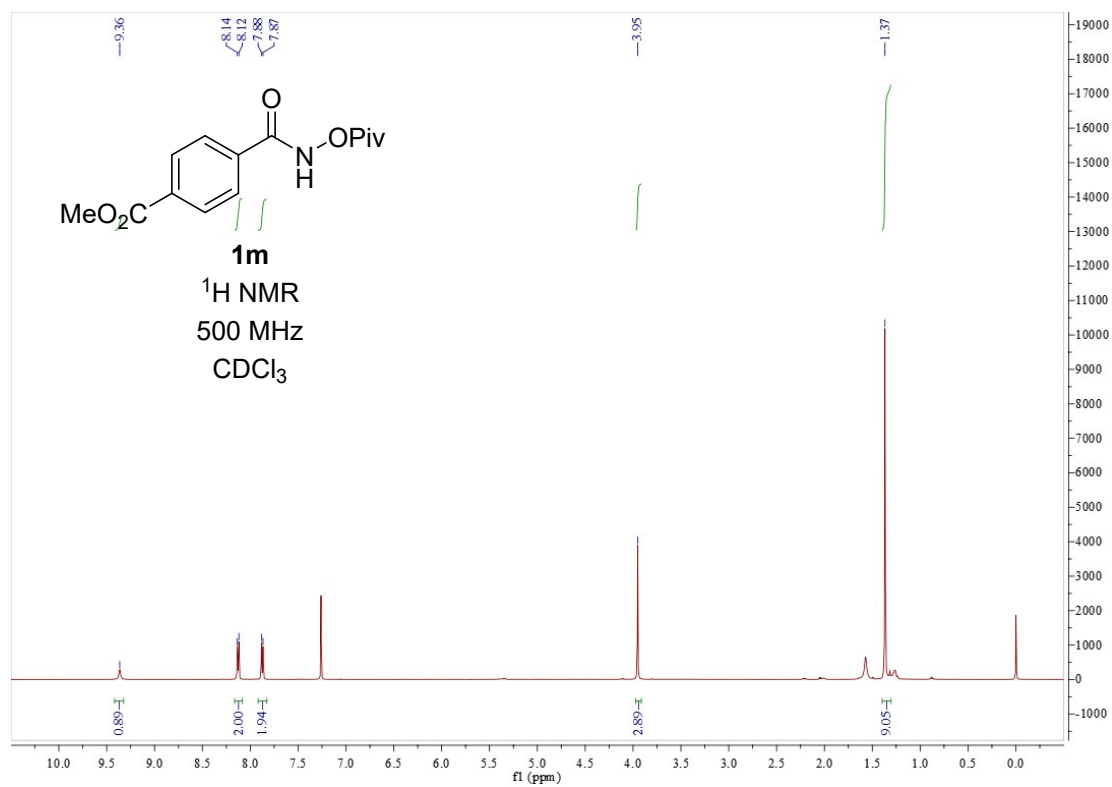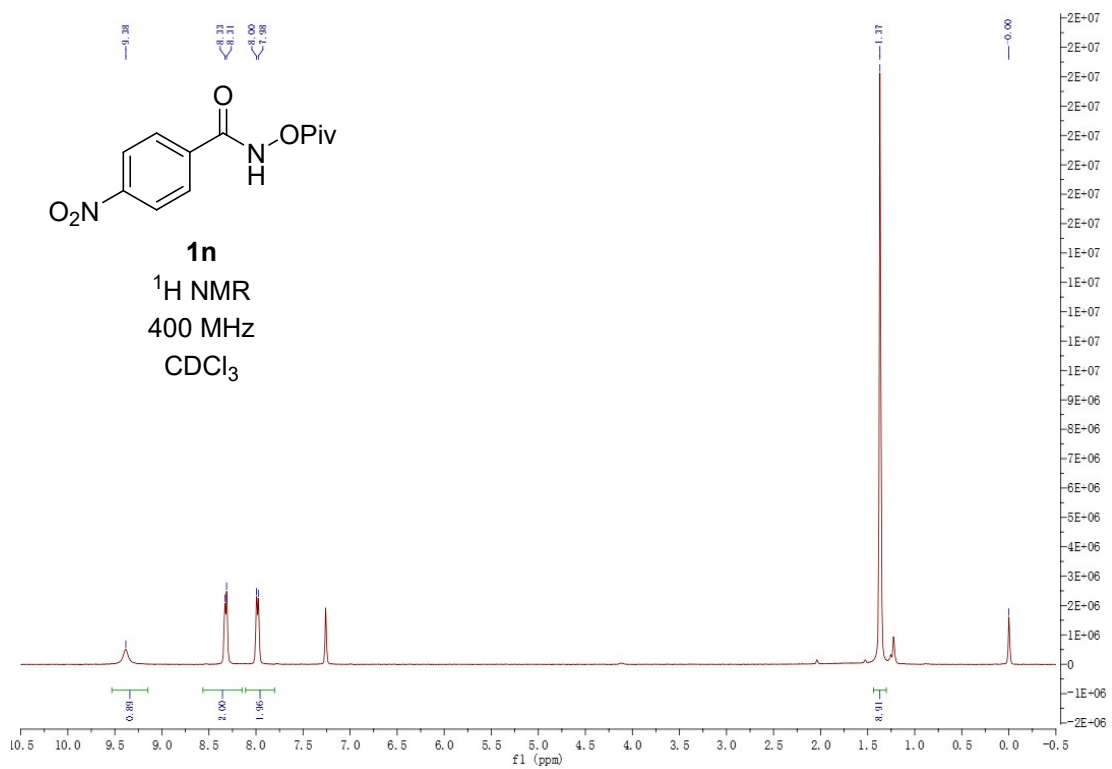

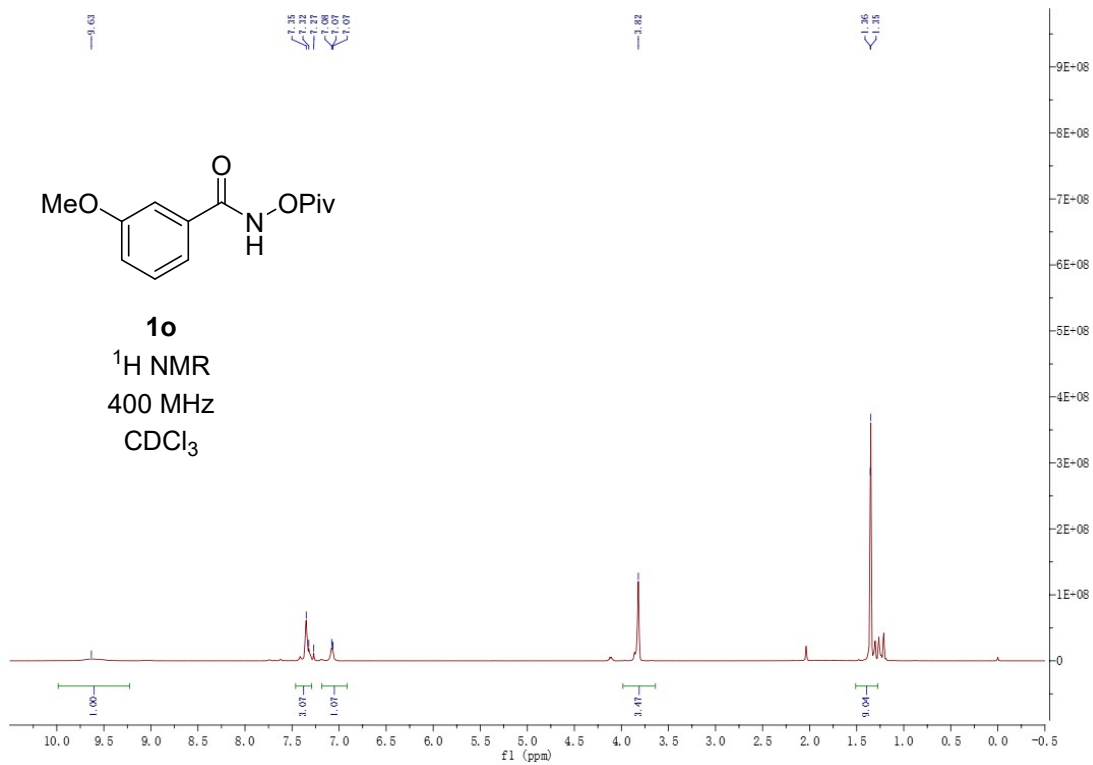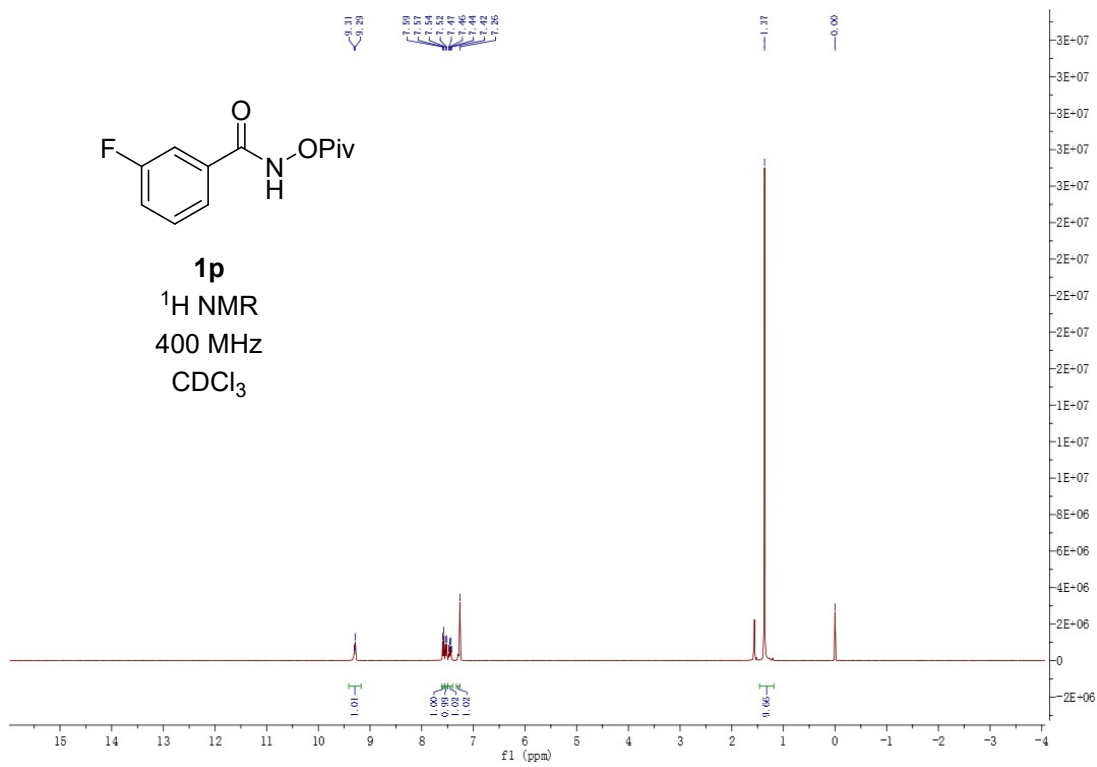

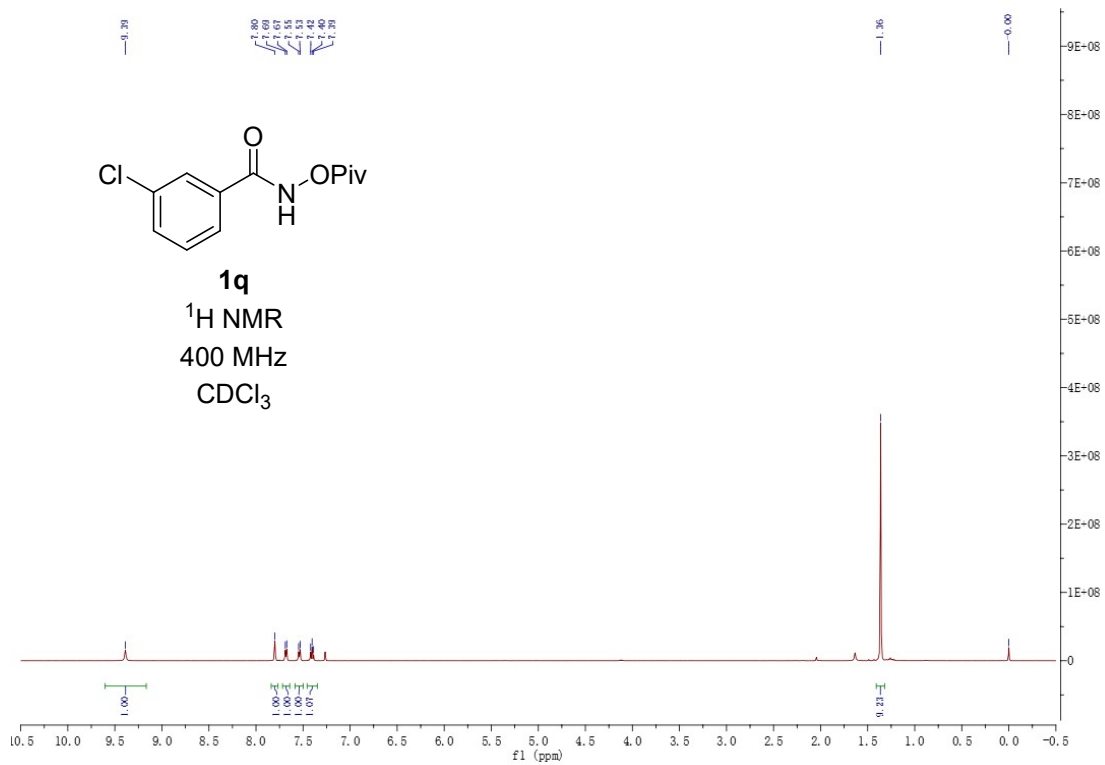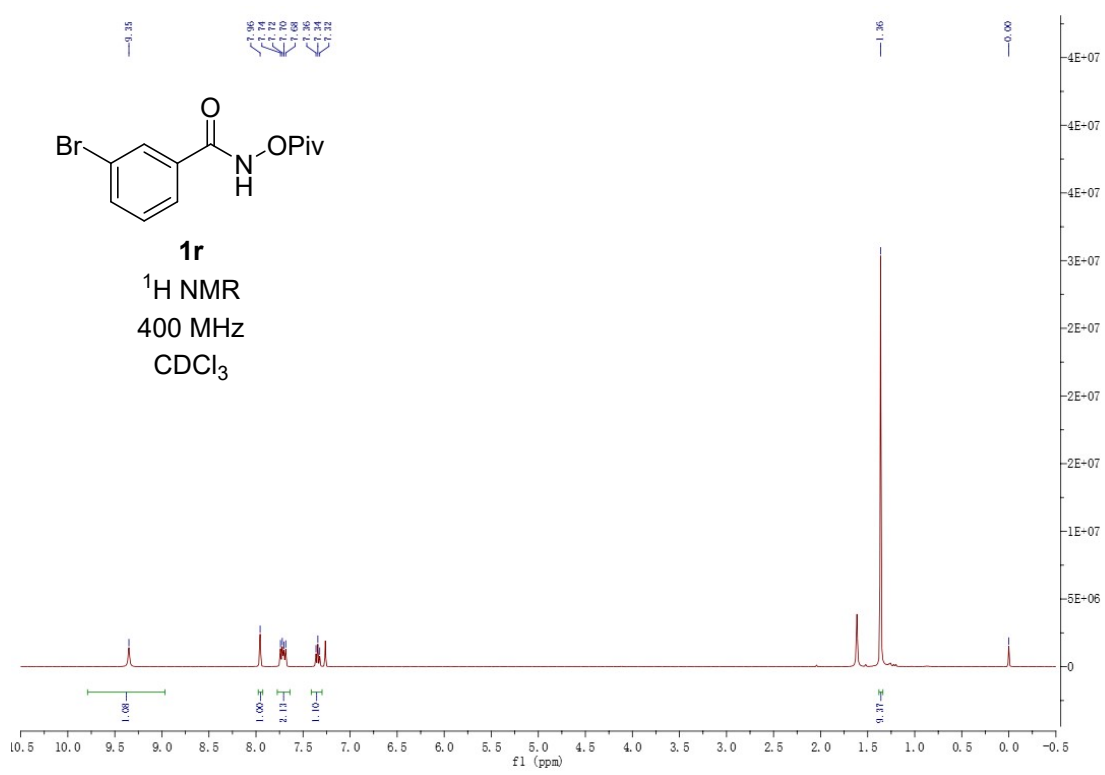

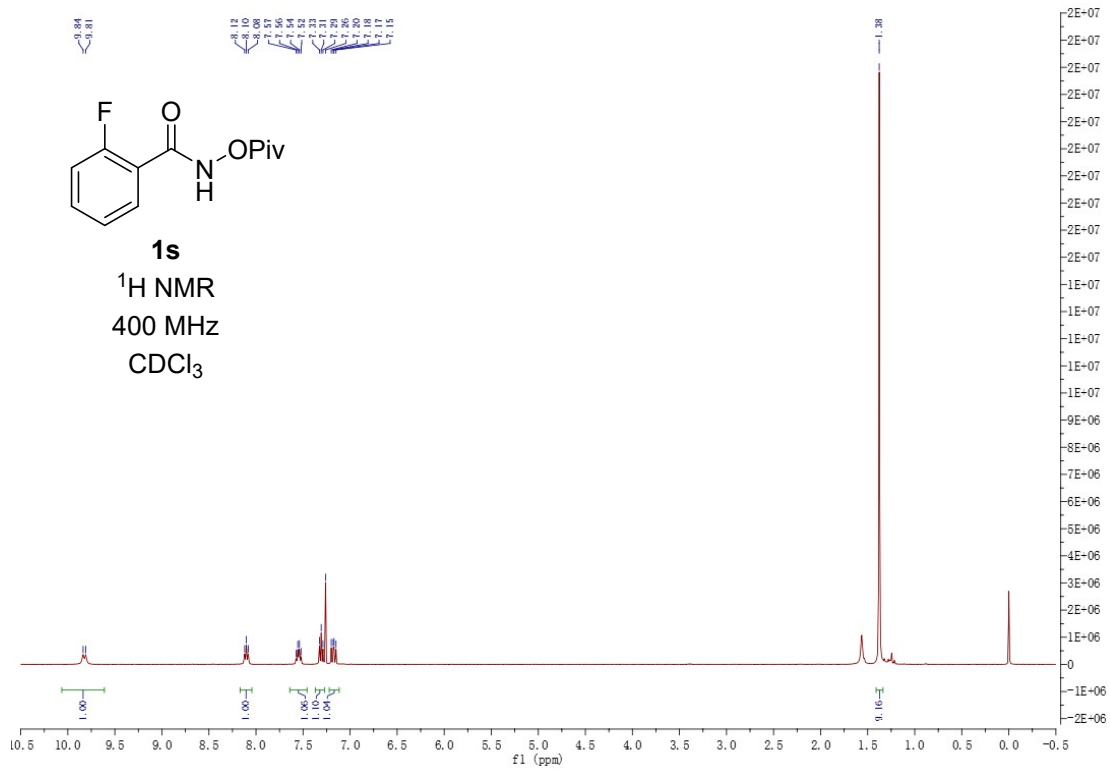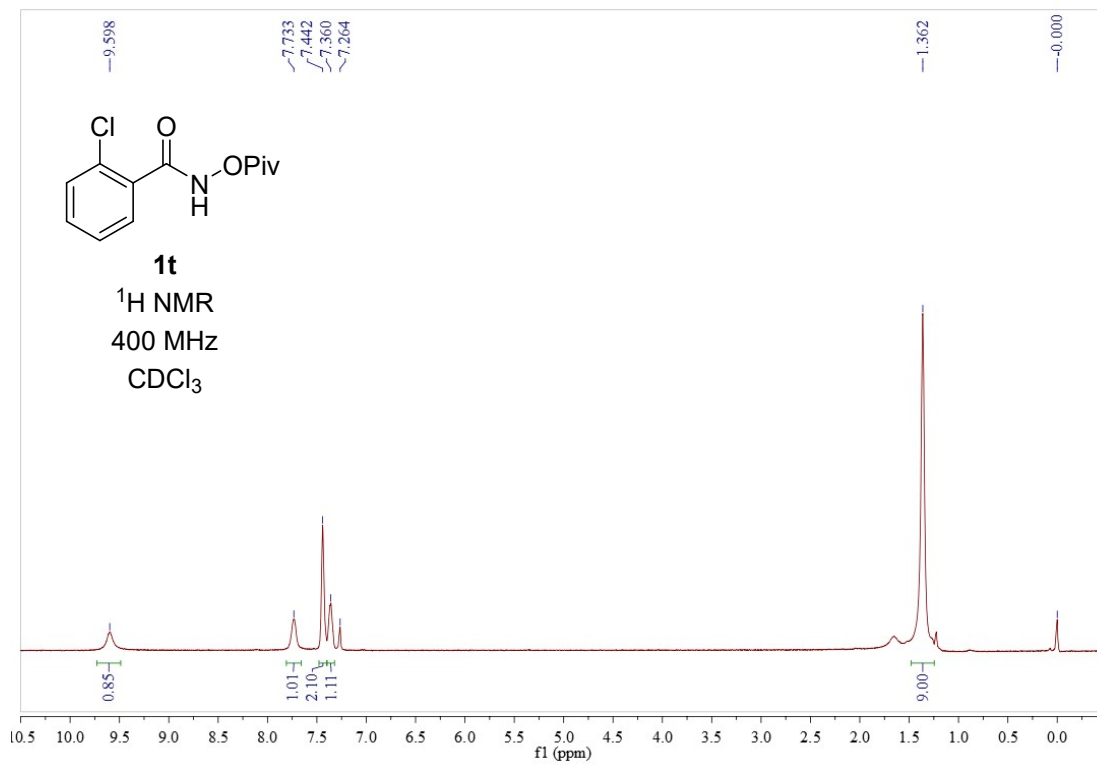

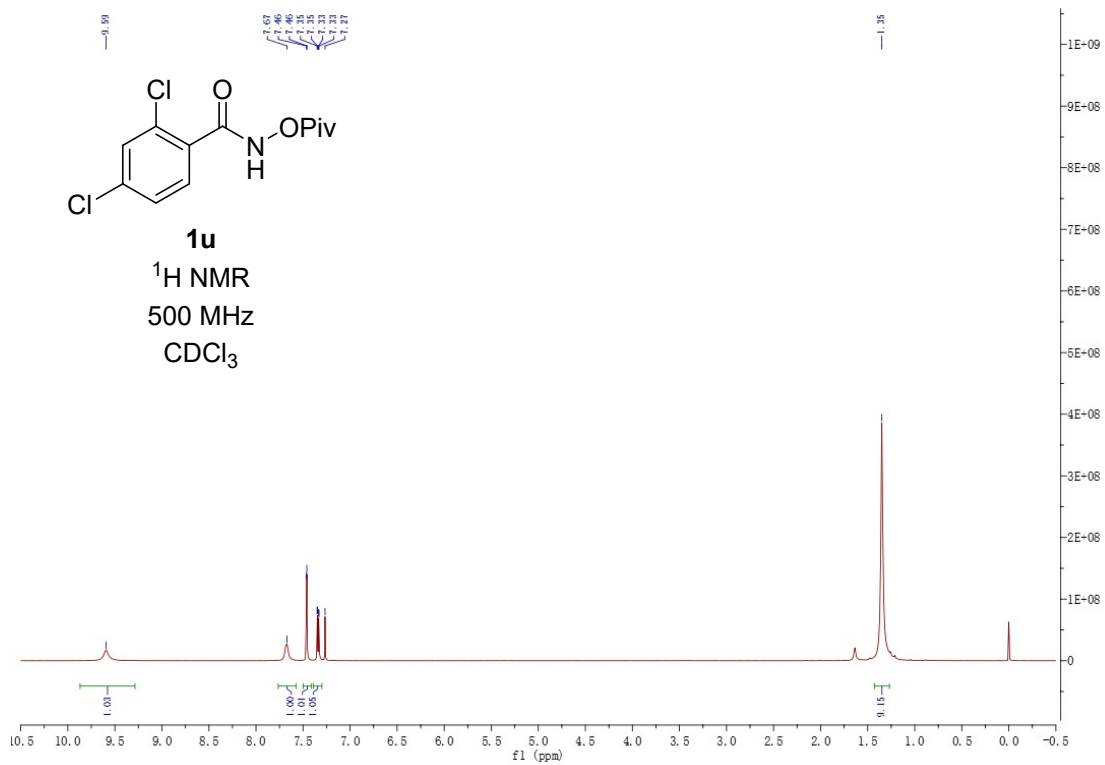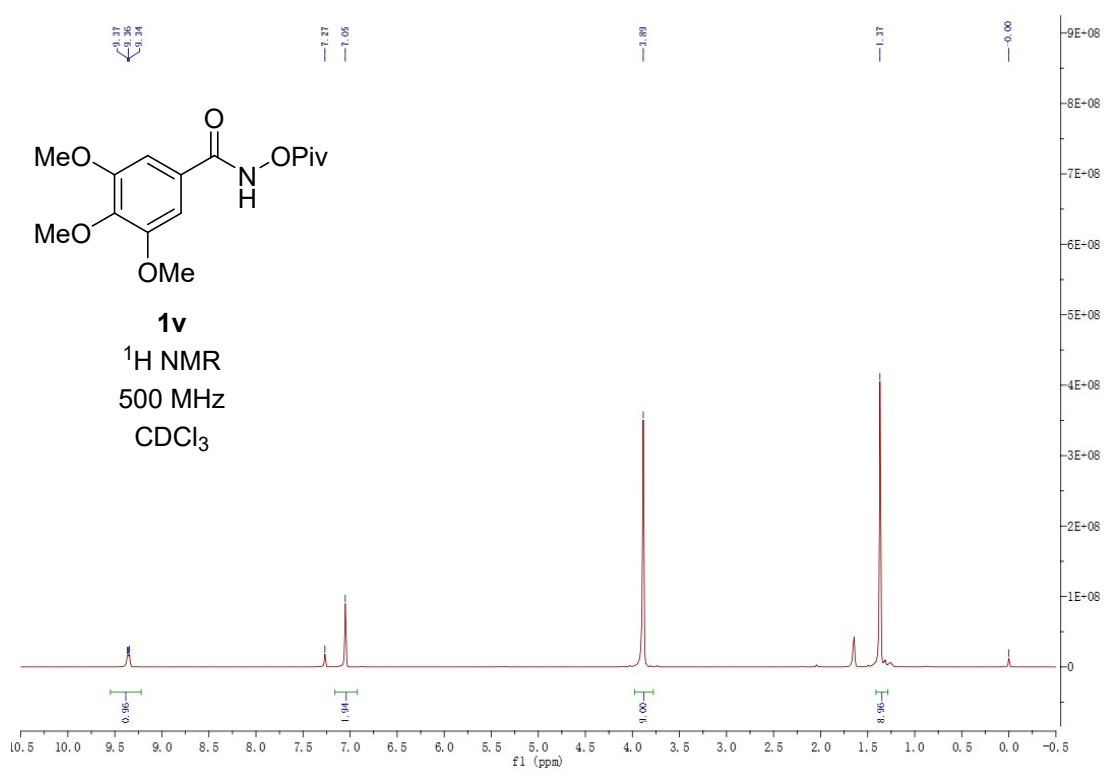



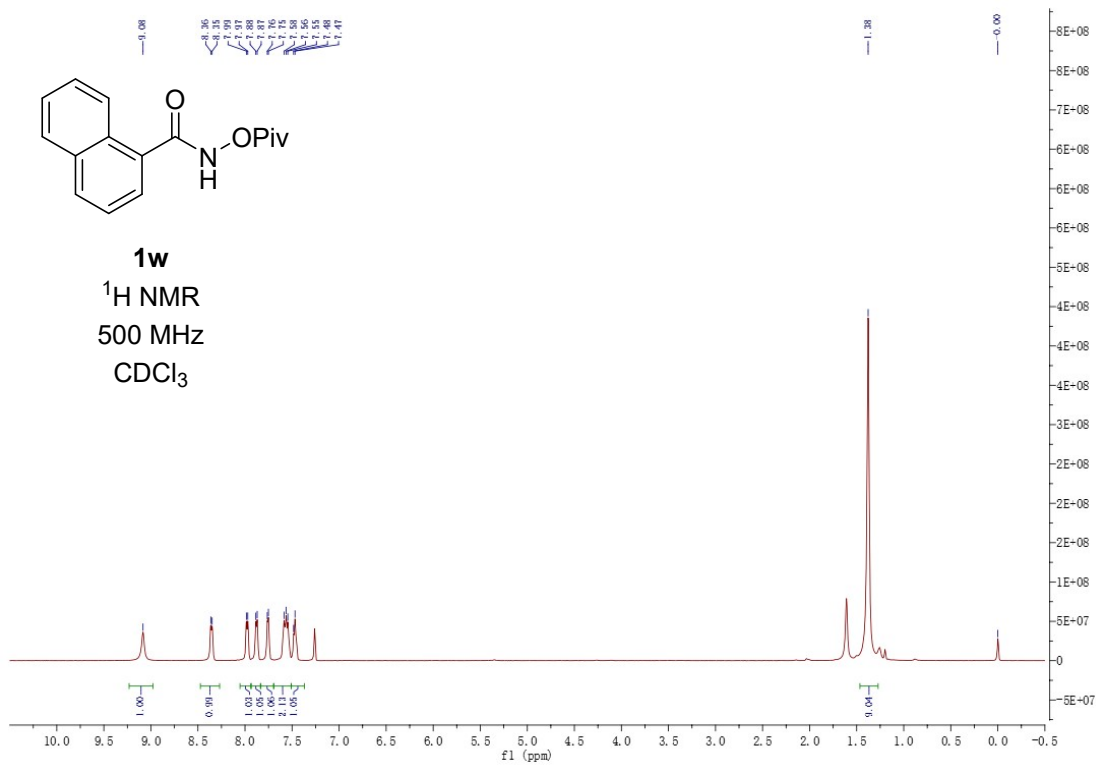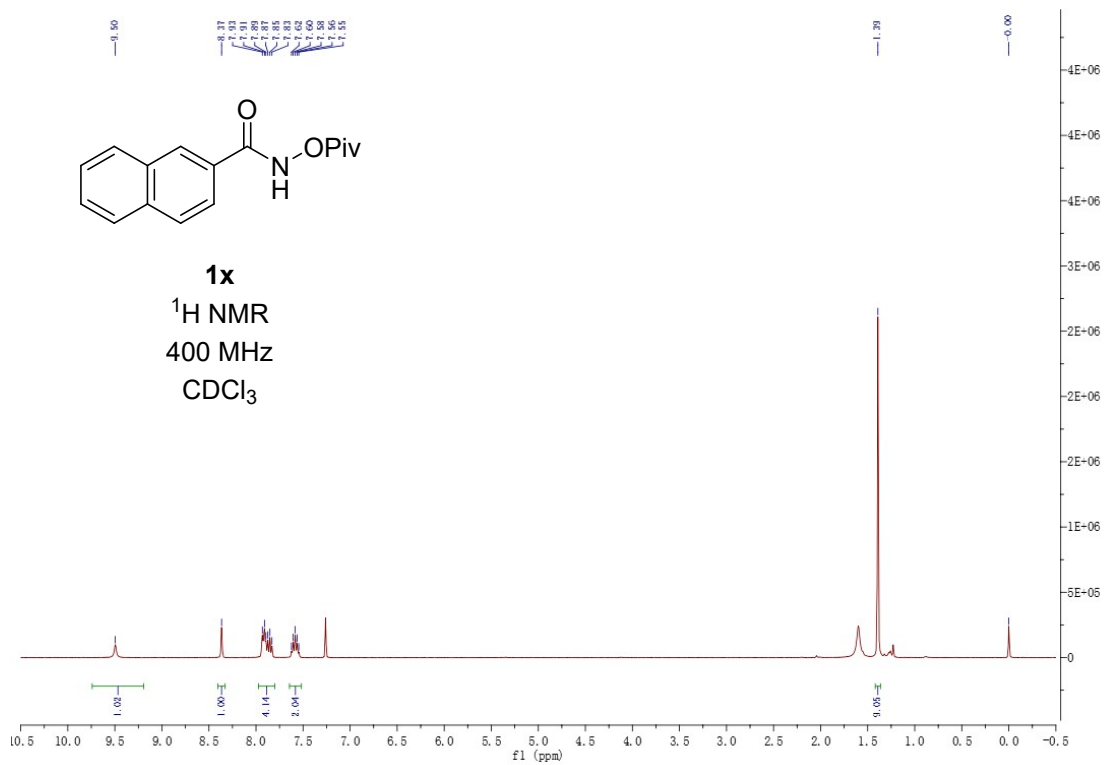

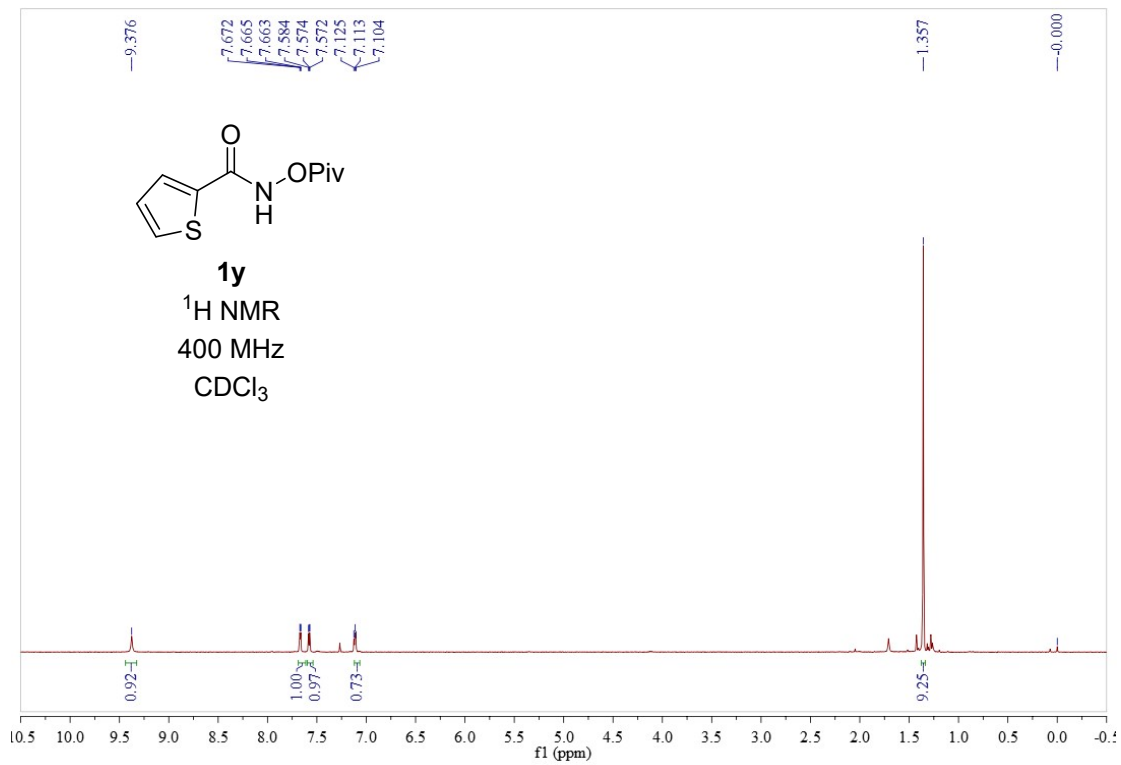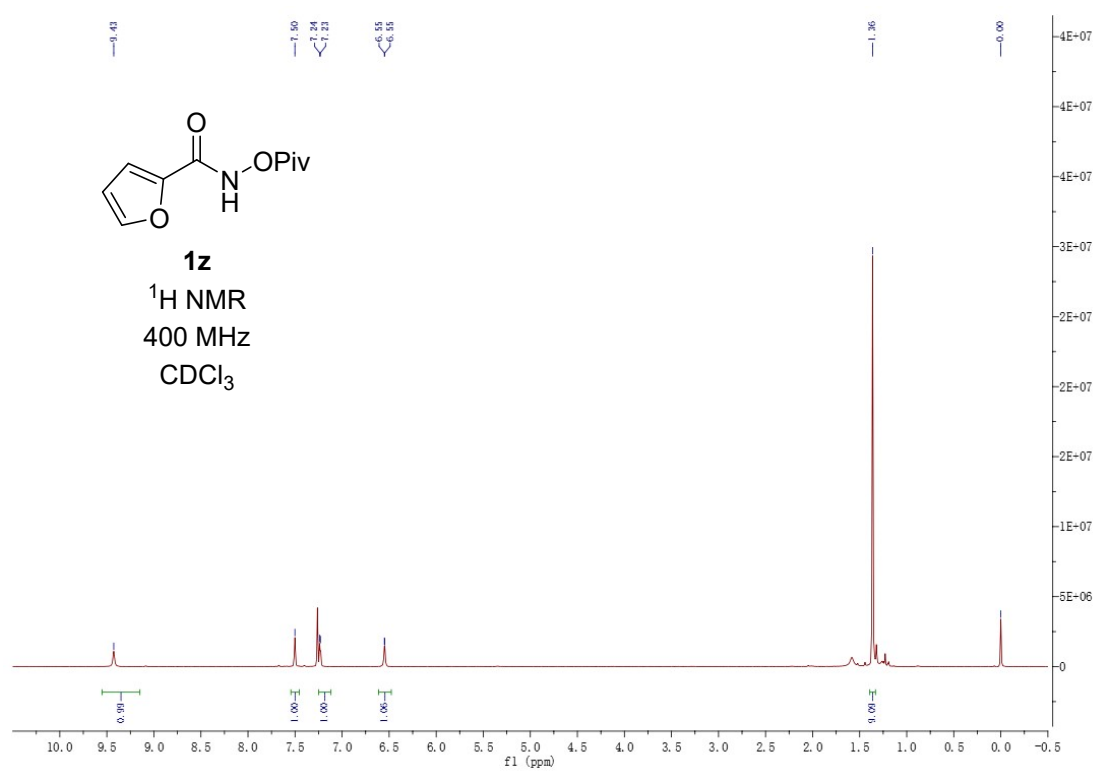

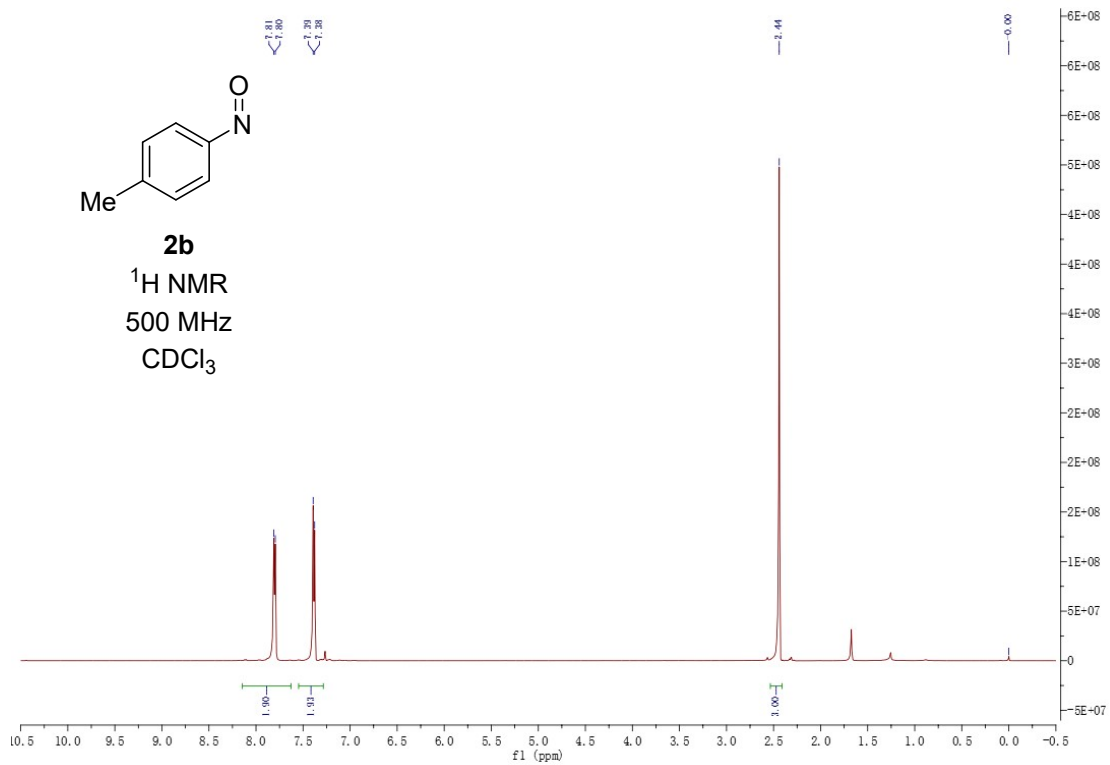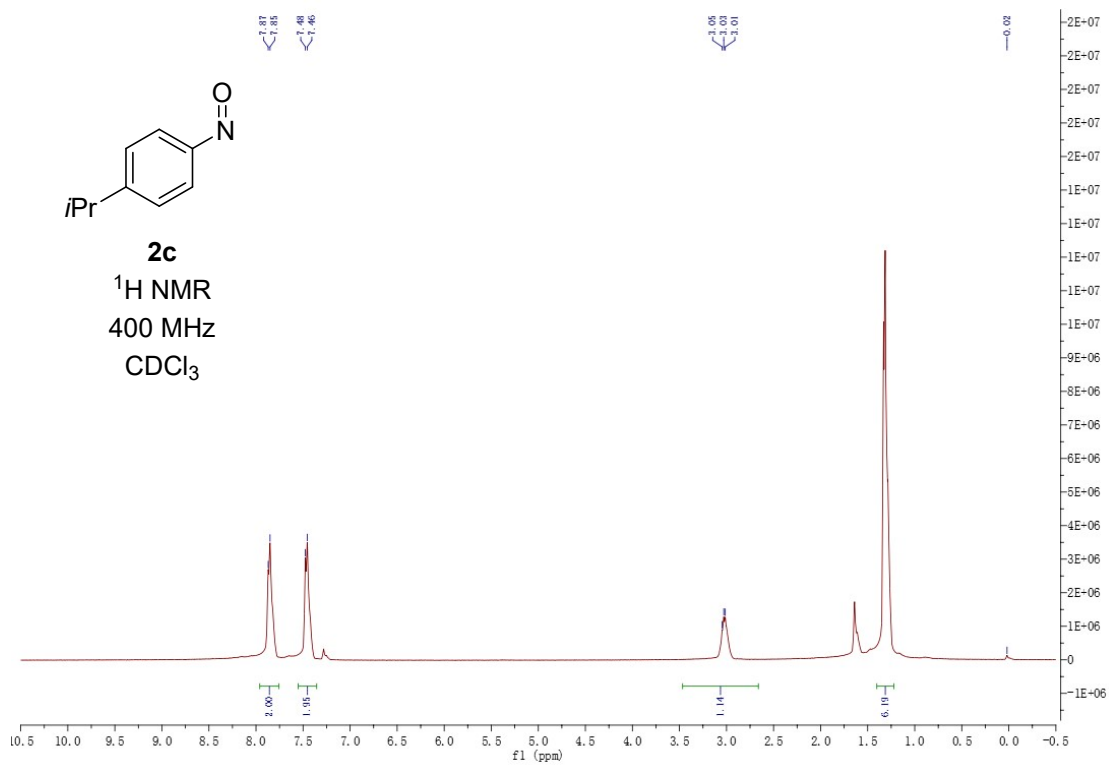

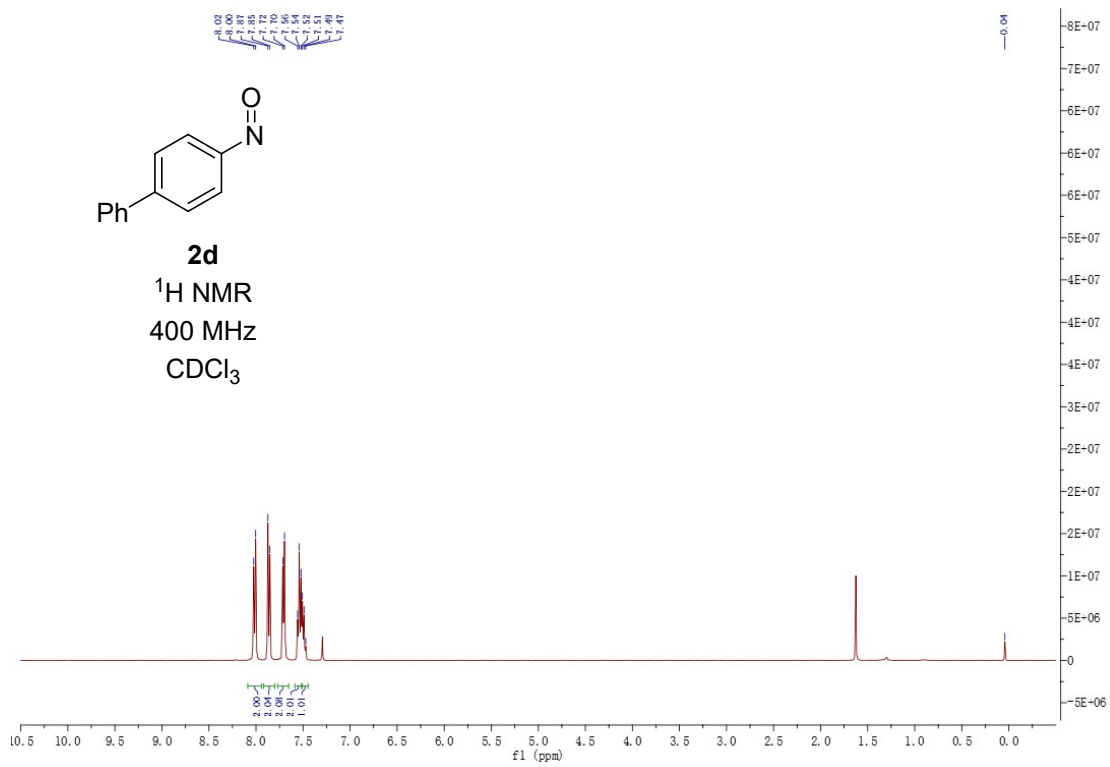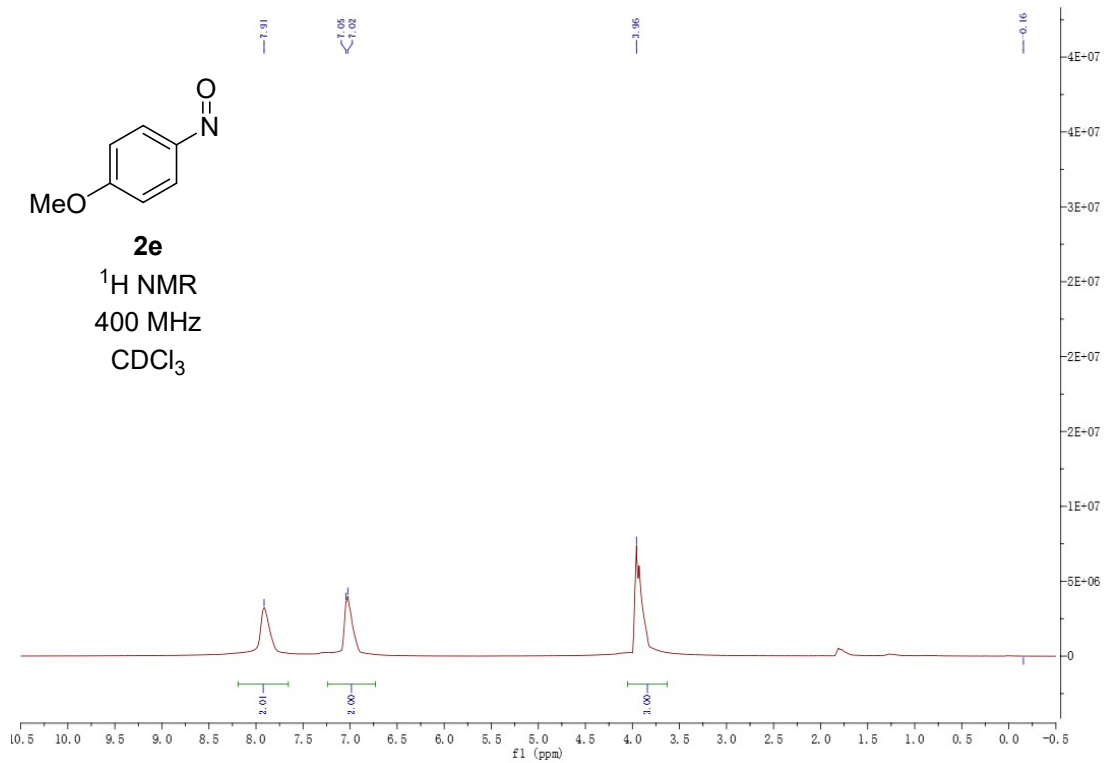

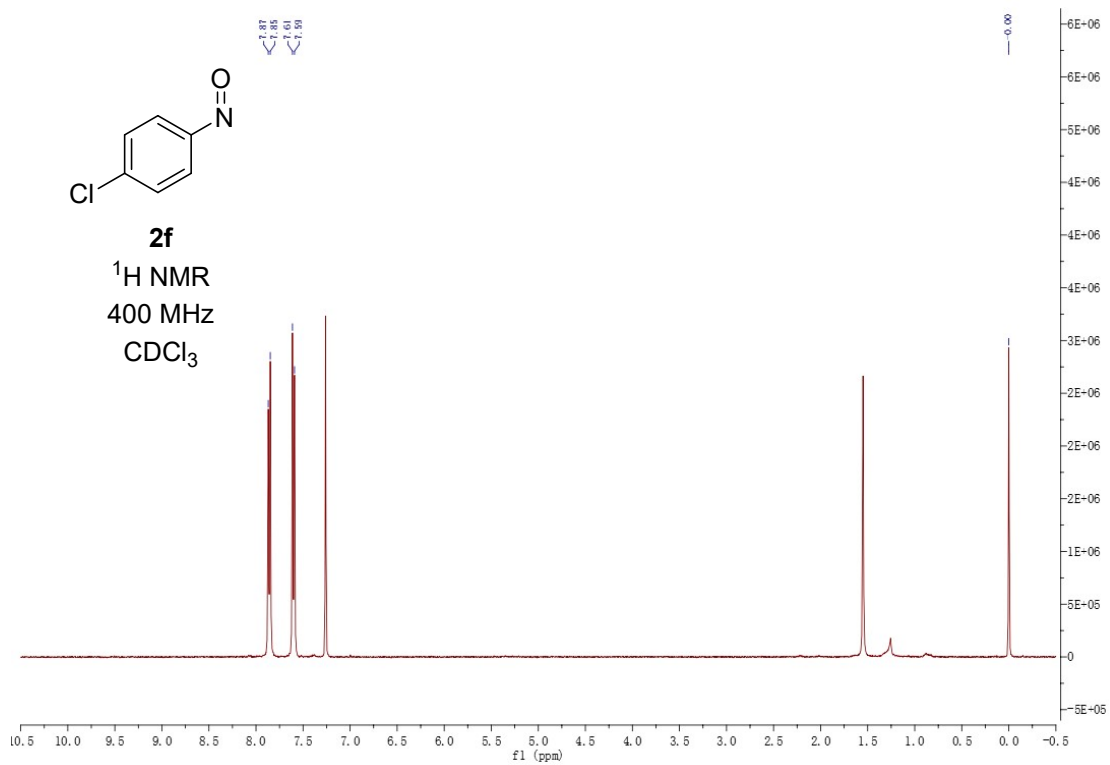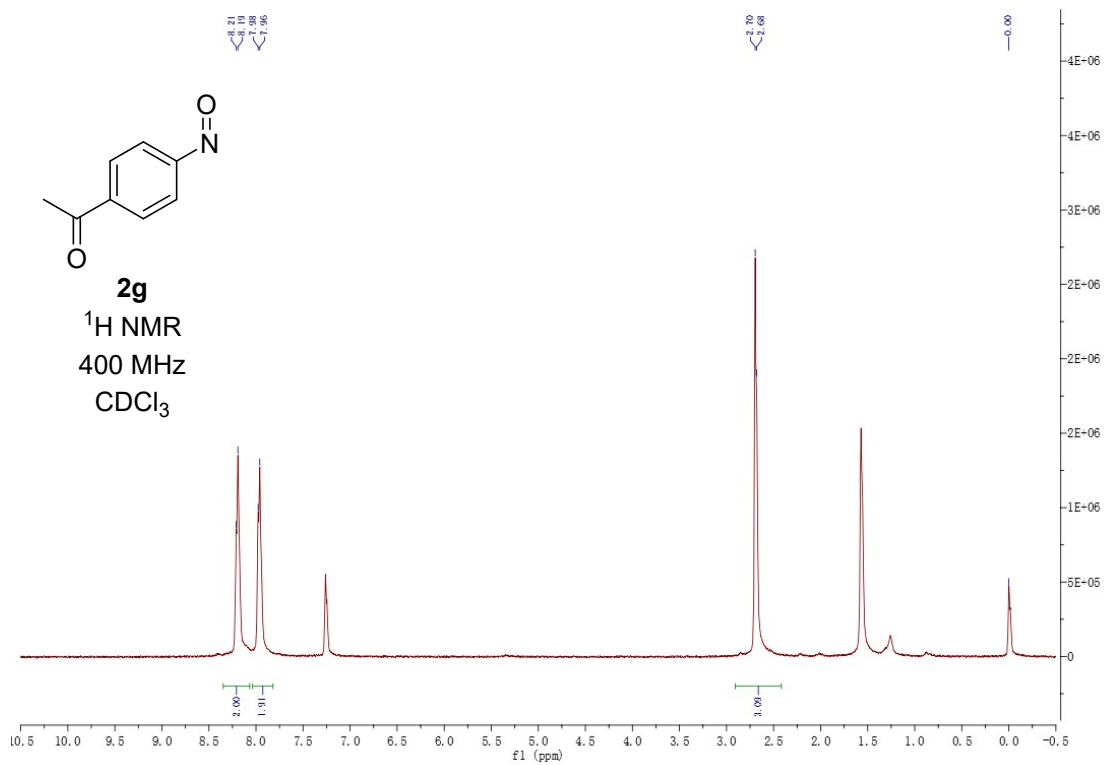

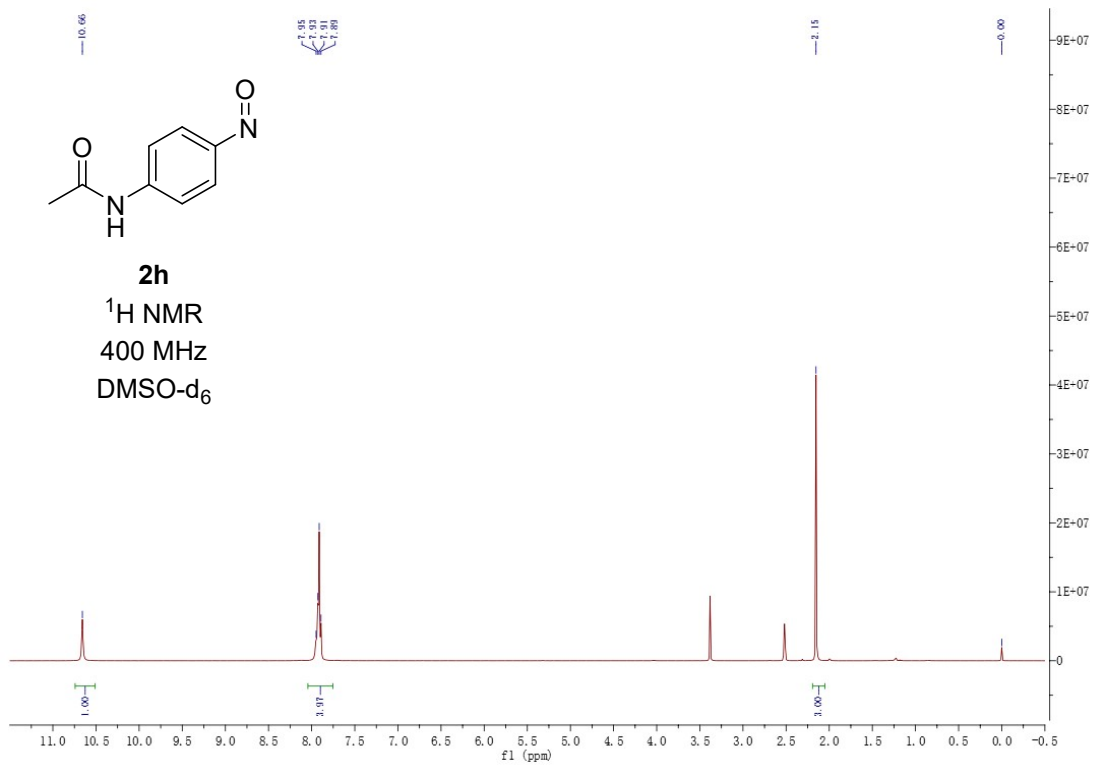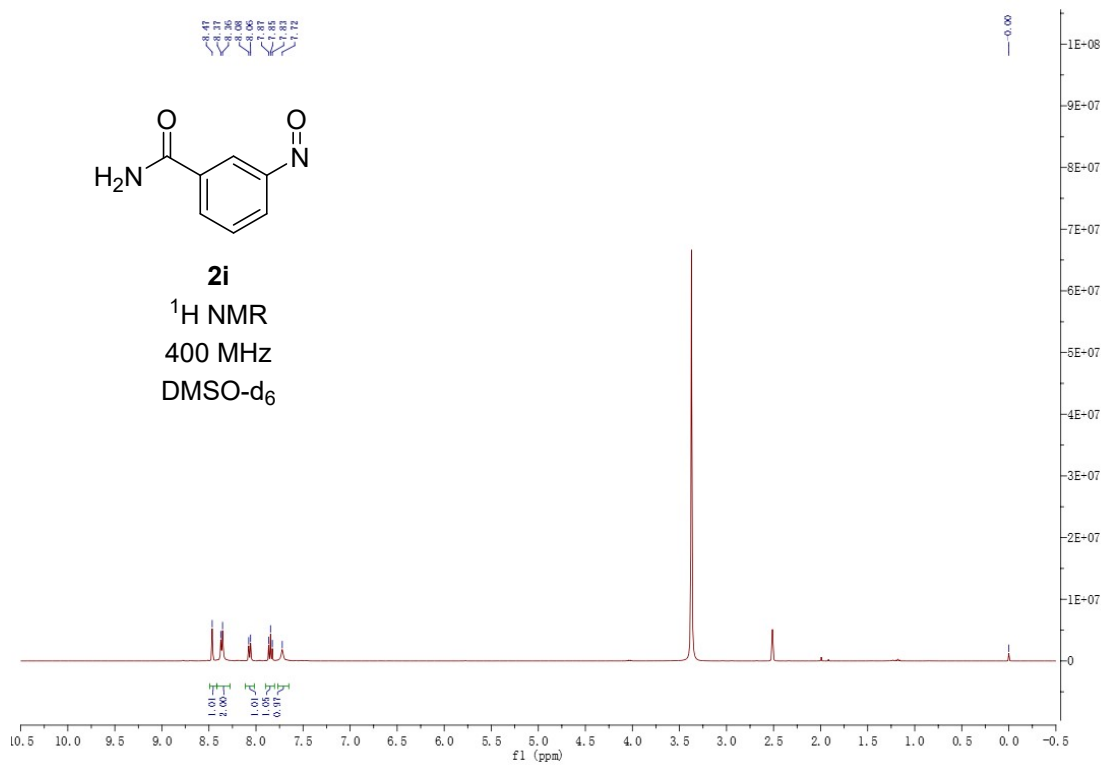

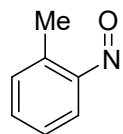

**2j**

<sup>1</sup>H NMR  
500 MHz  
CDCl<sub>3</sub>

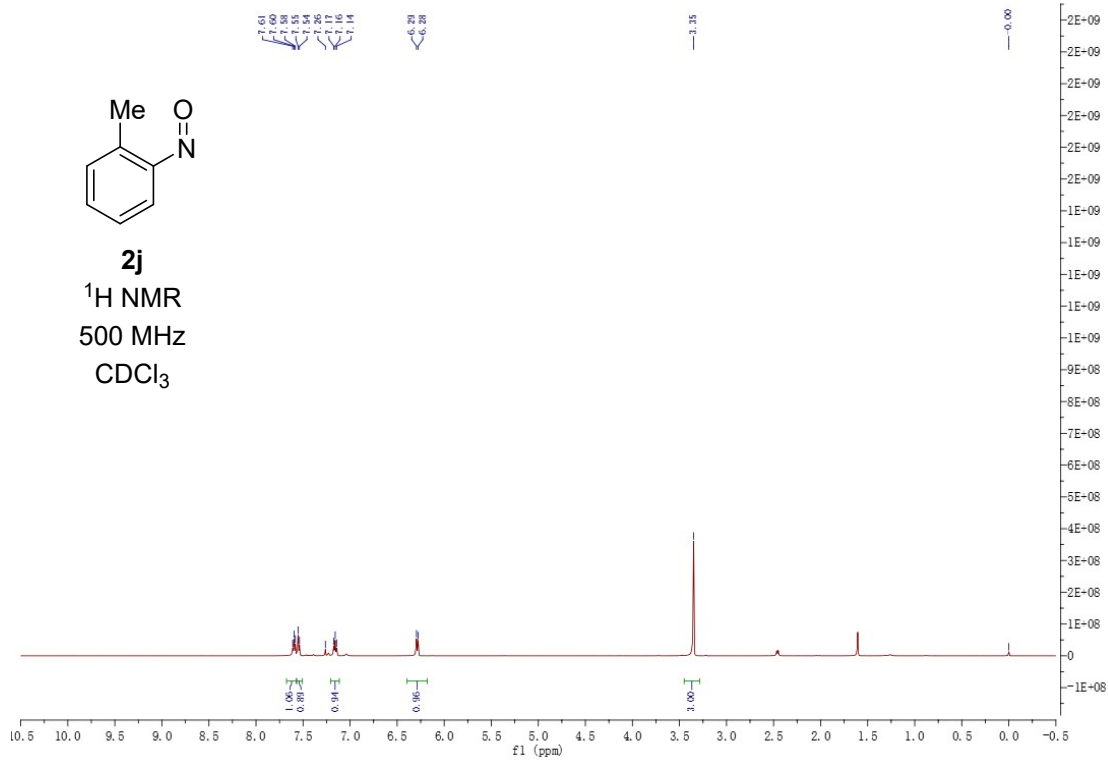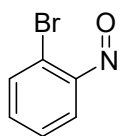

**2k**

<sup>1</sup>H NMR  
400 MHz  
CDCl<sub>3</sub>

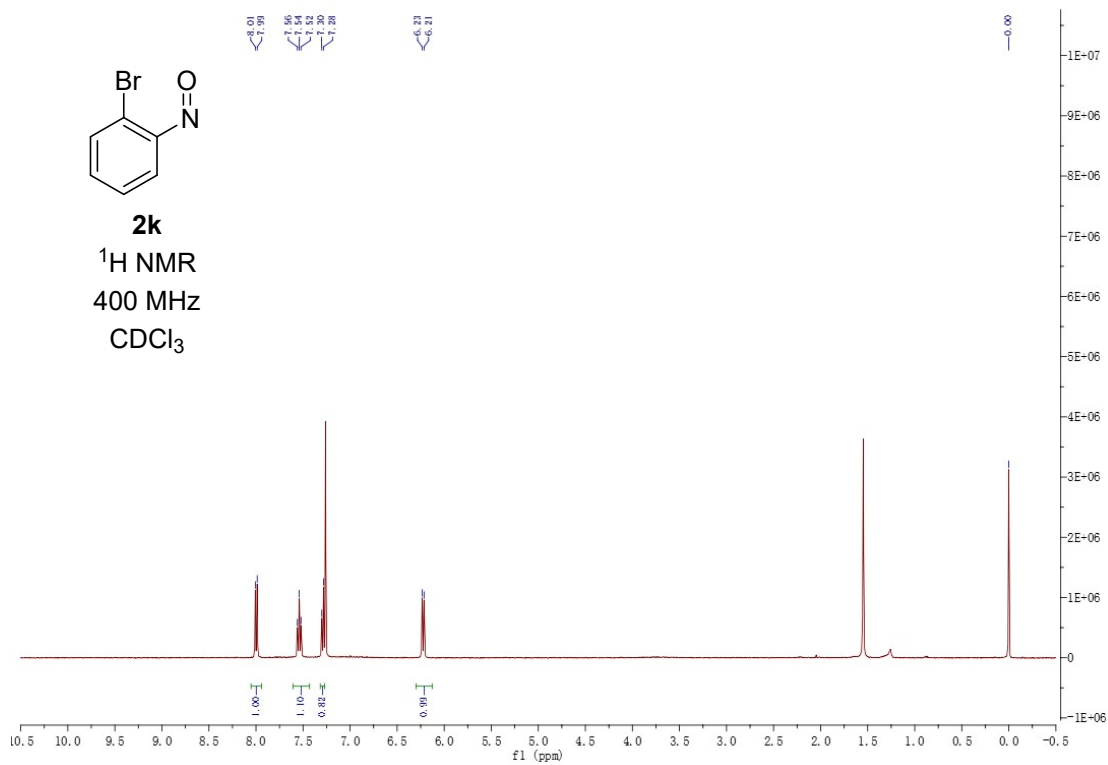

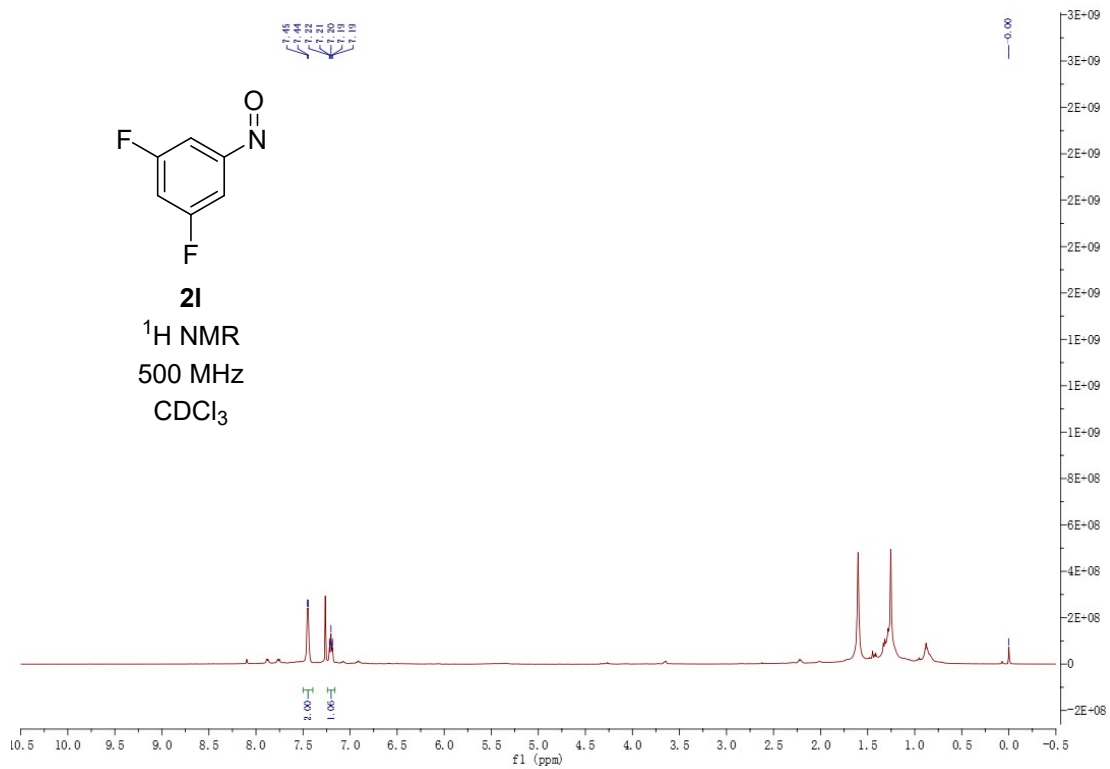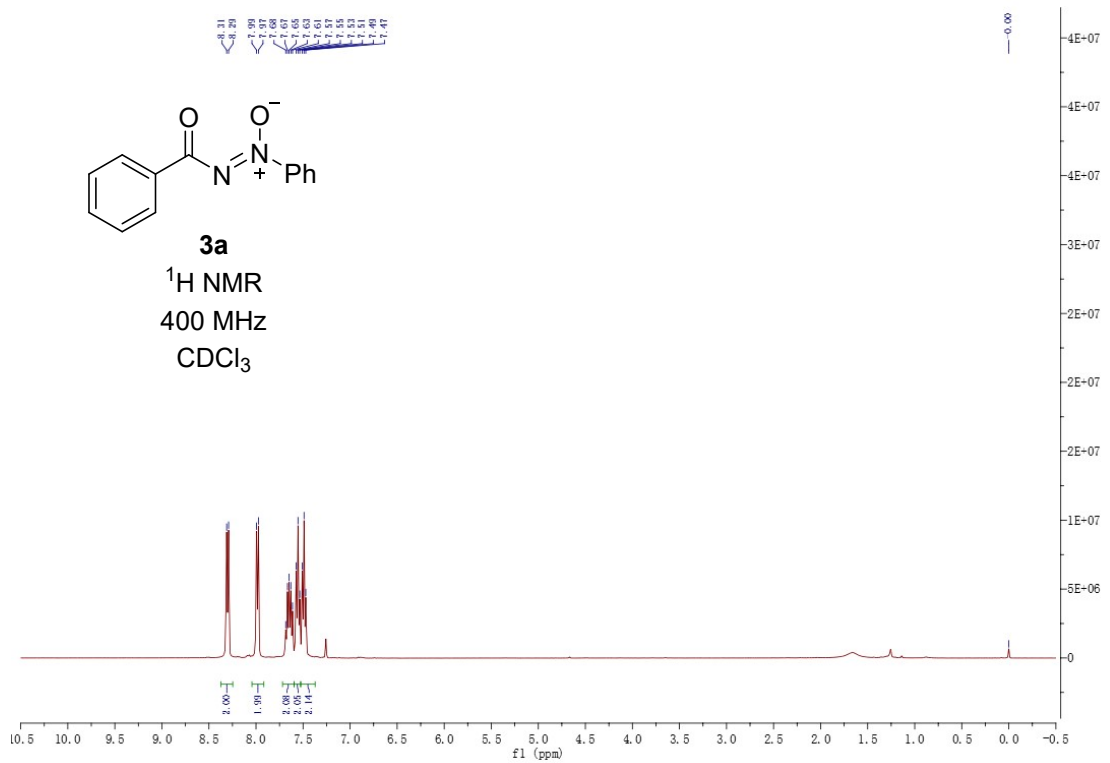



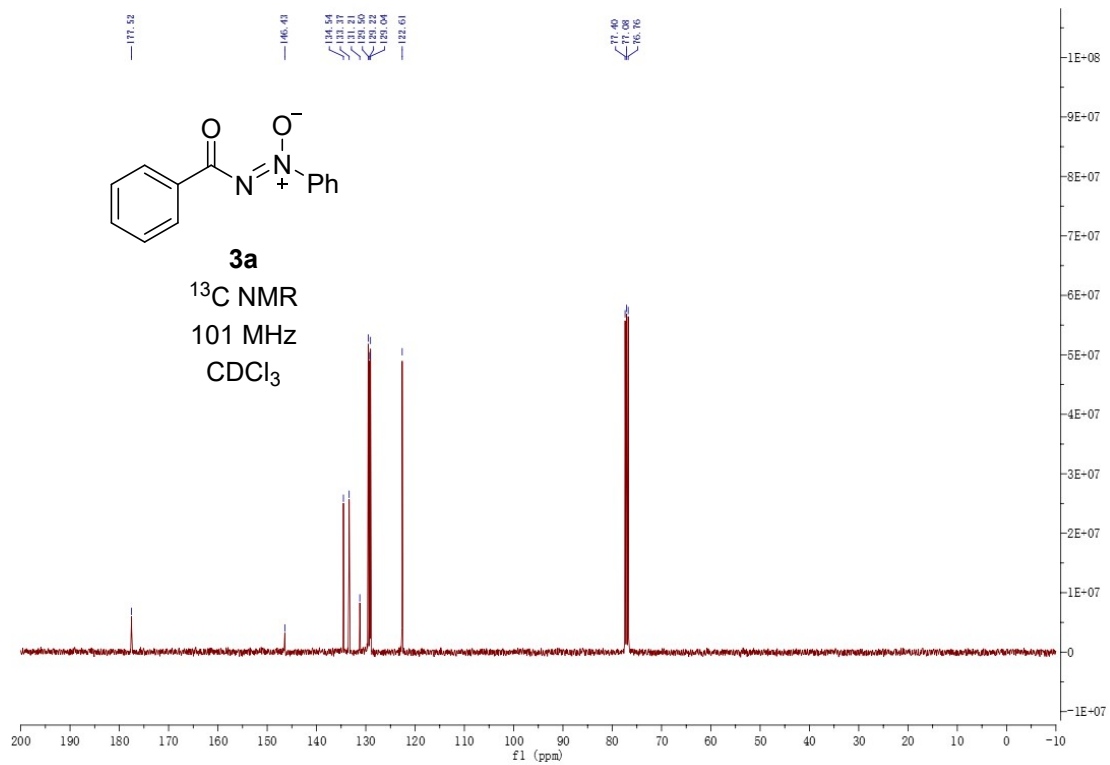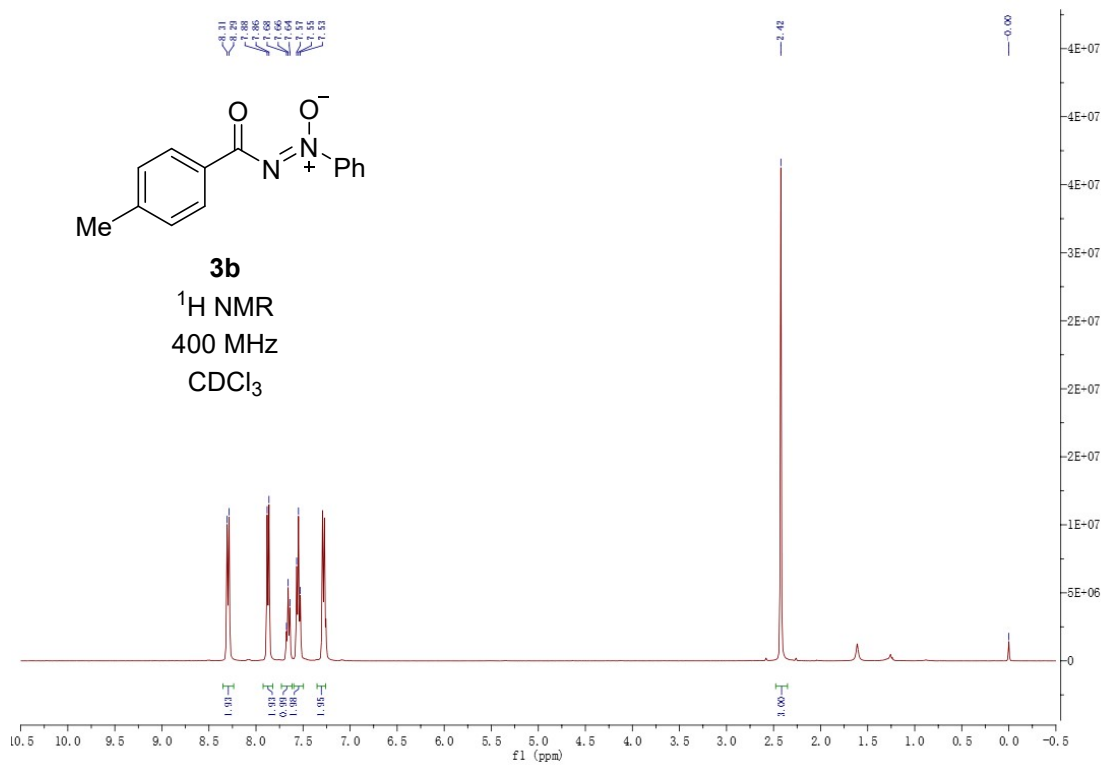

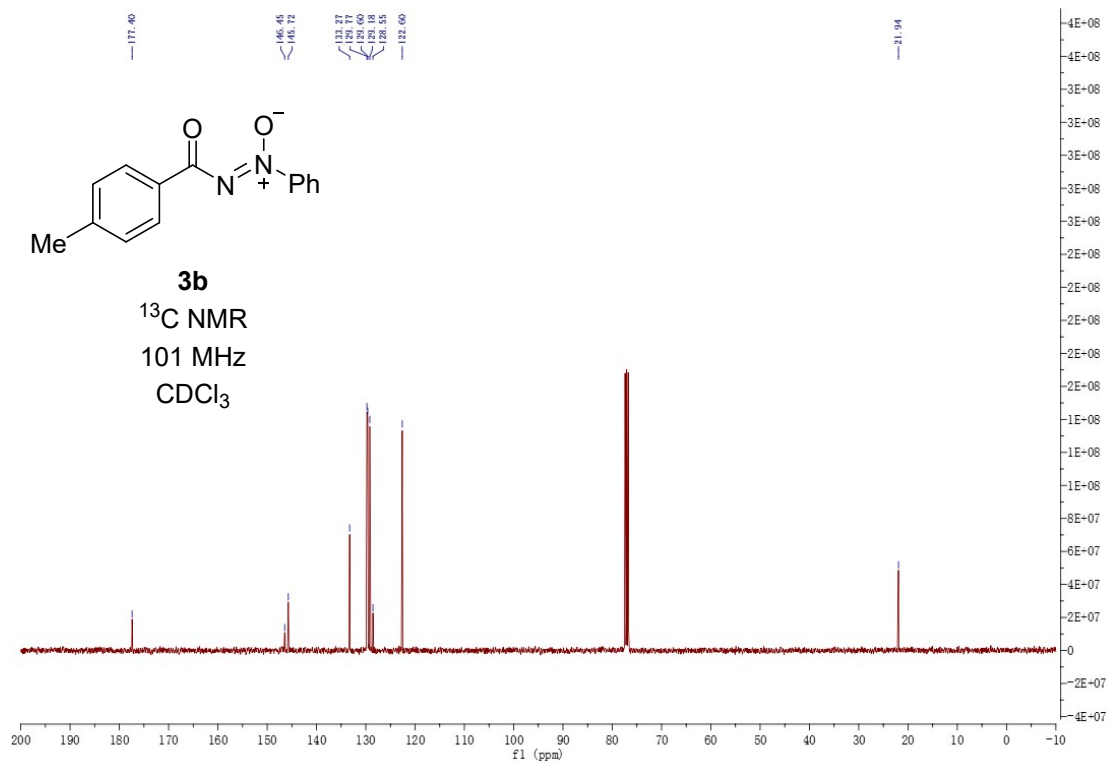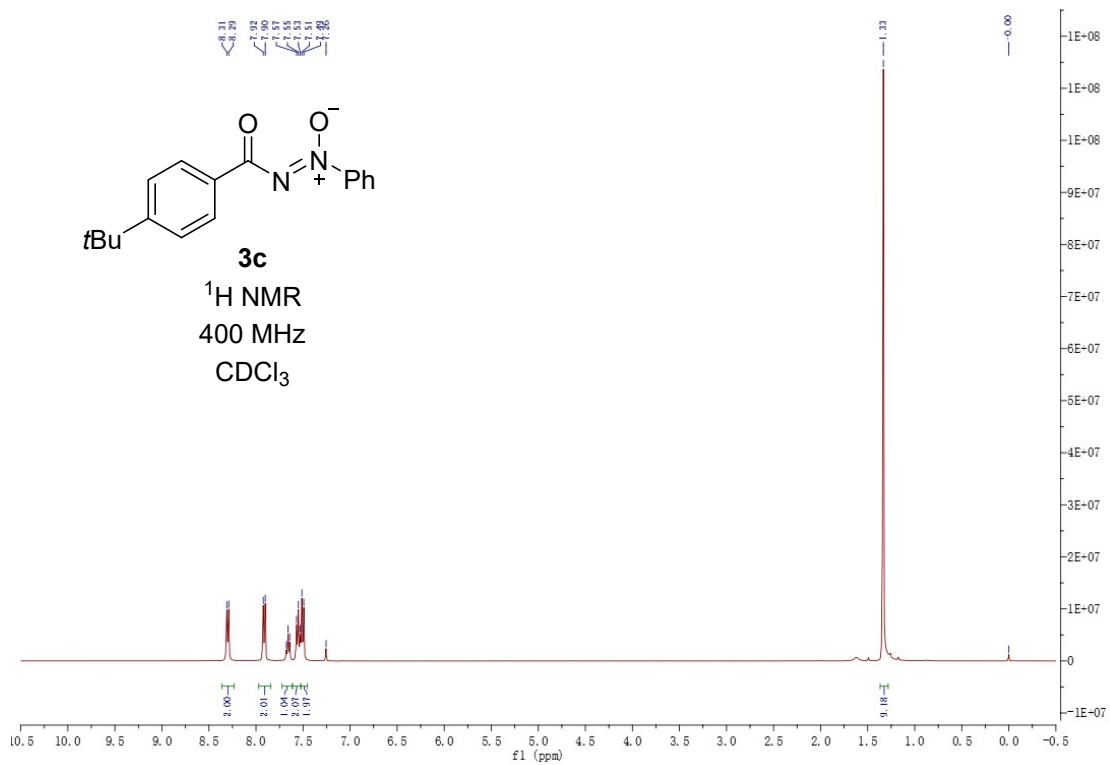

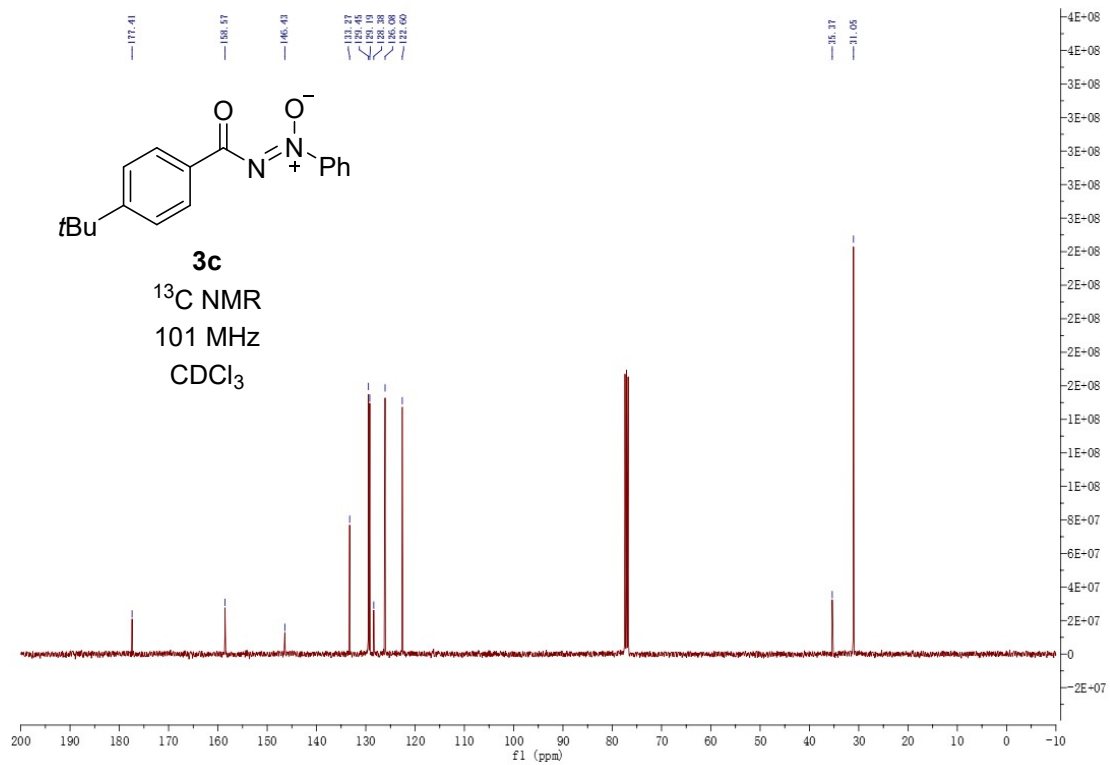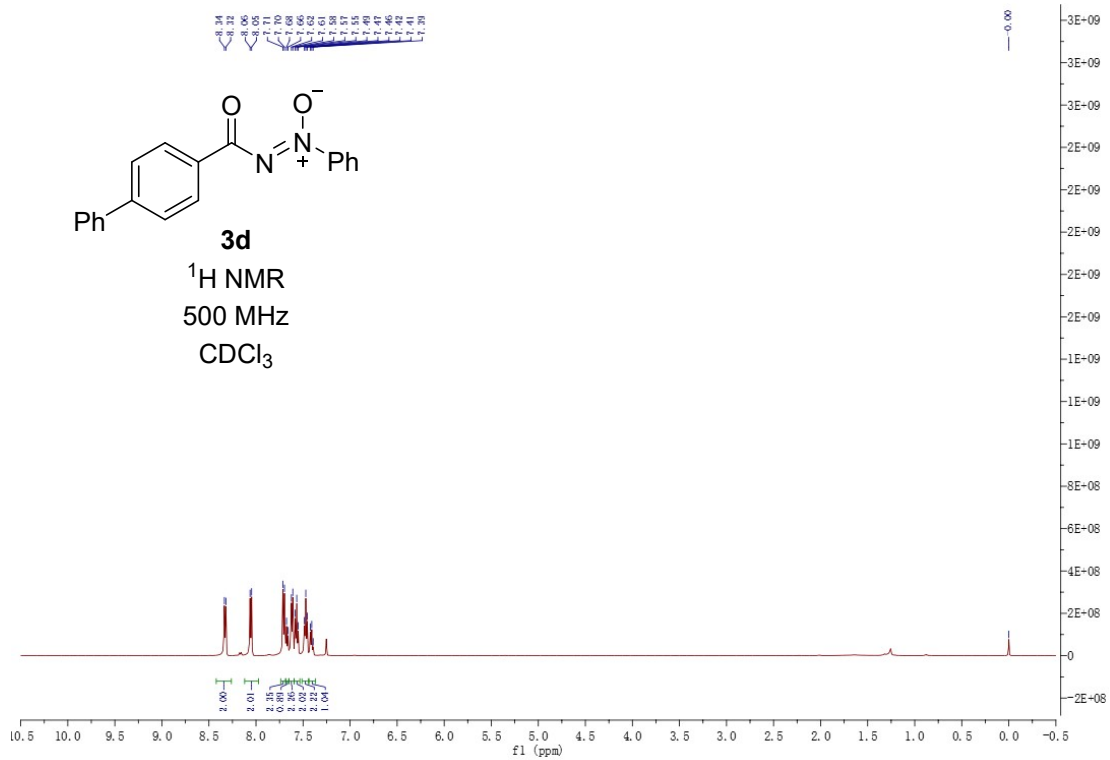

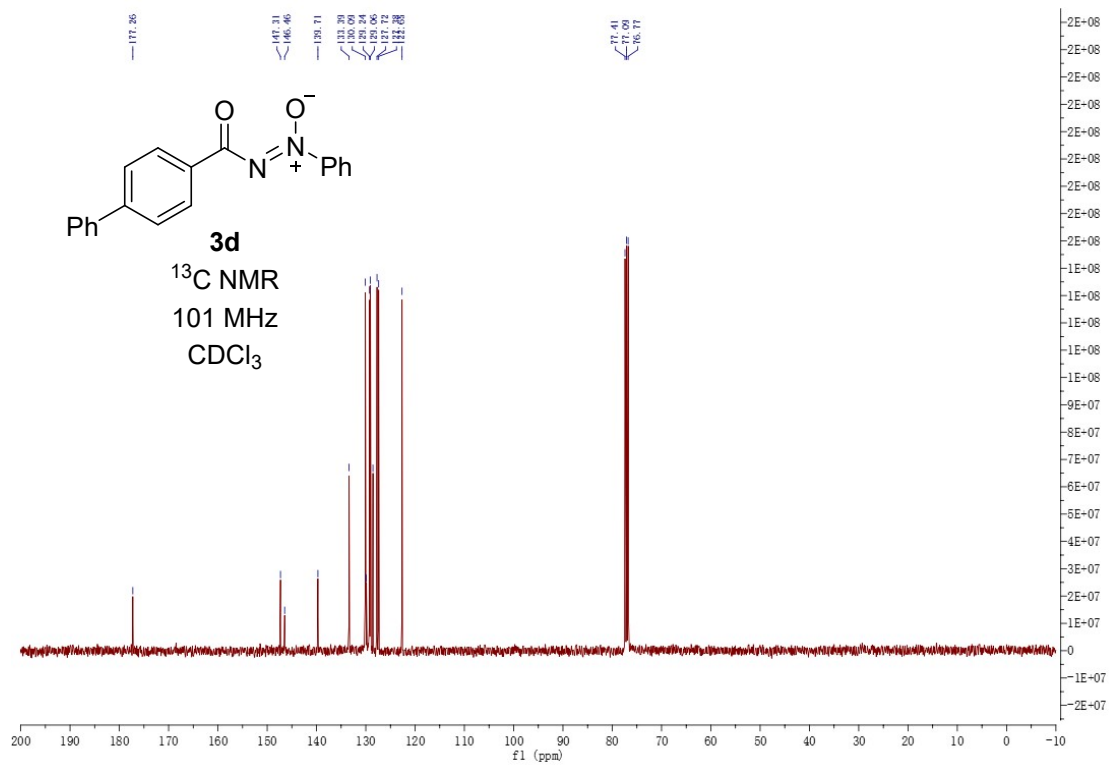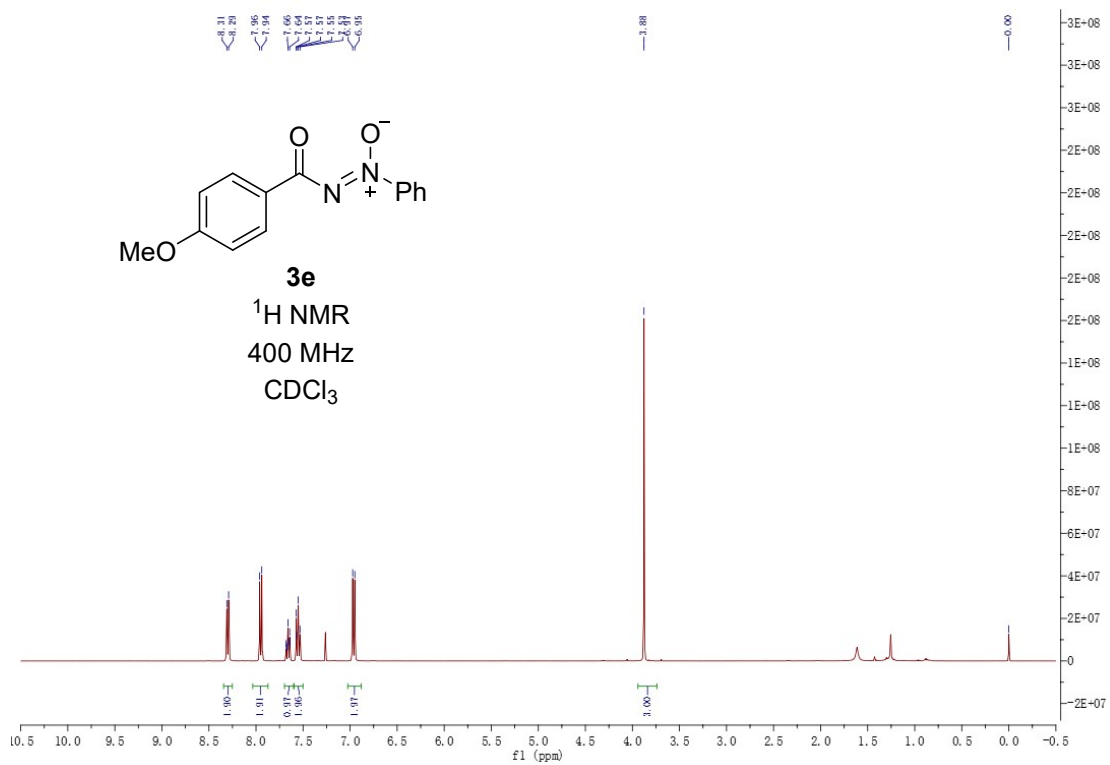

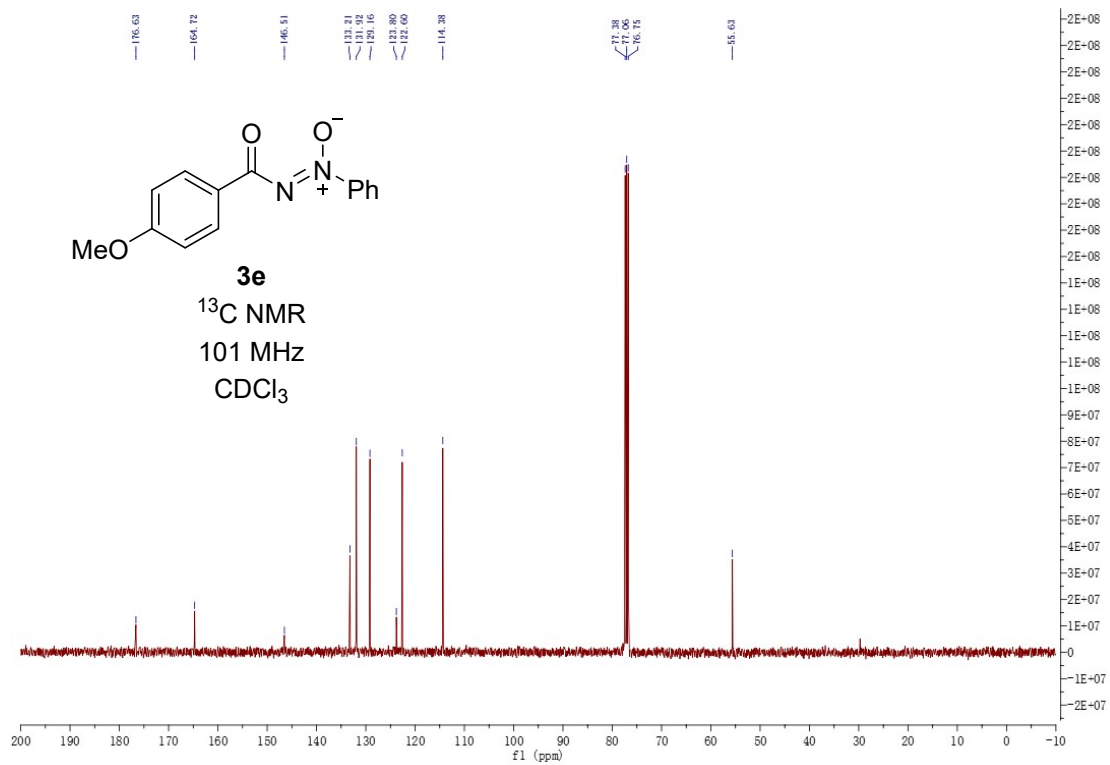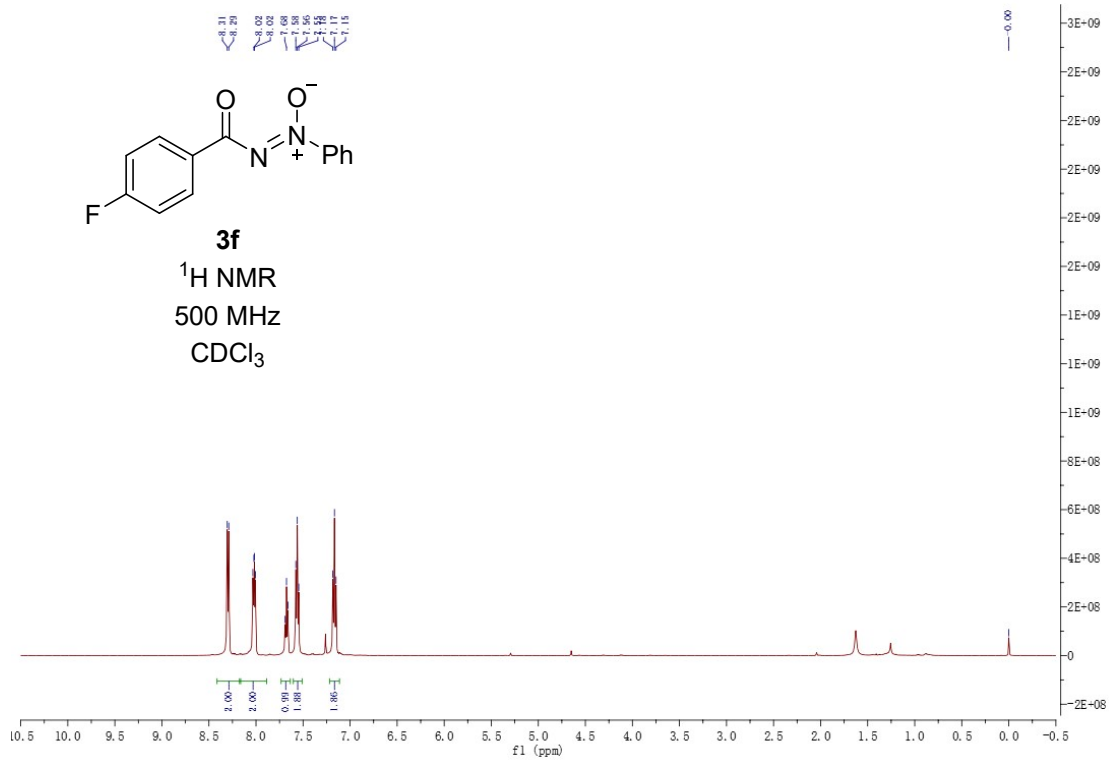

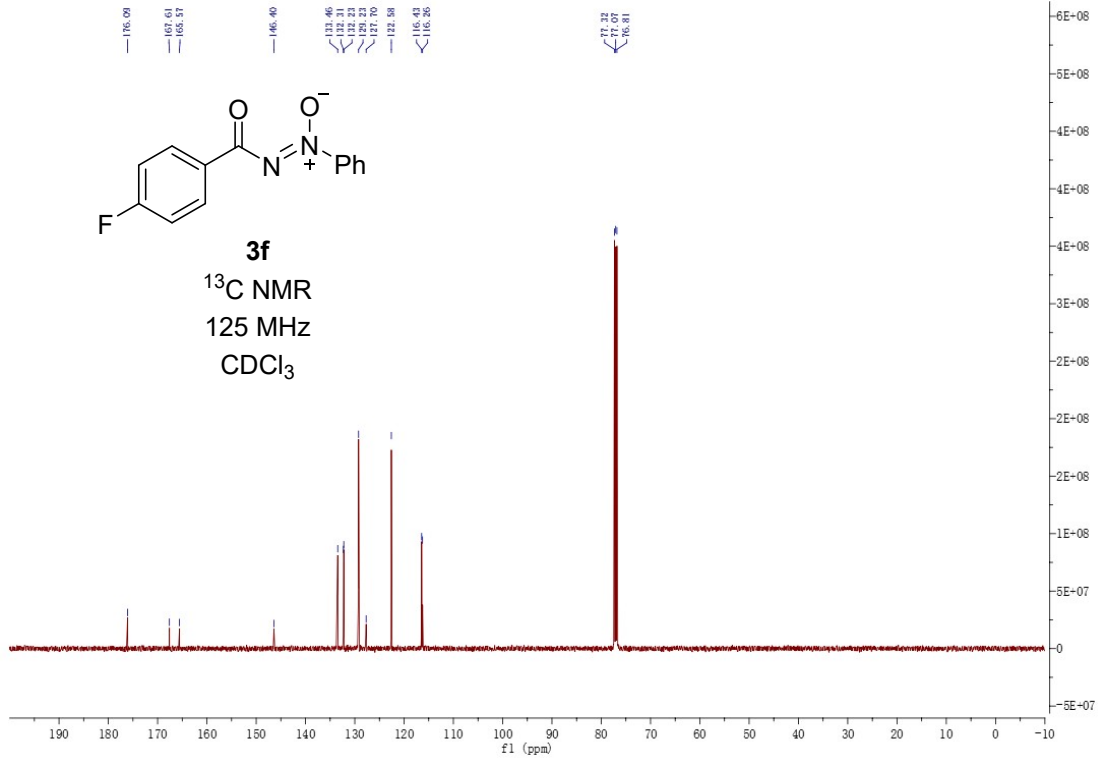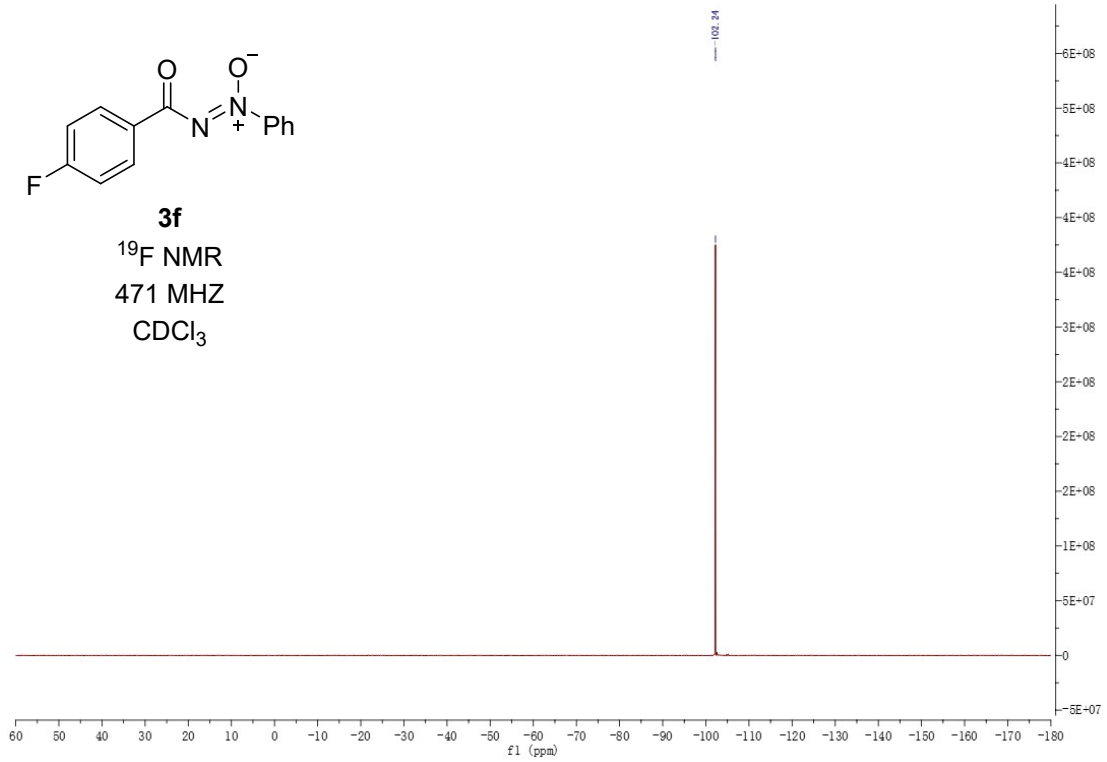

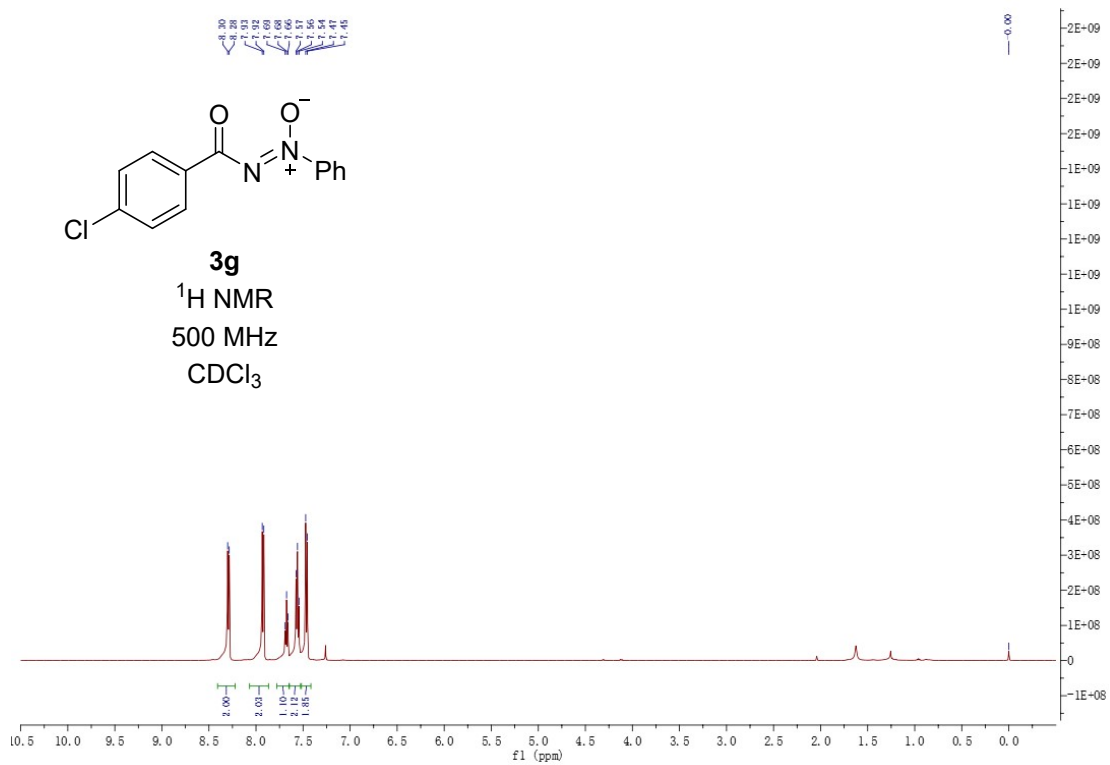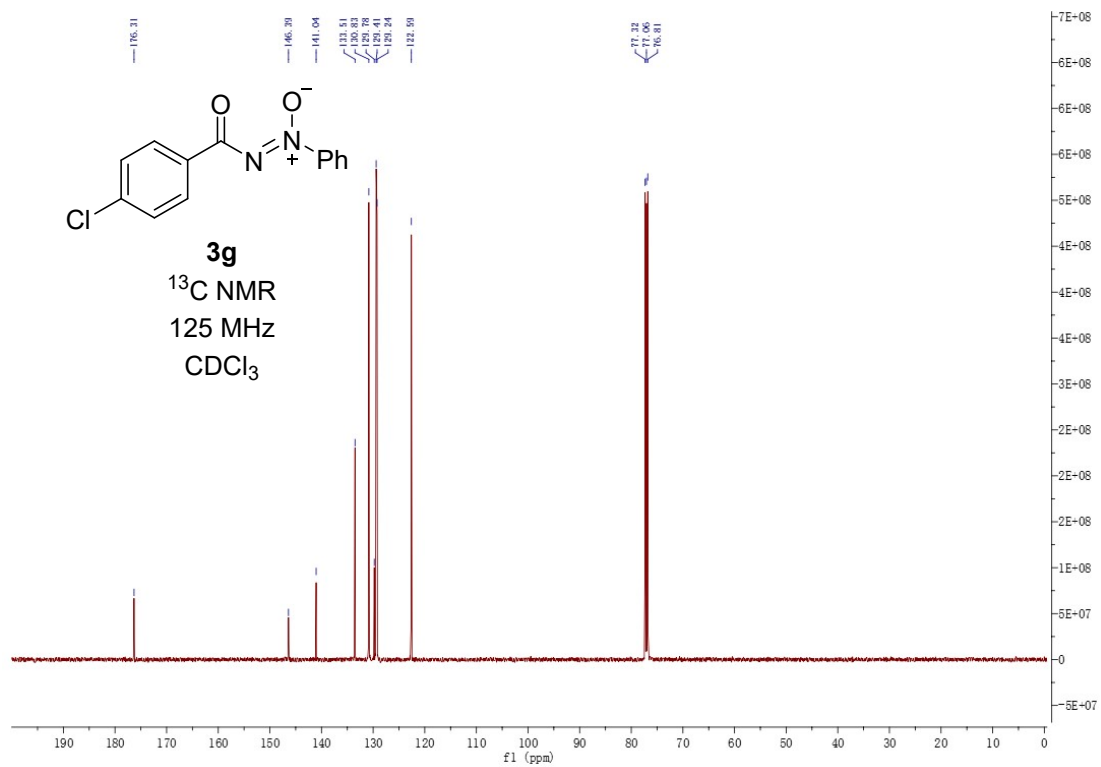

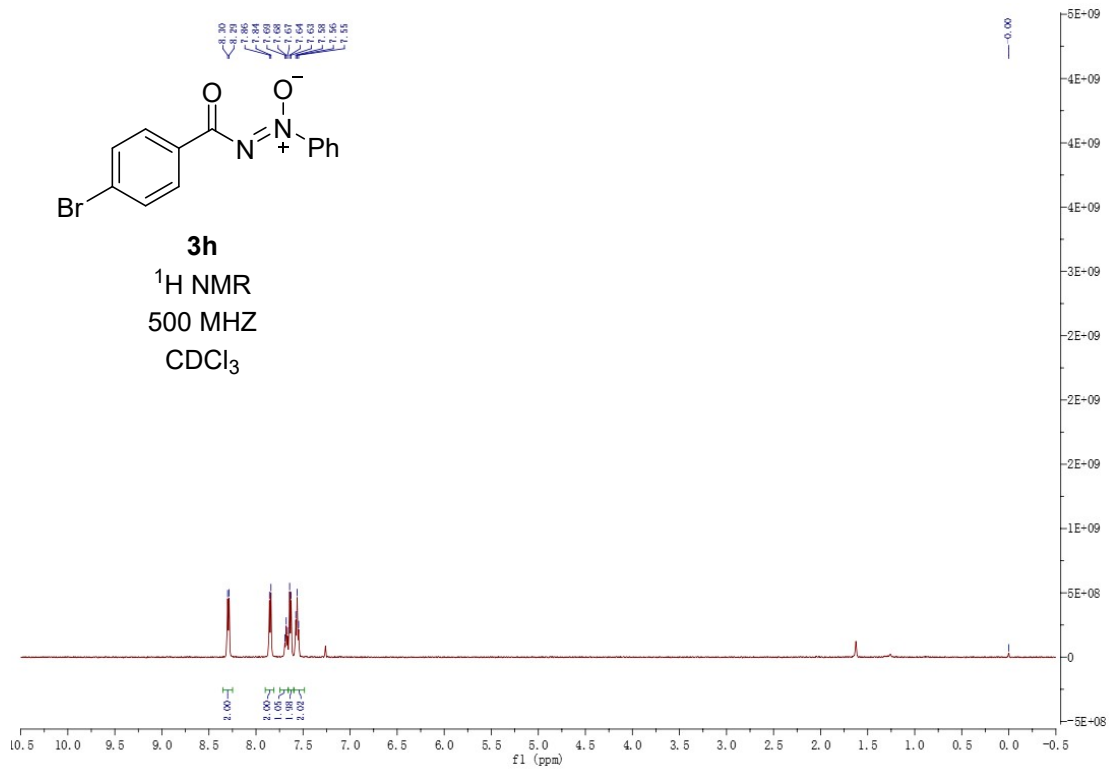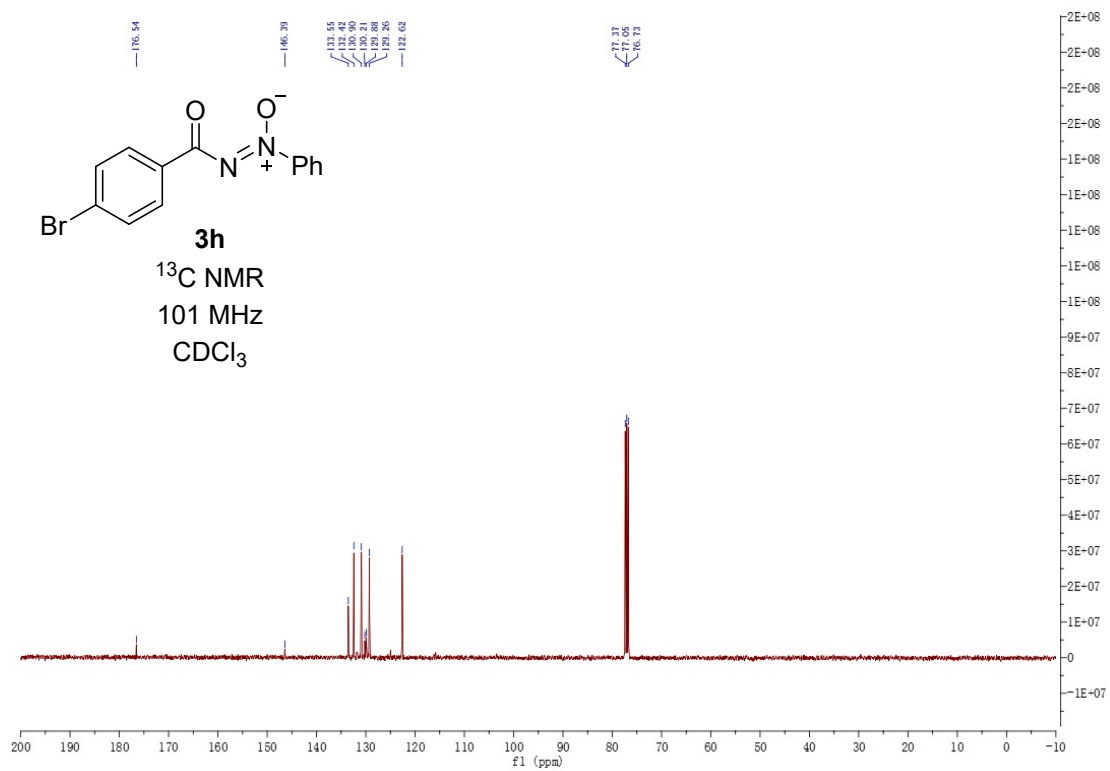



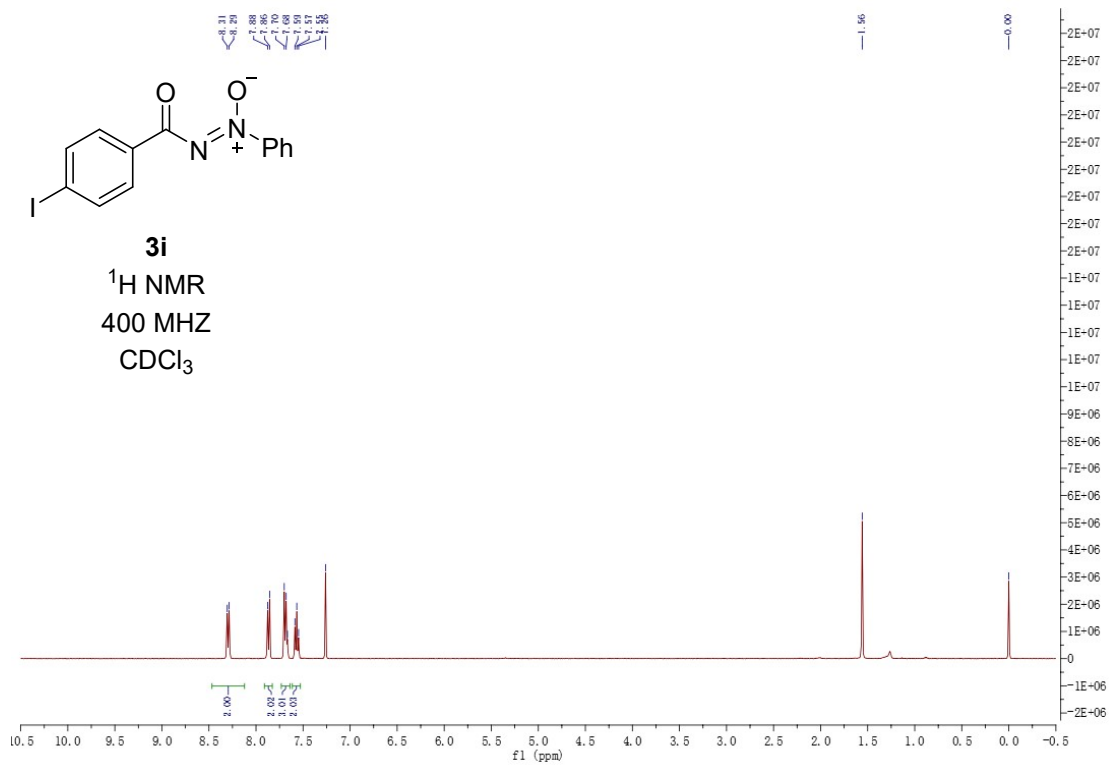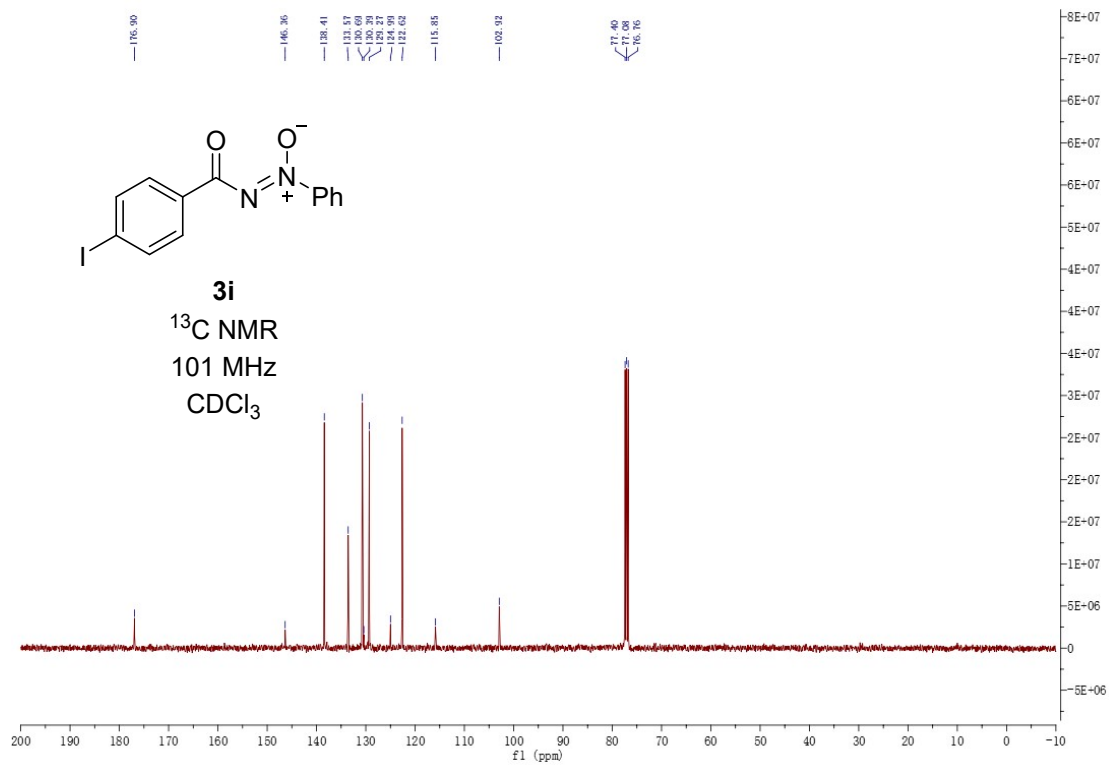

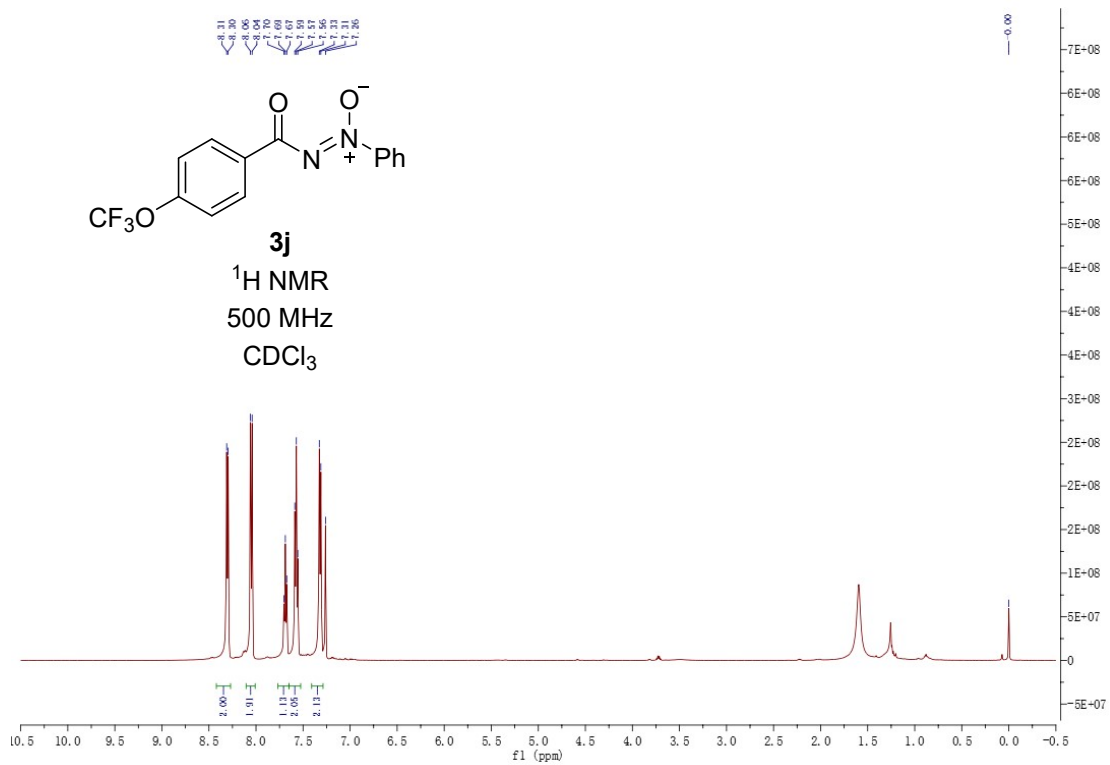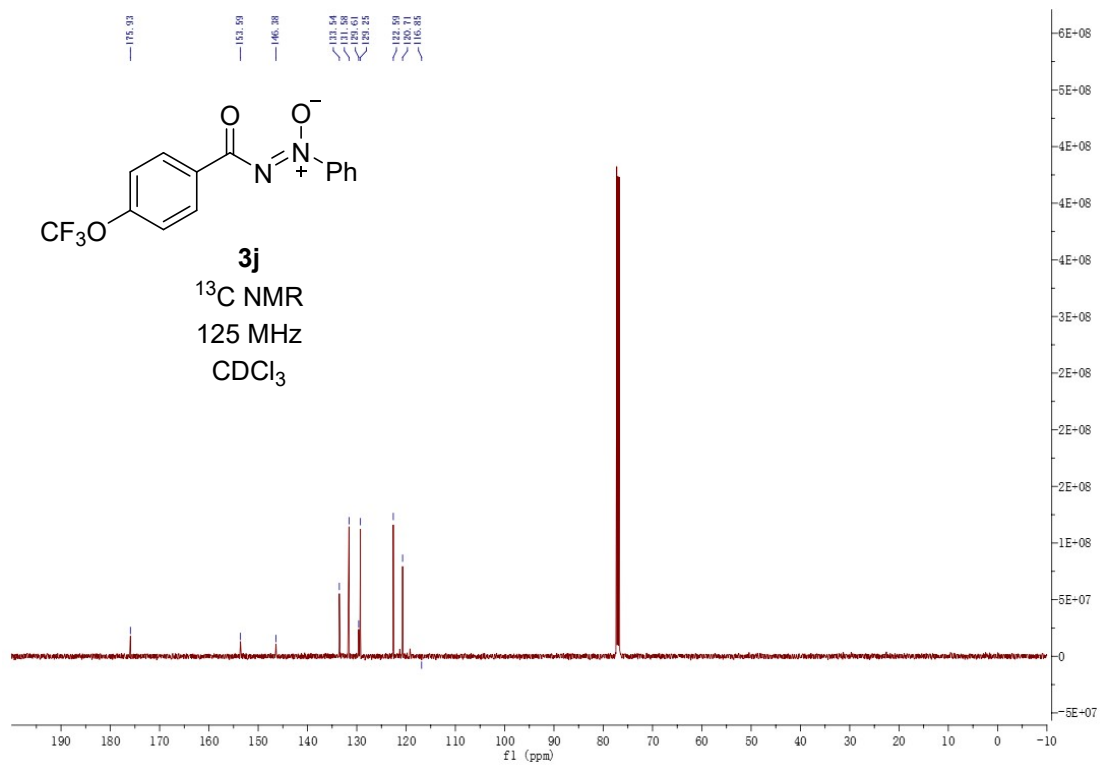

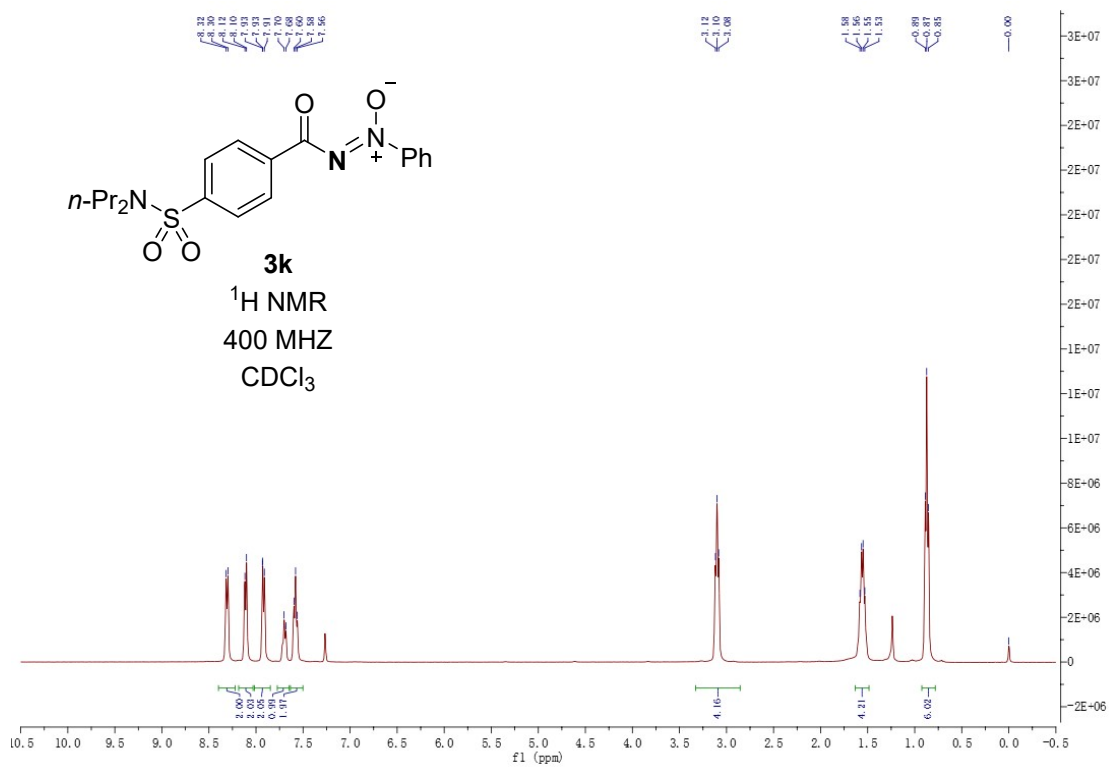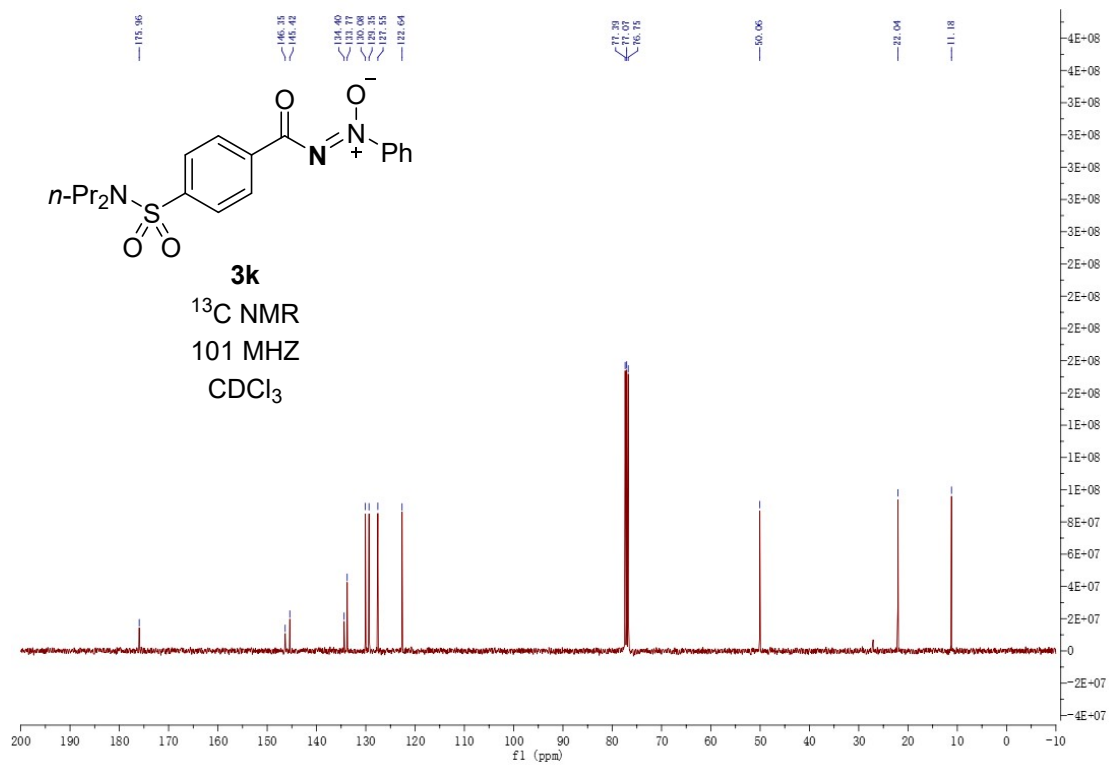

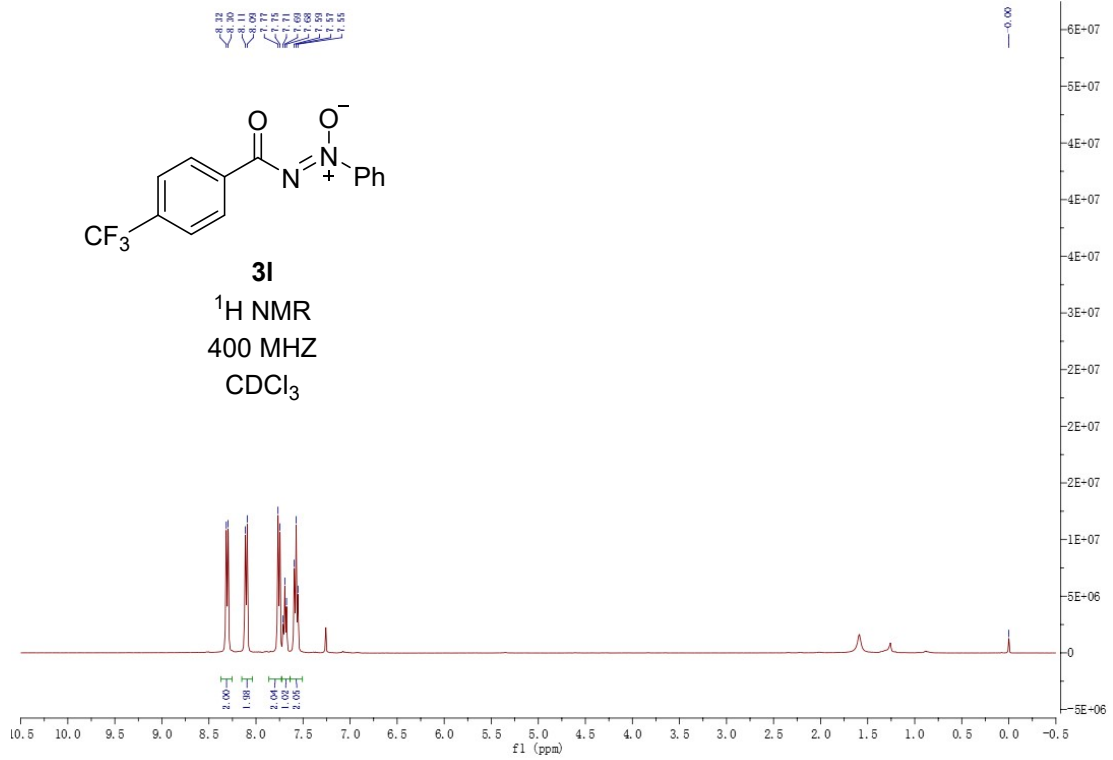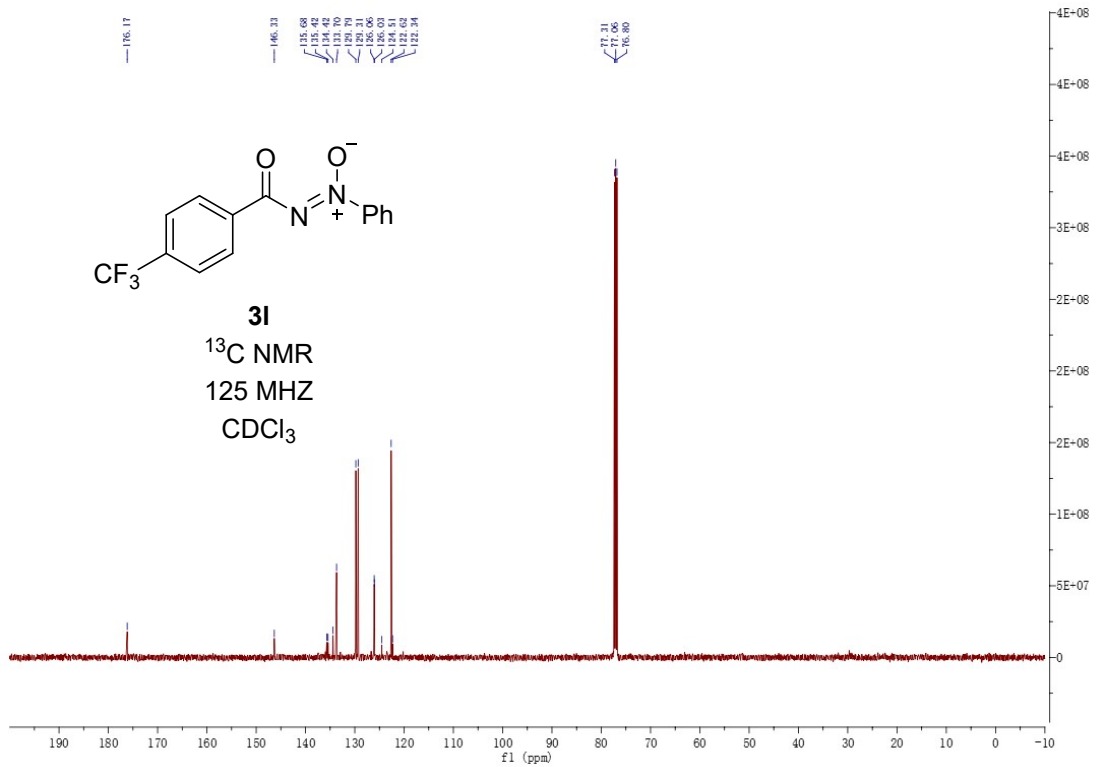

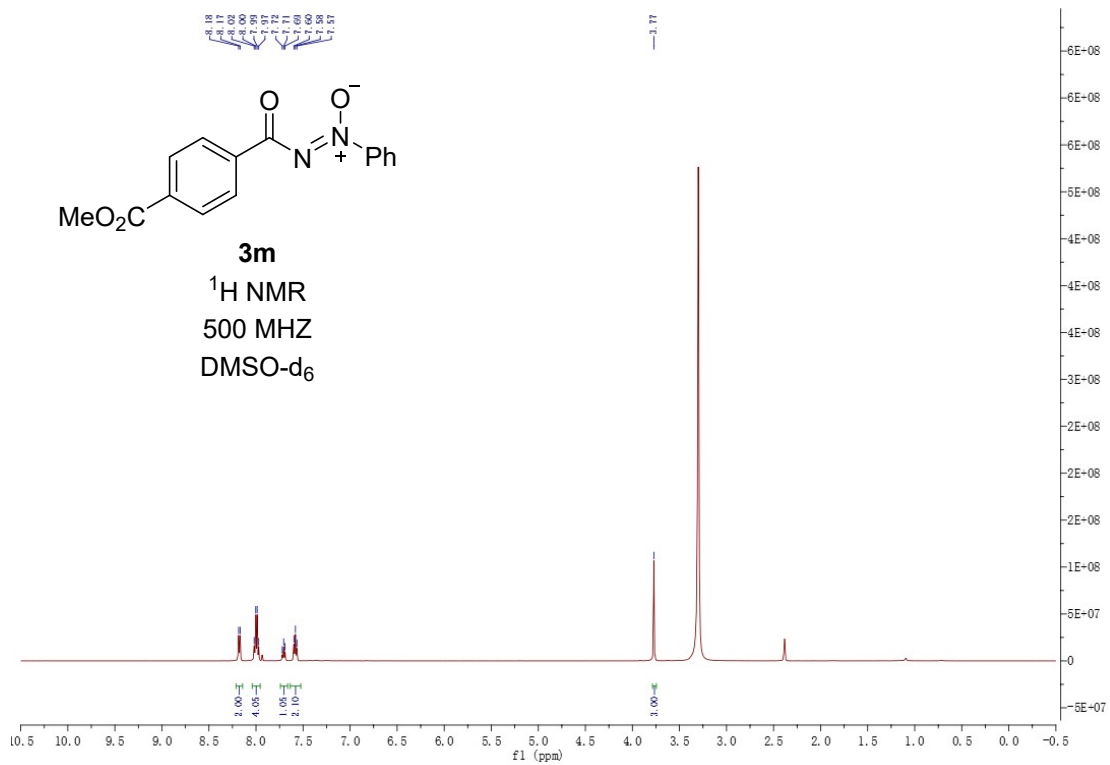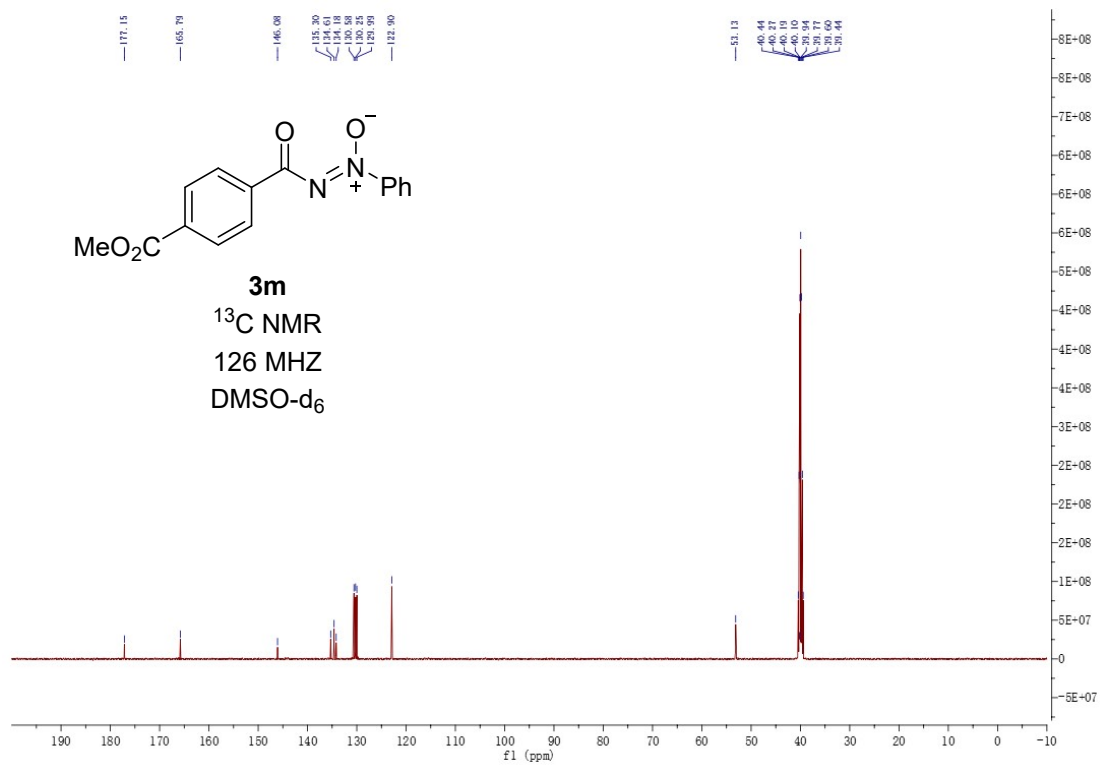

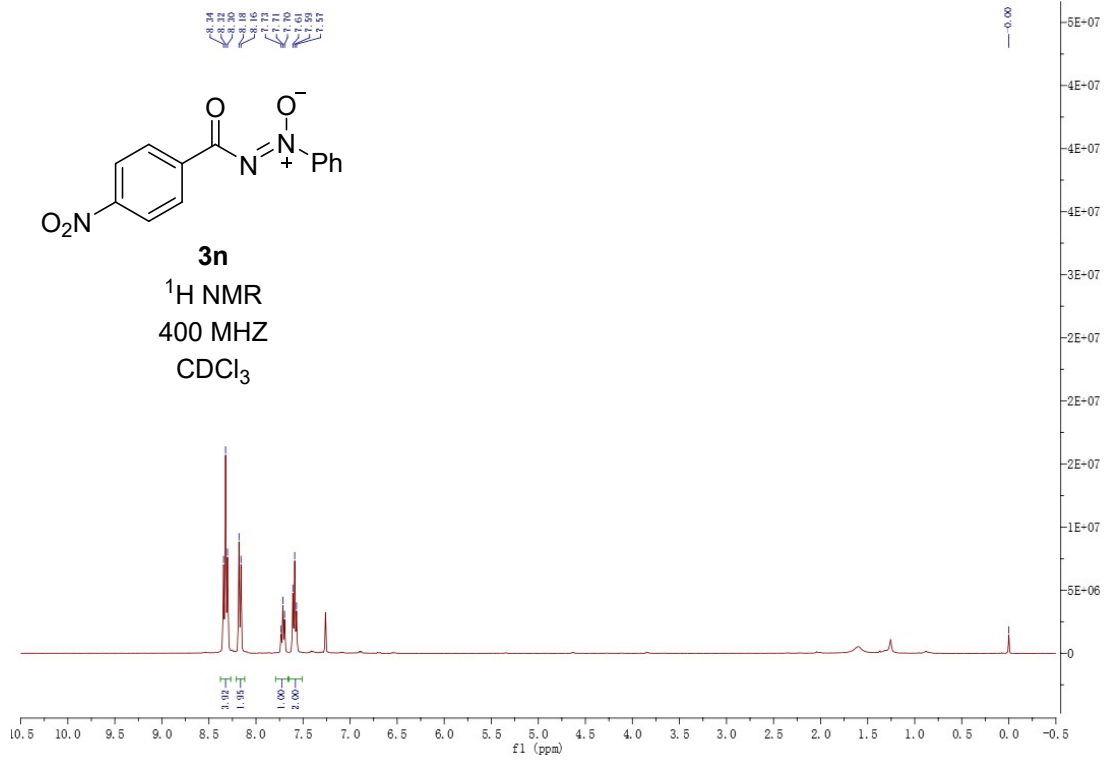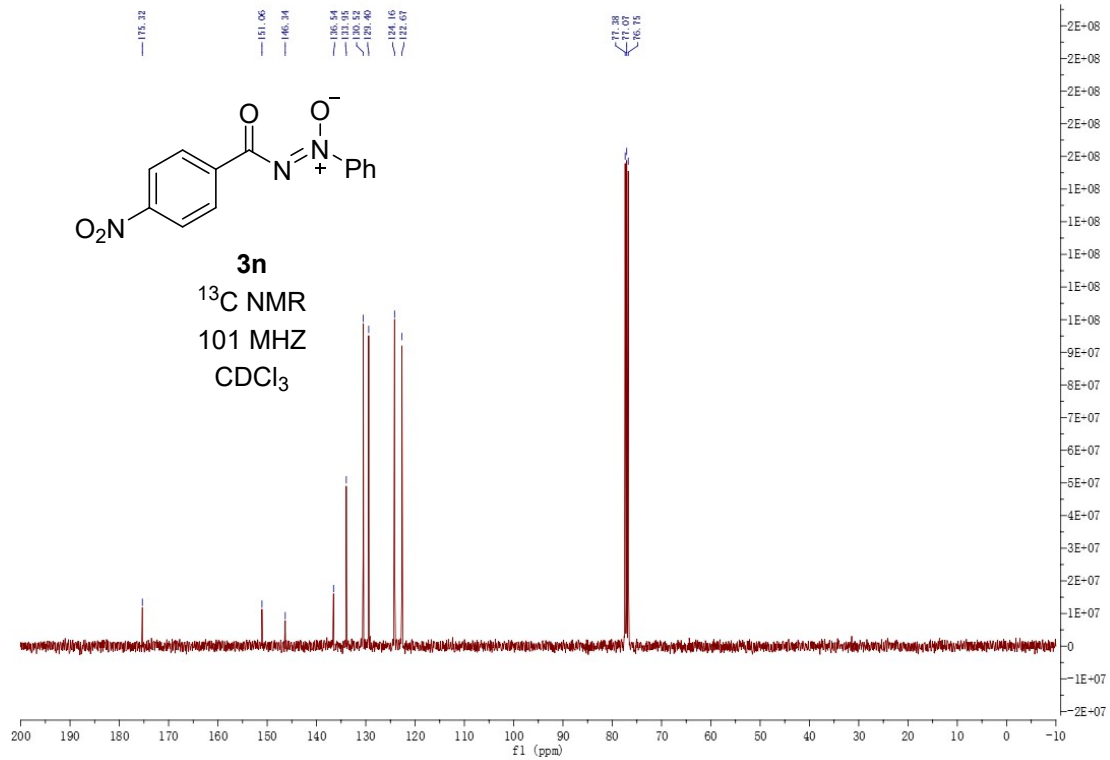

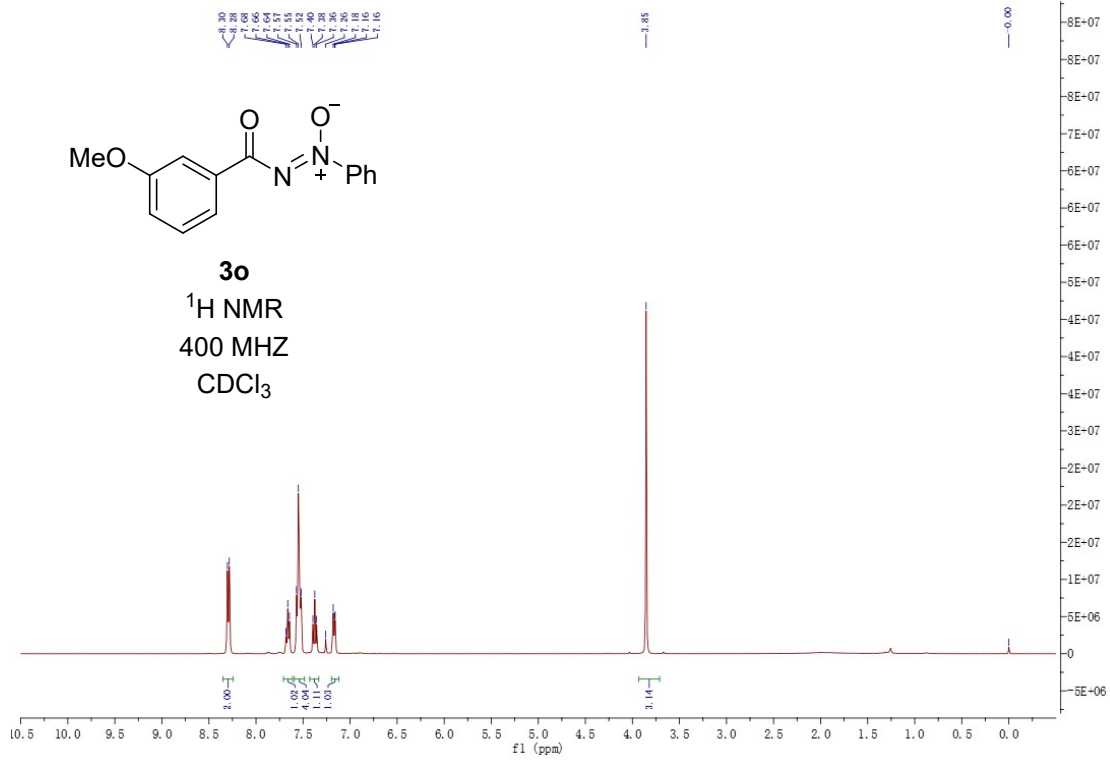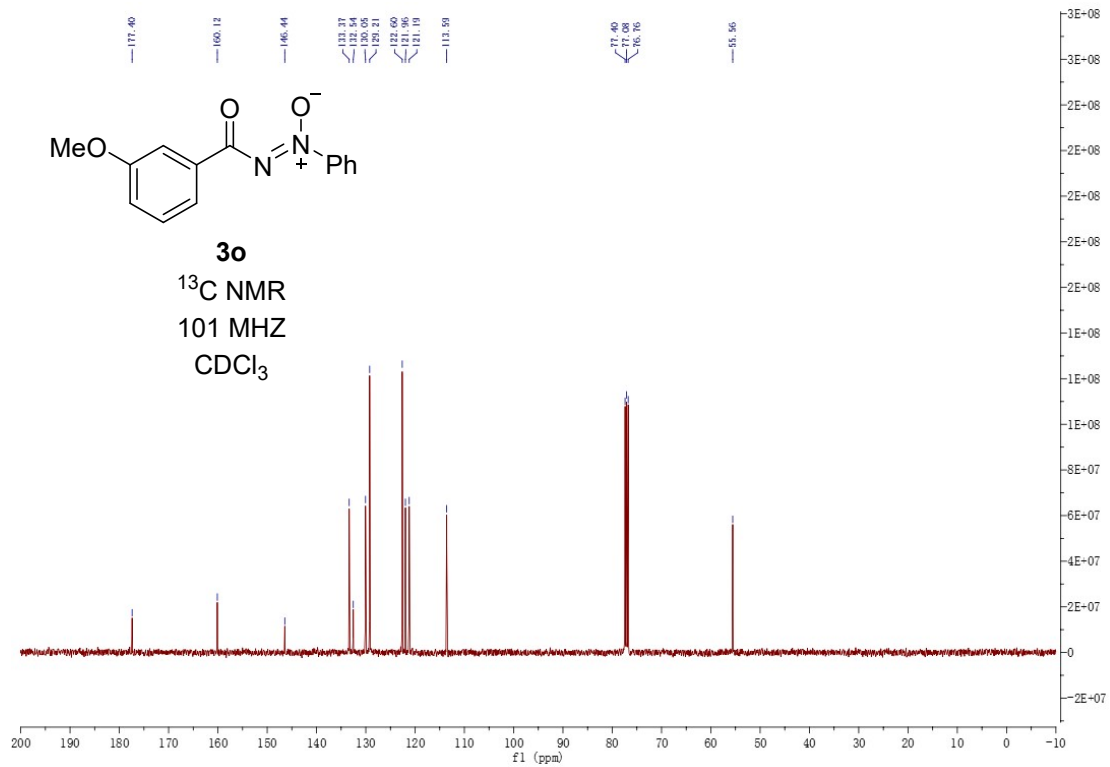

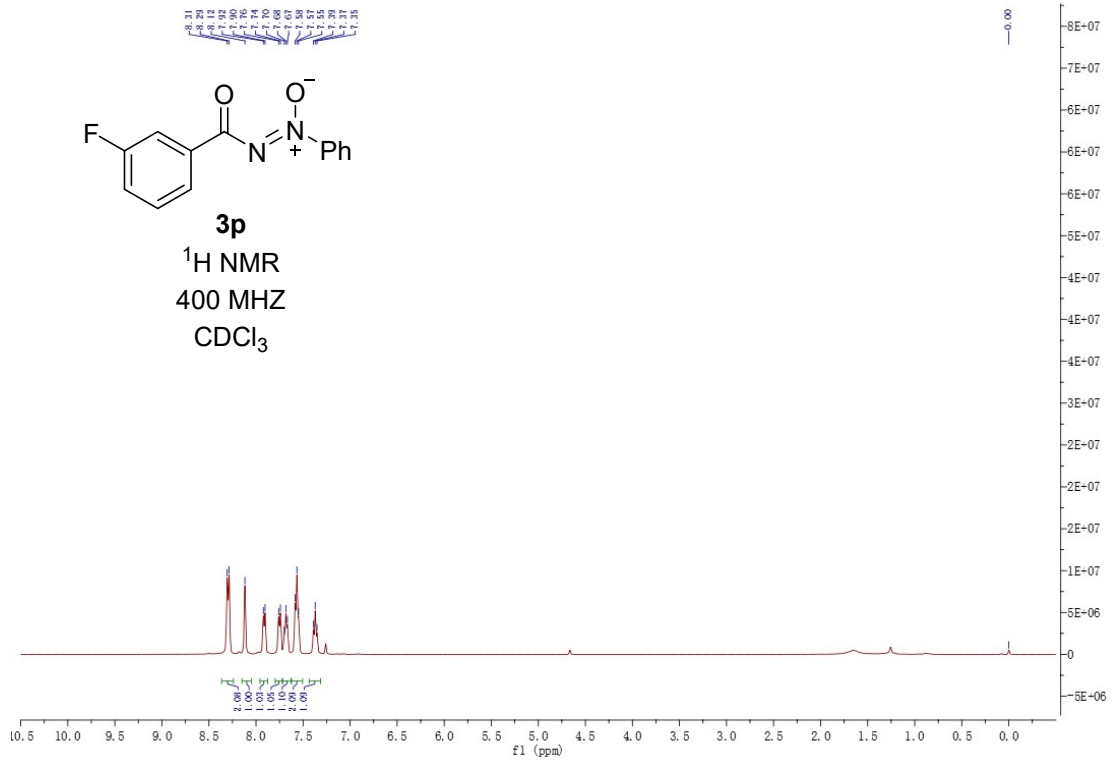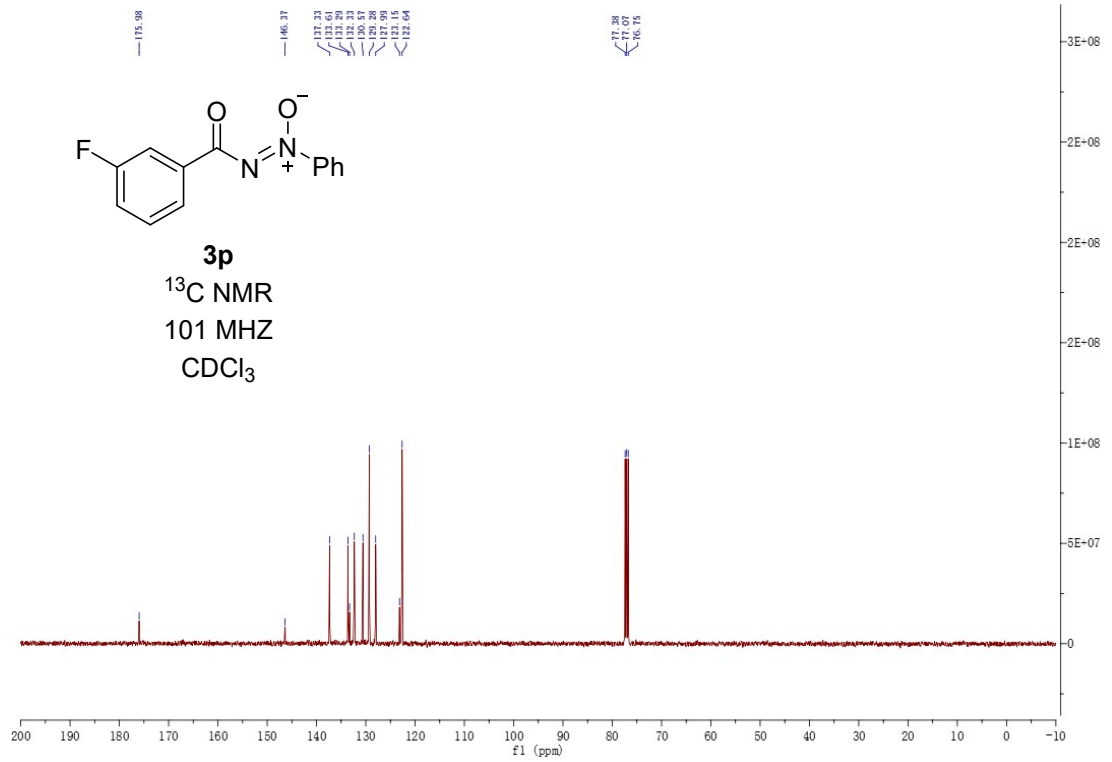







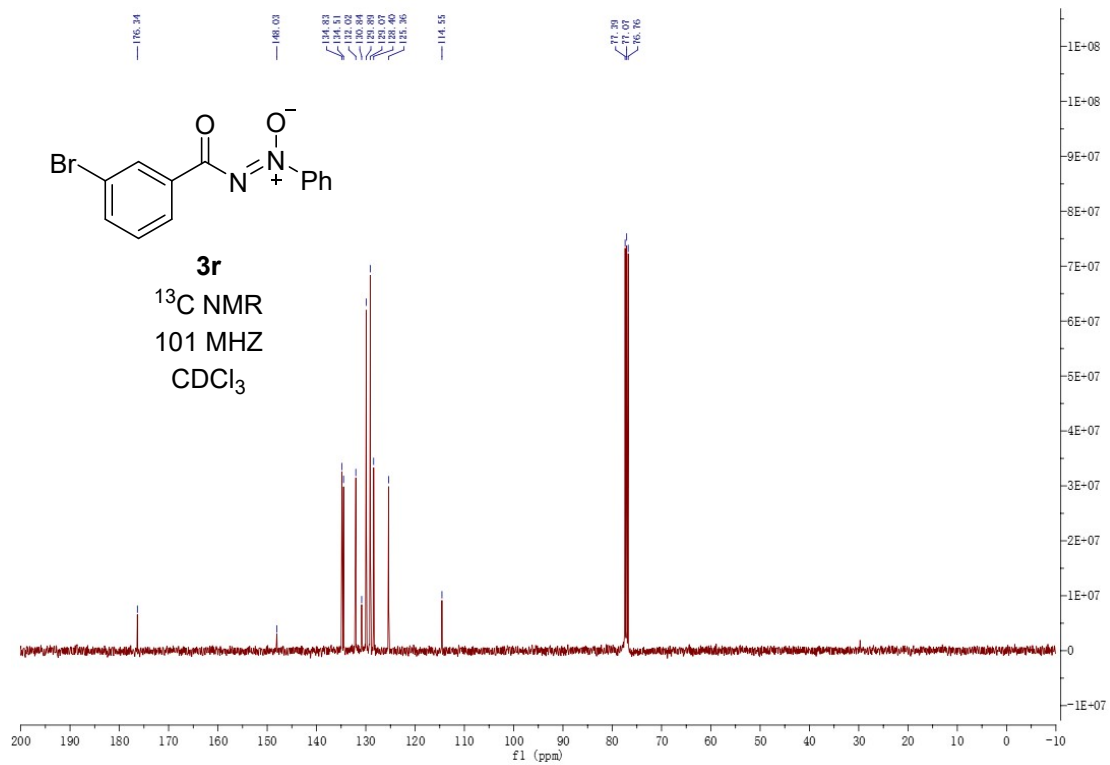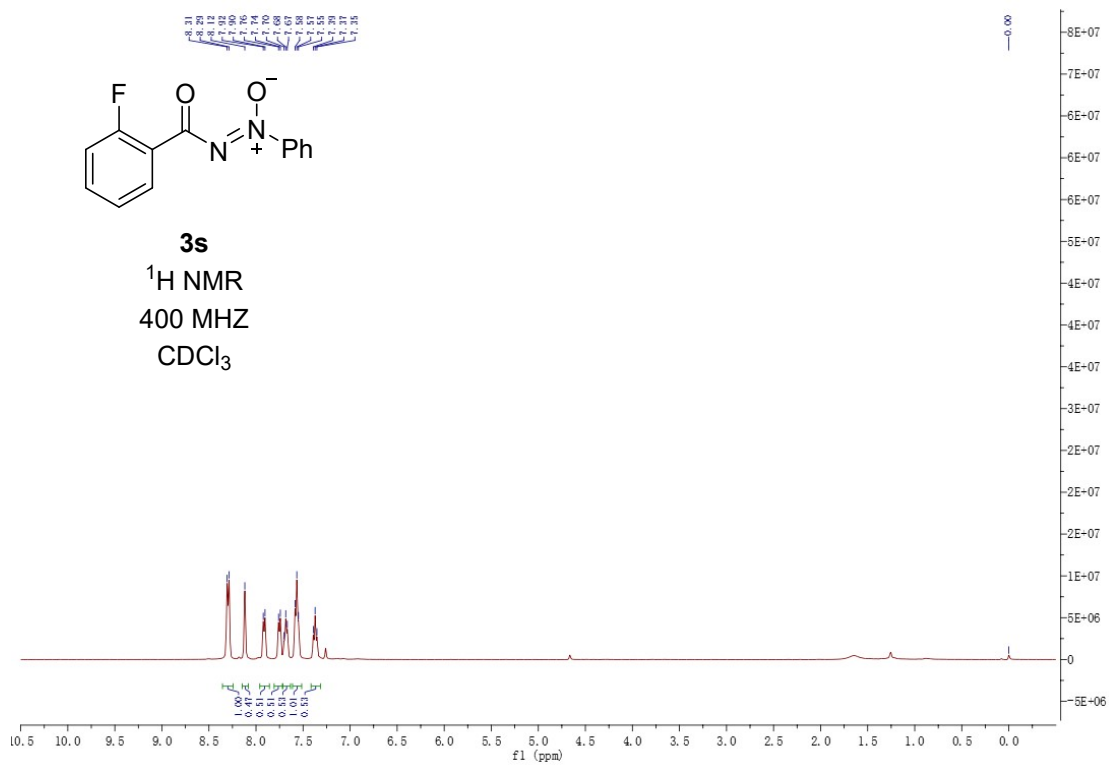

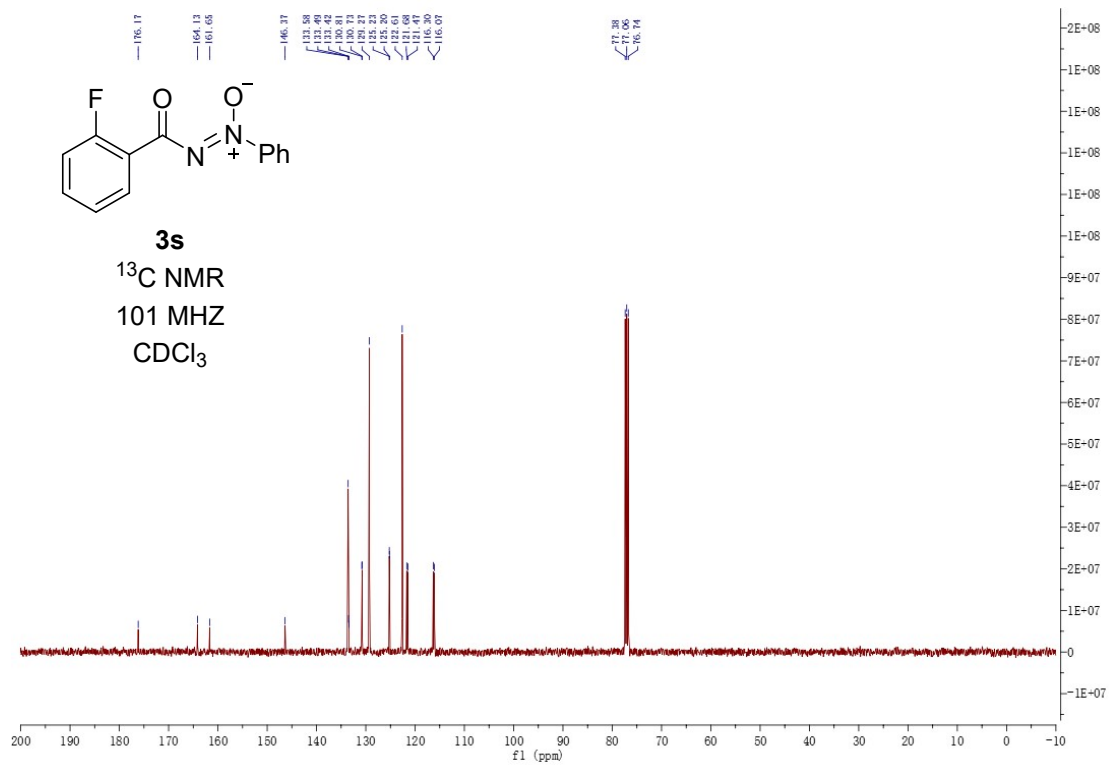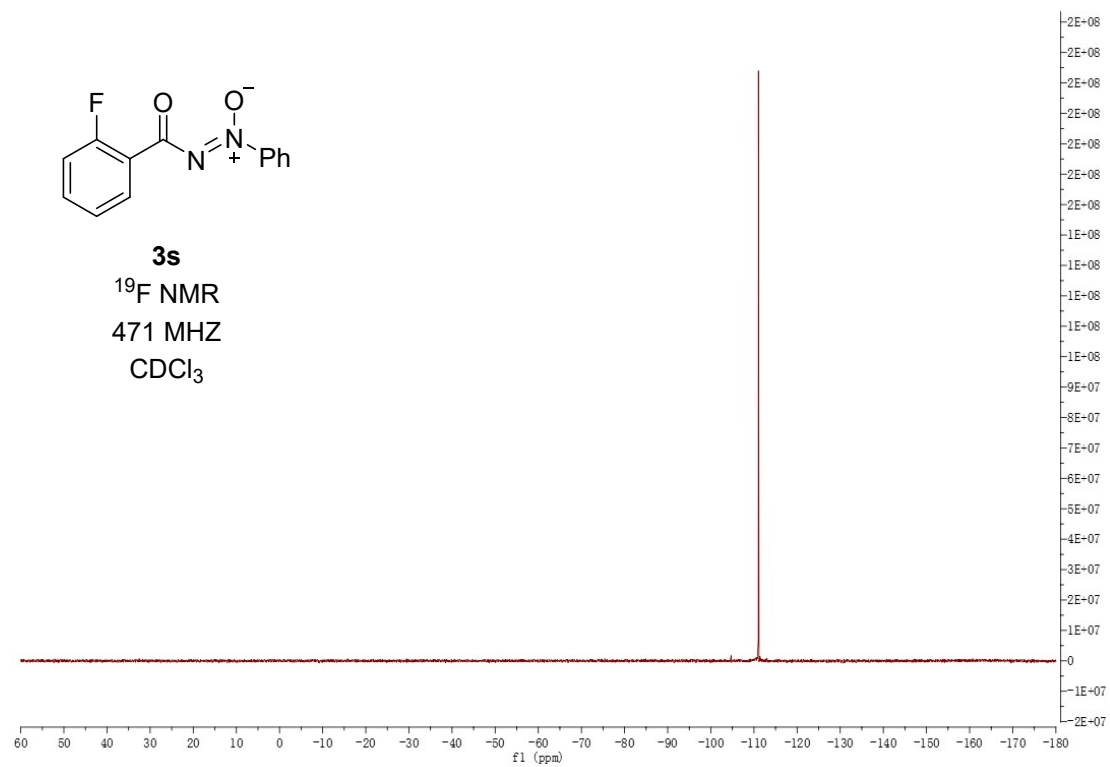

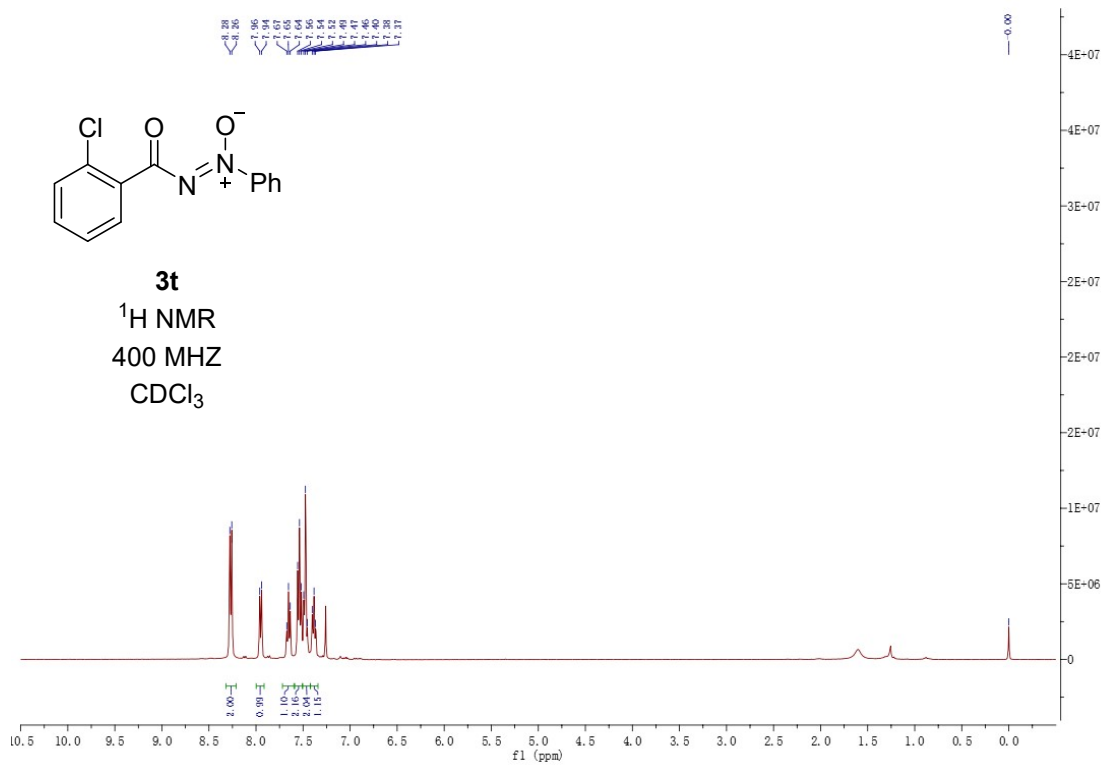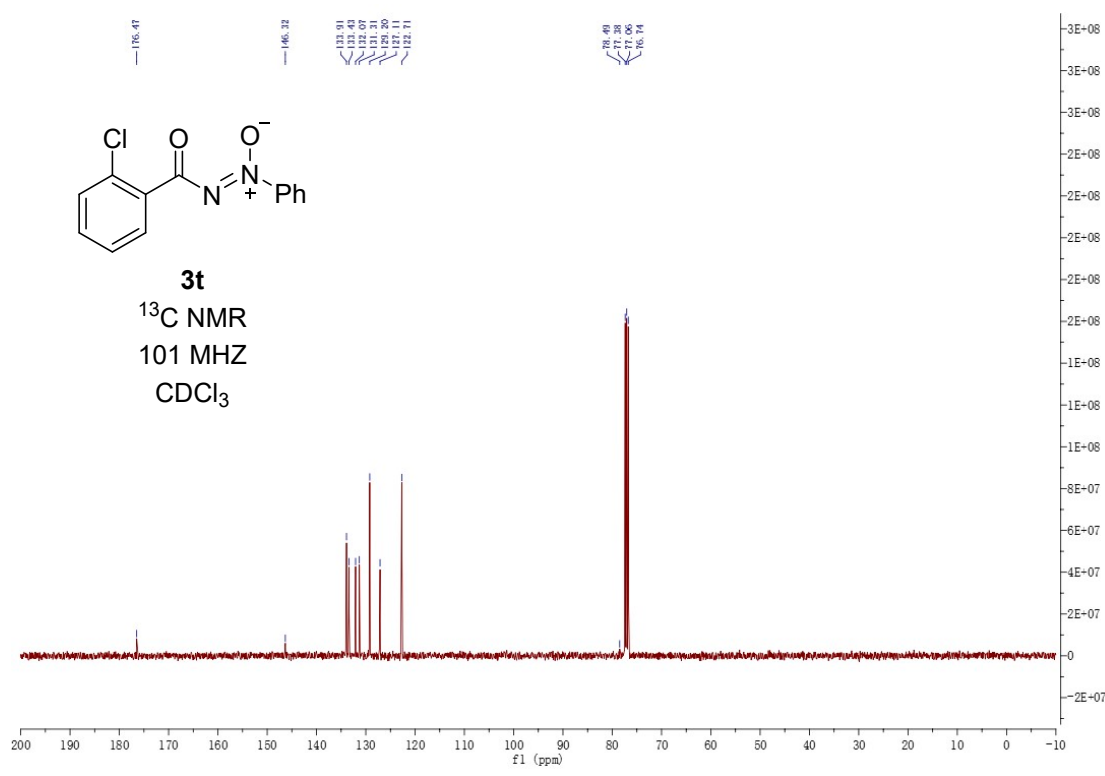

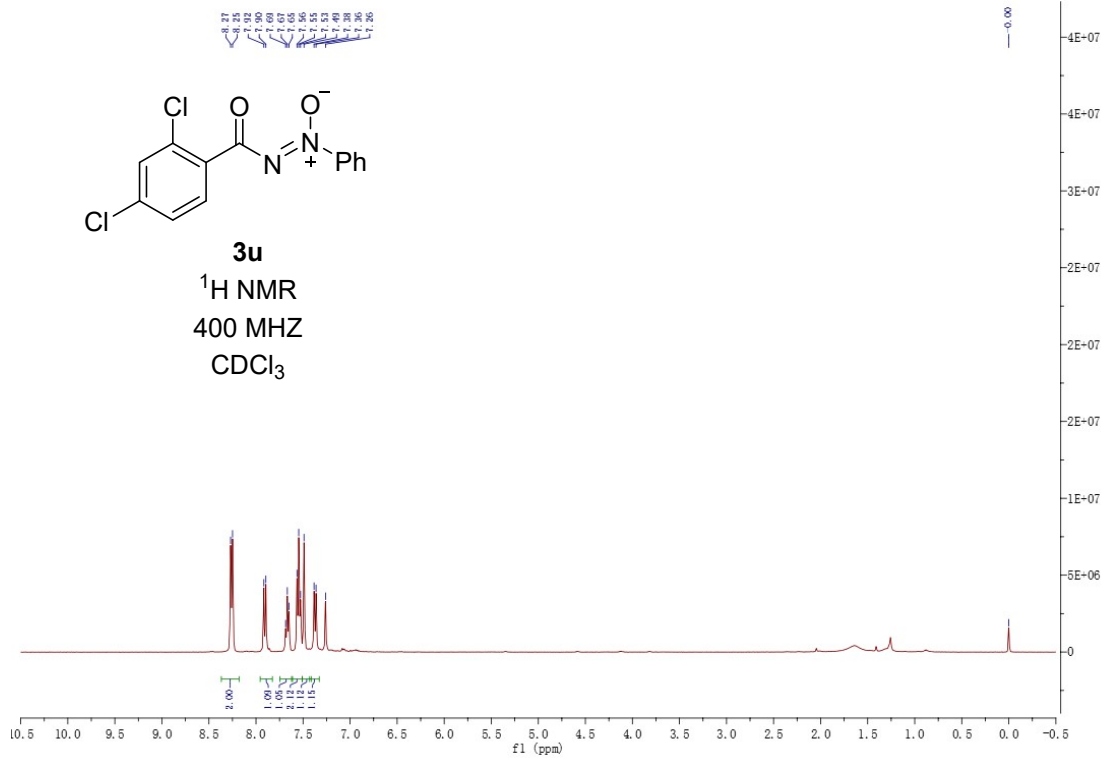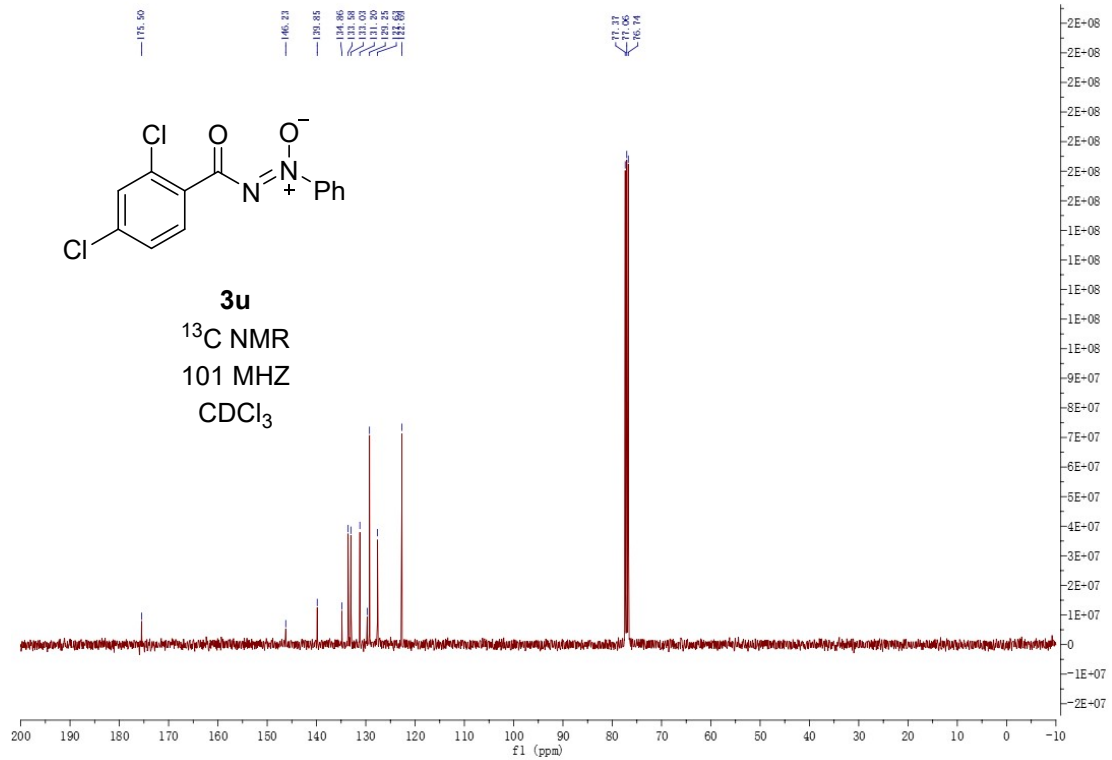

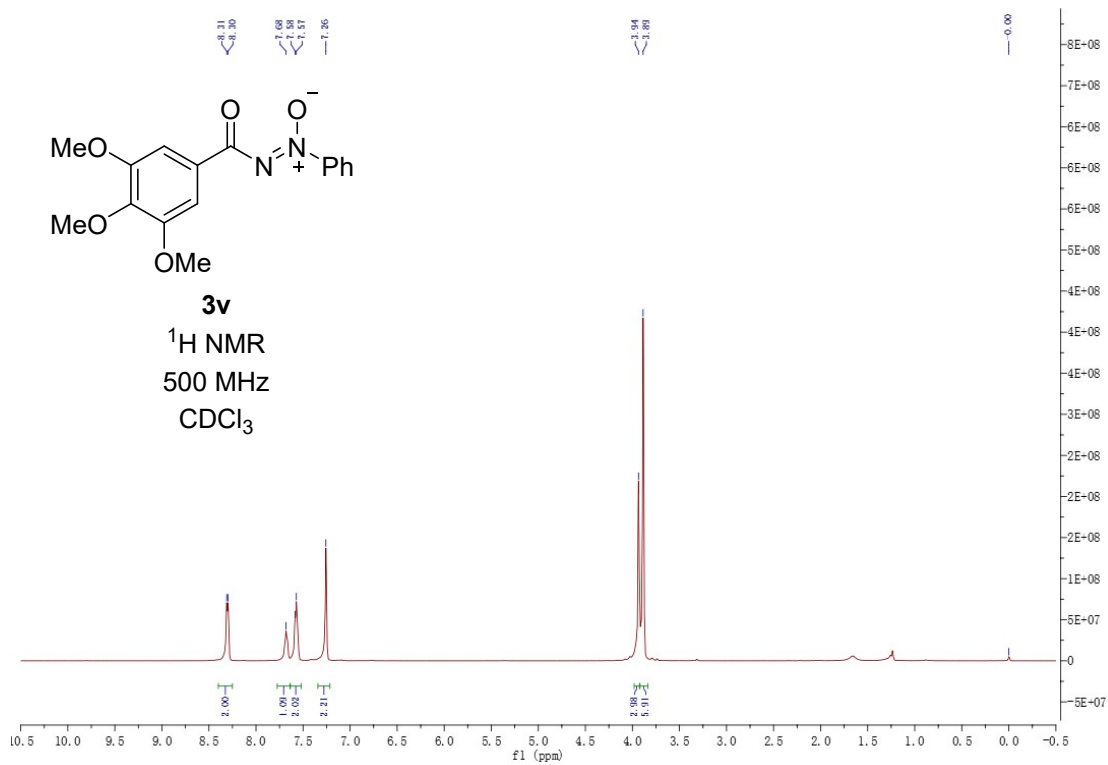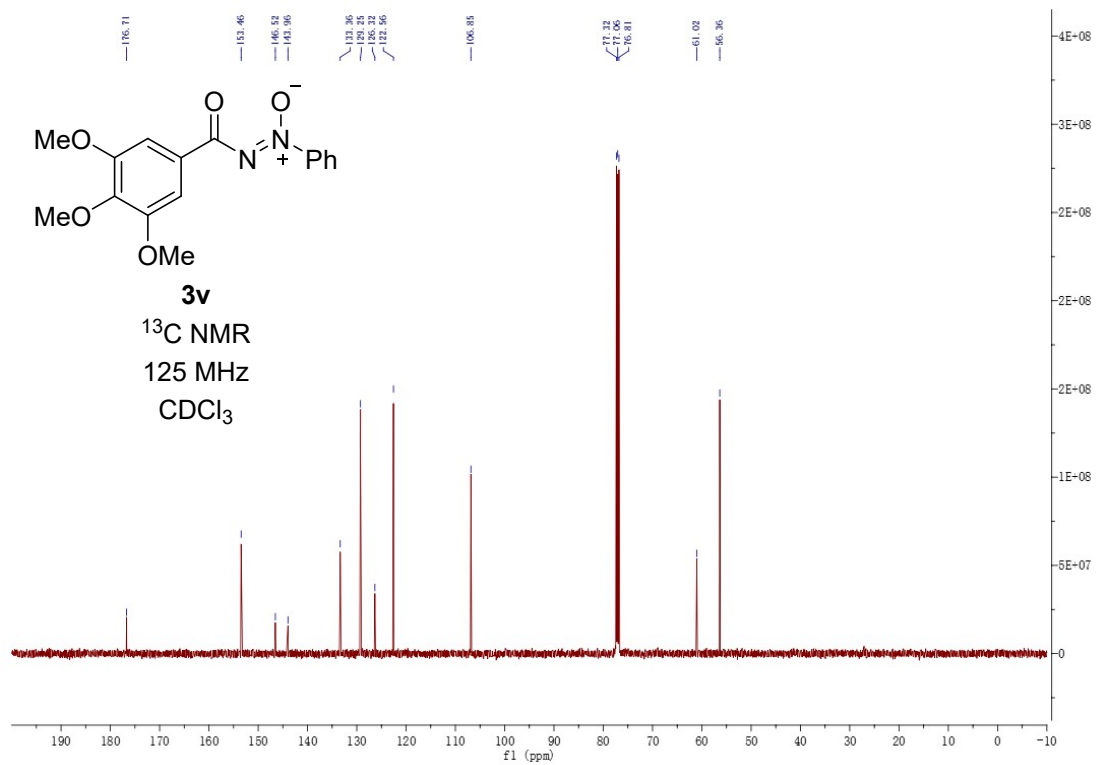

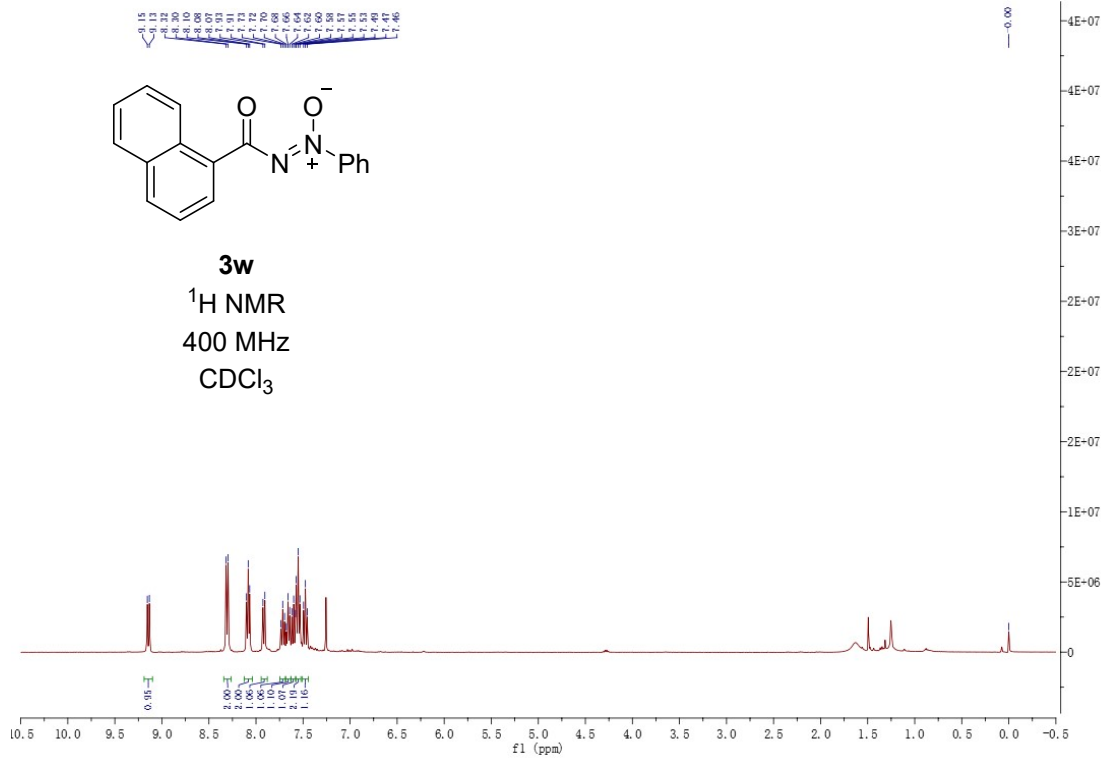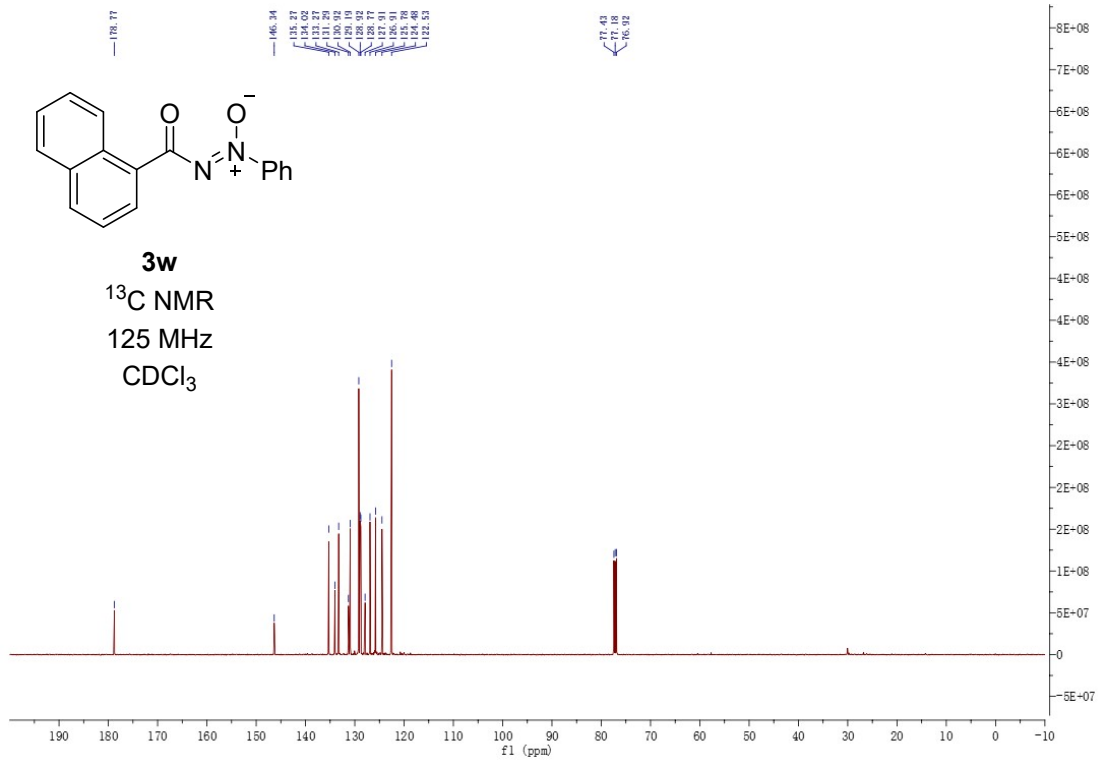



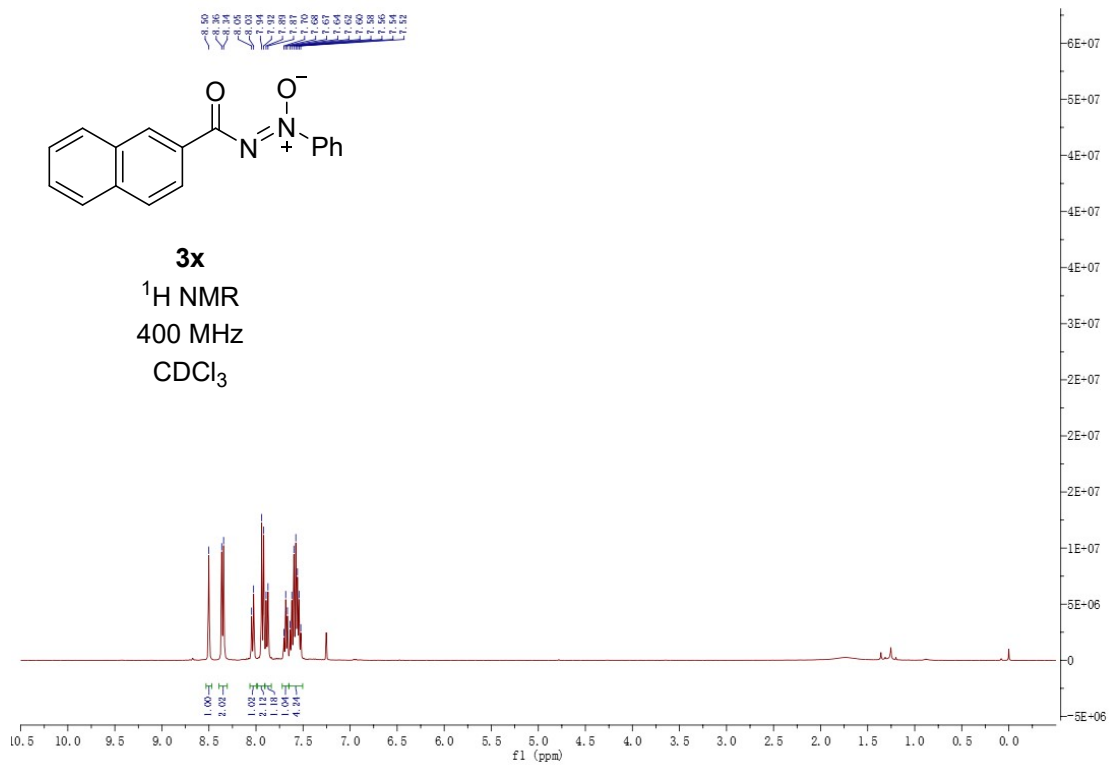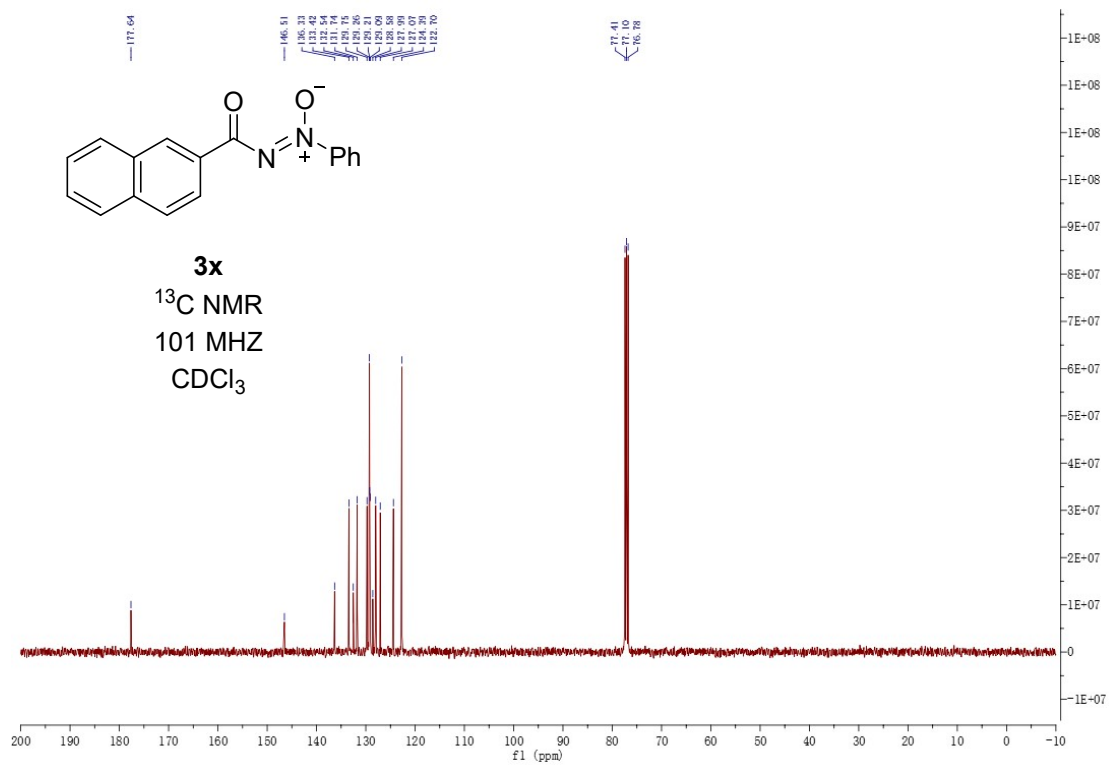

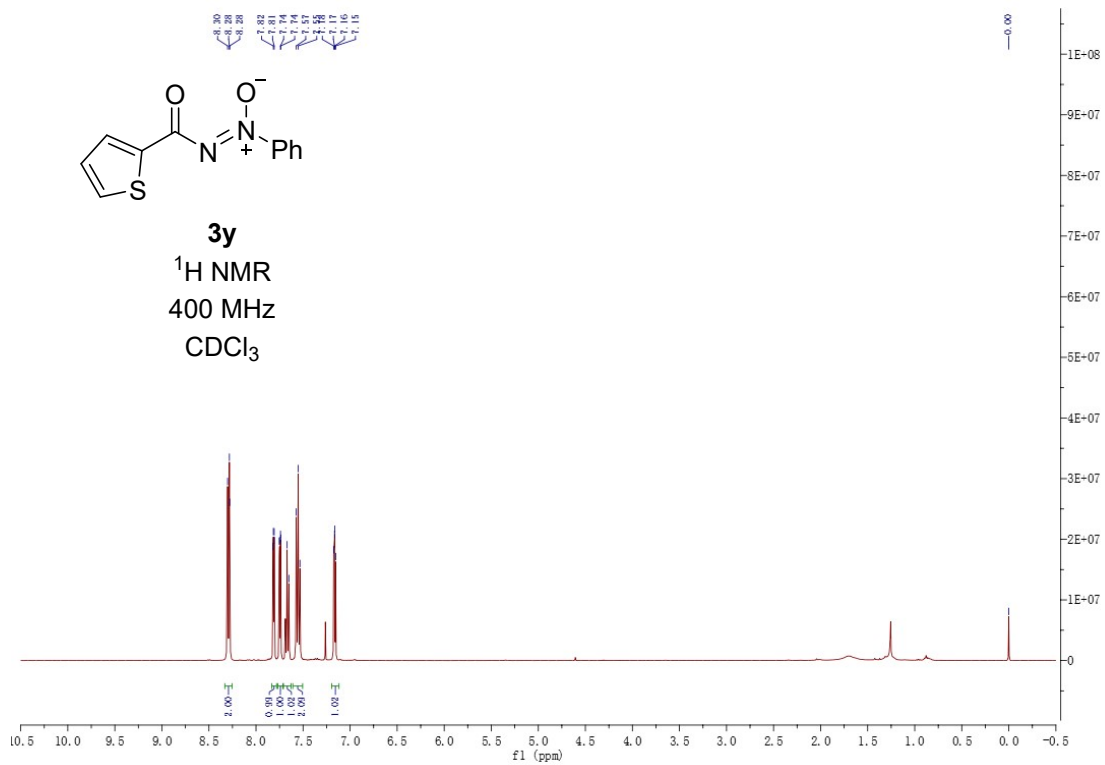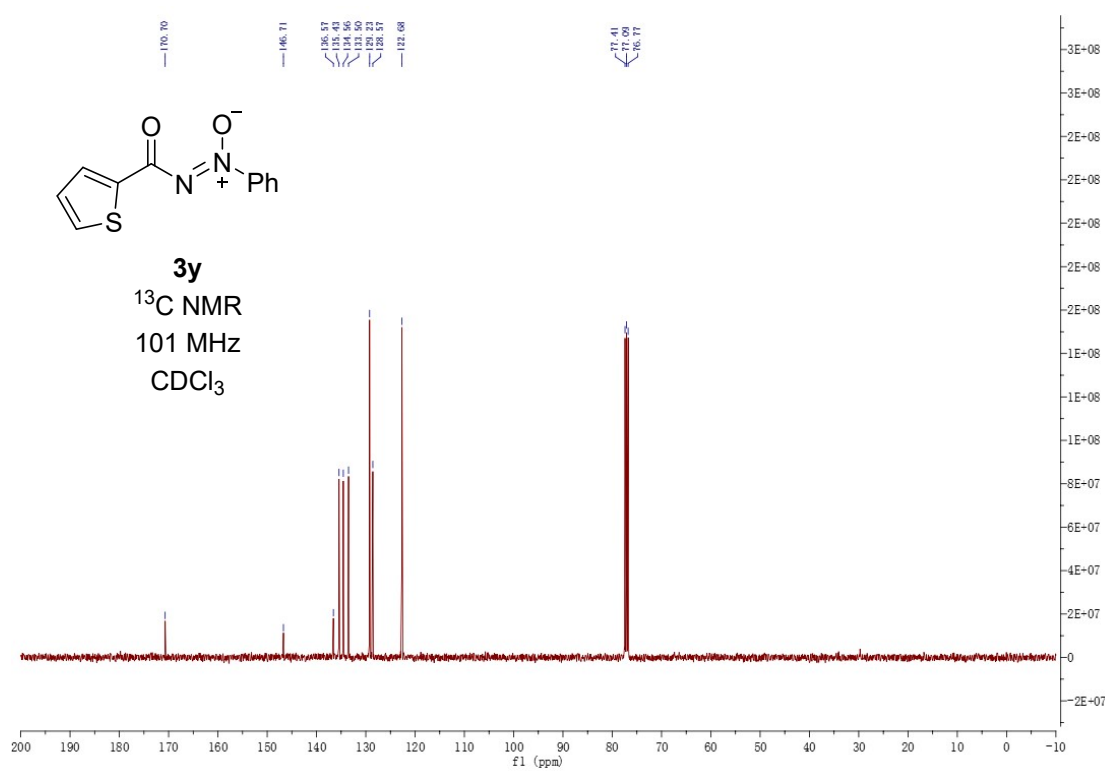

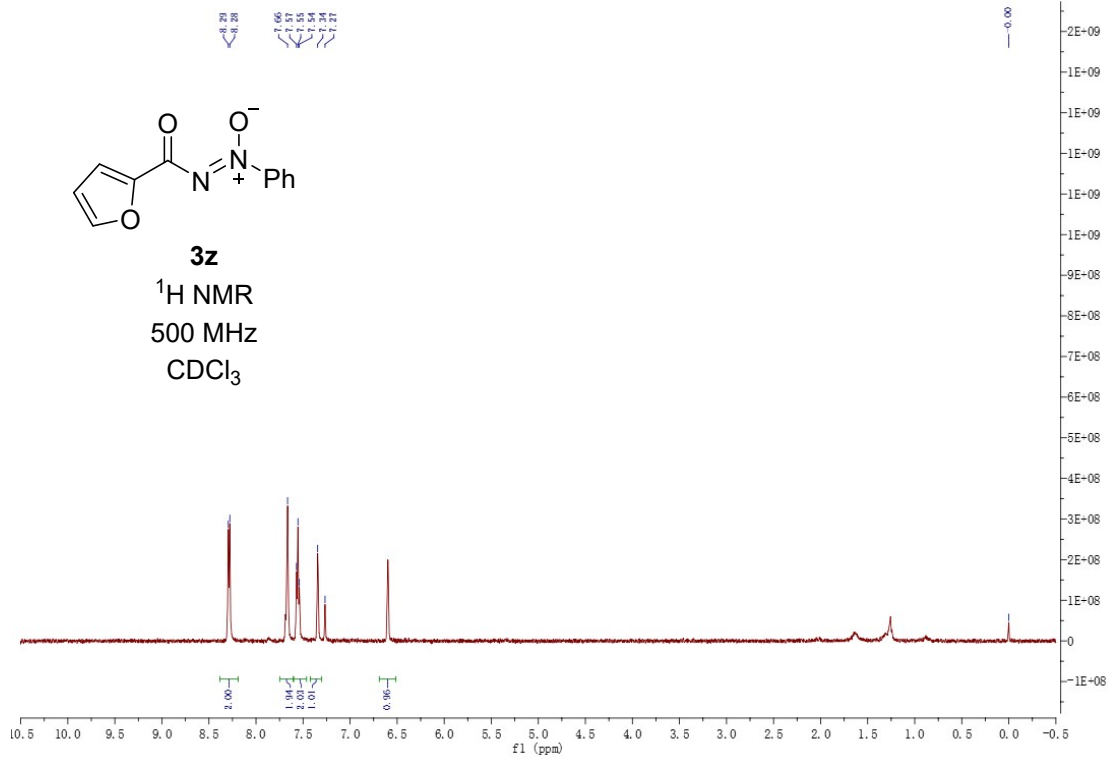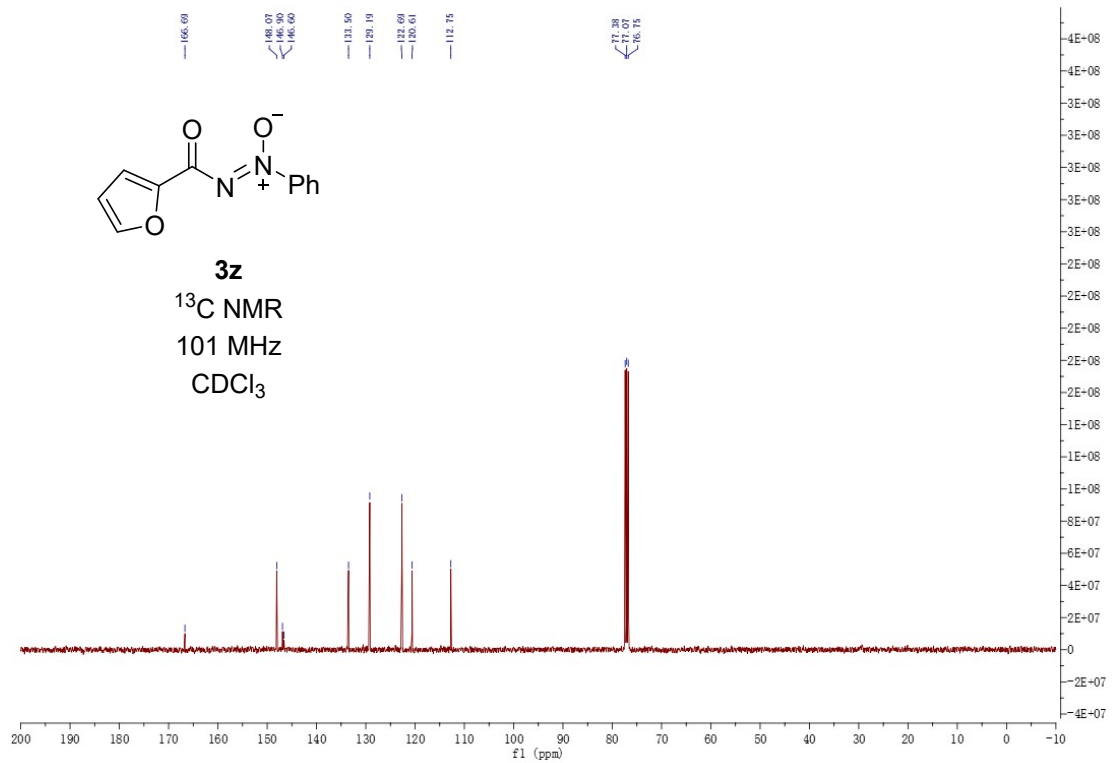

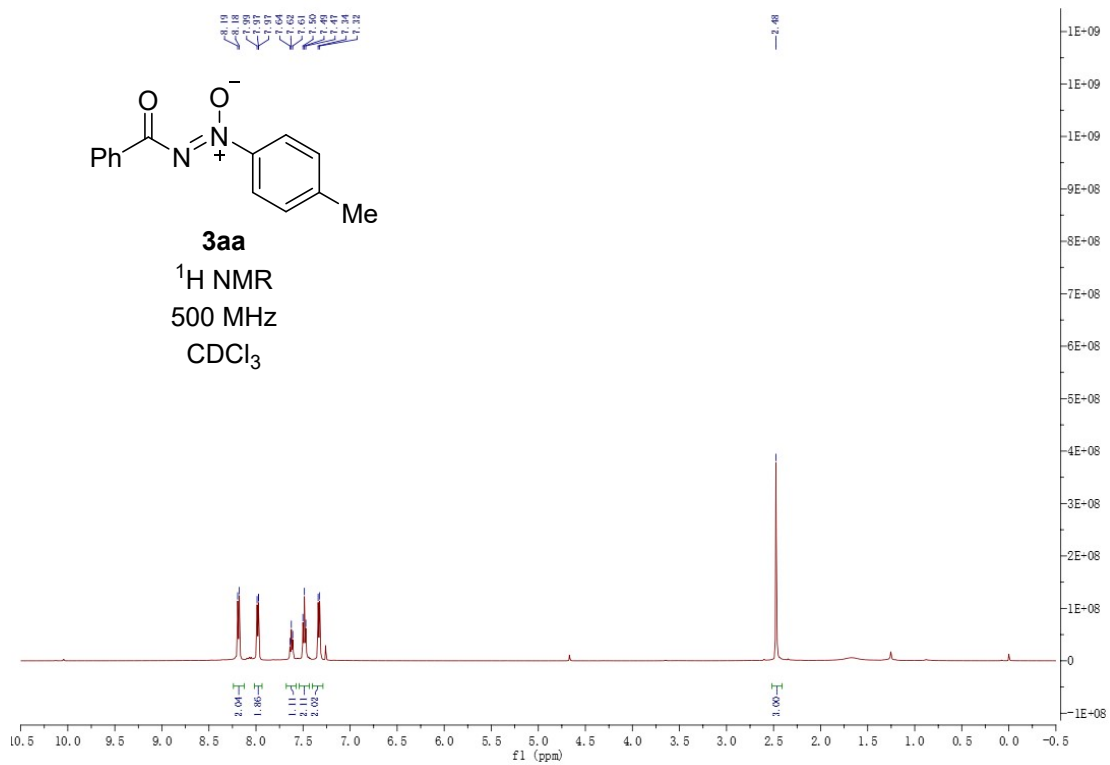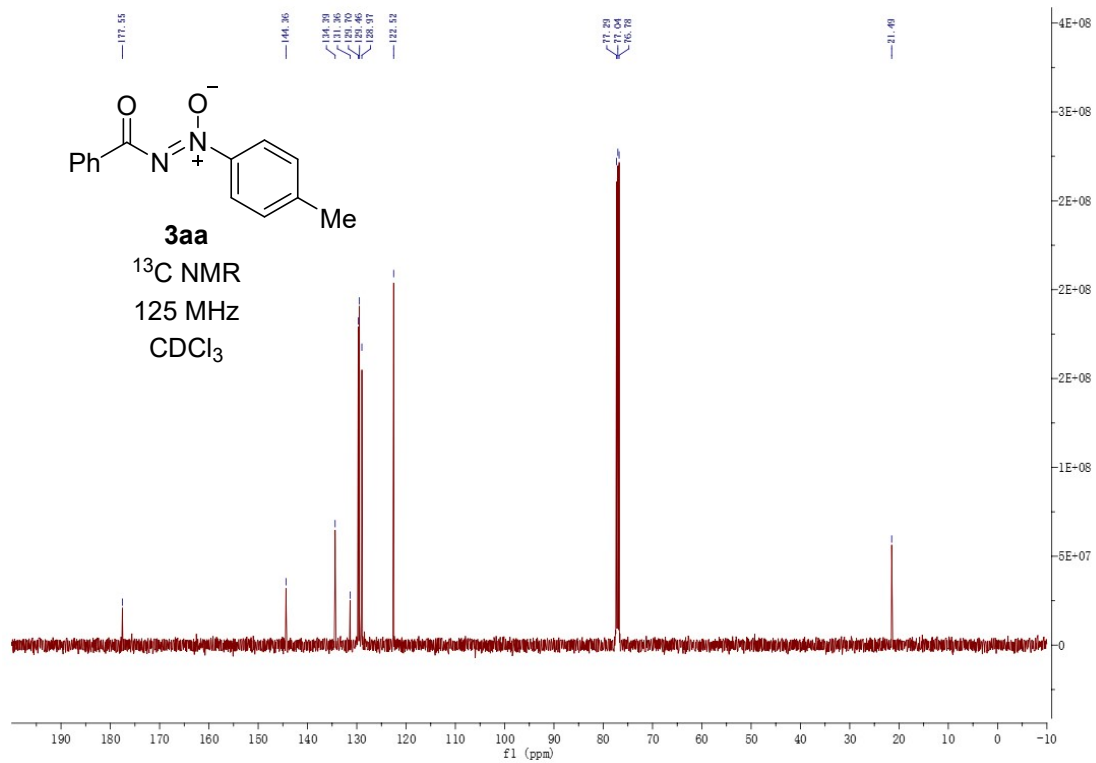

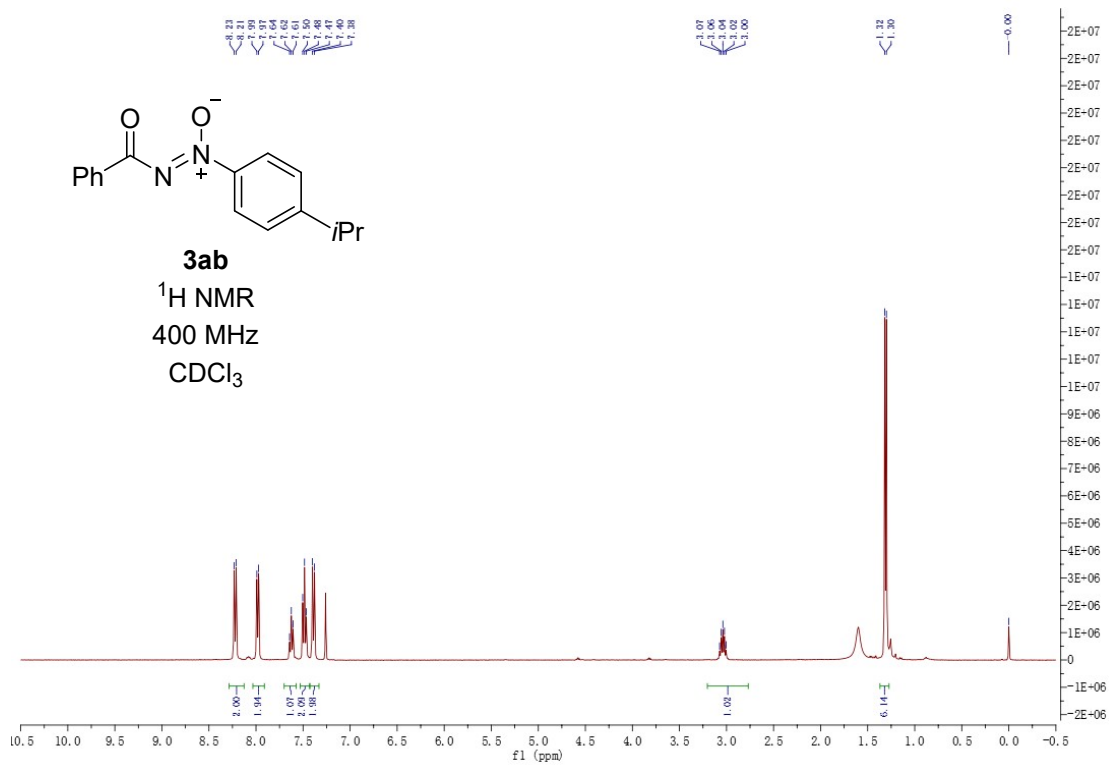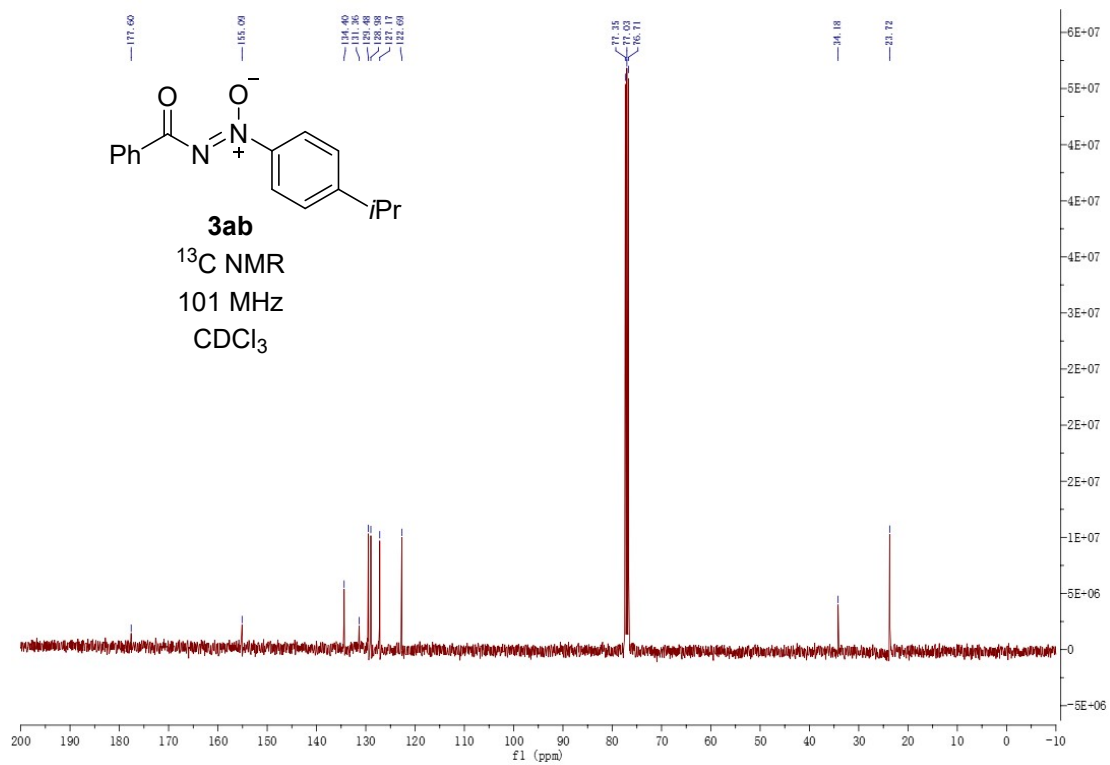

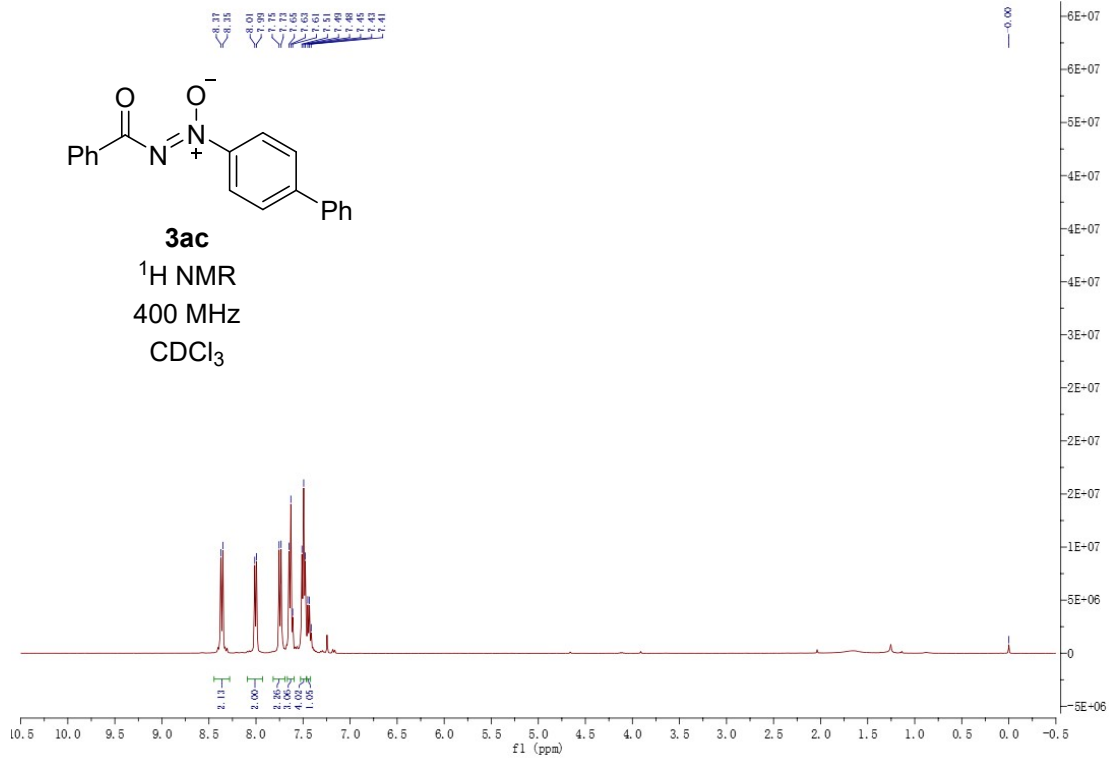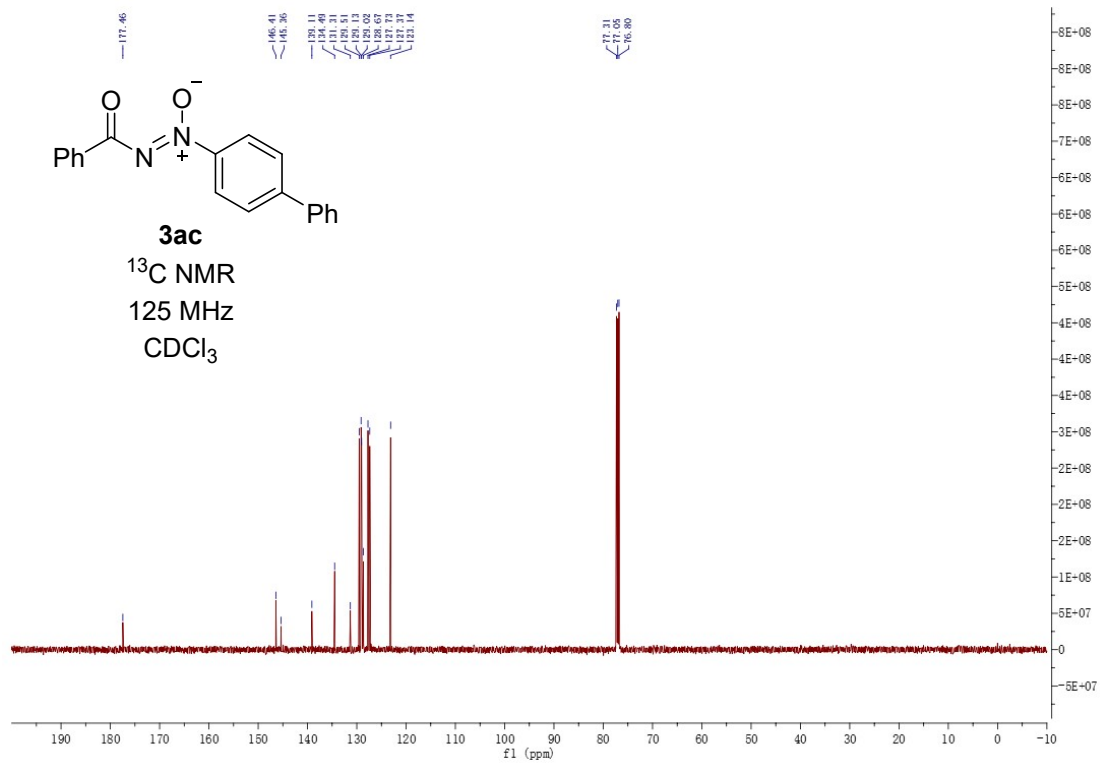

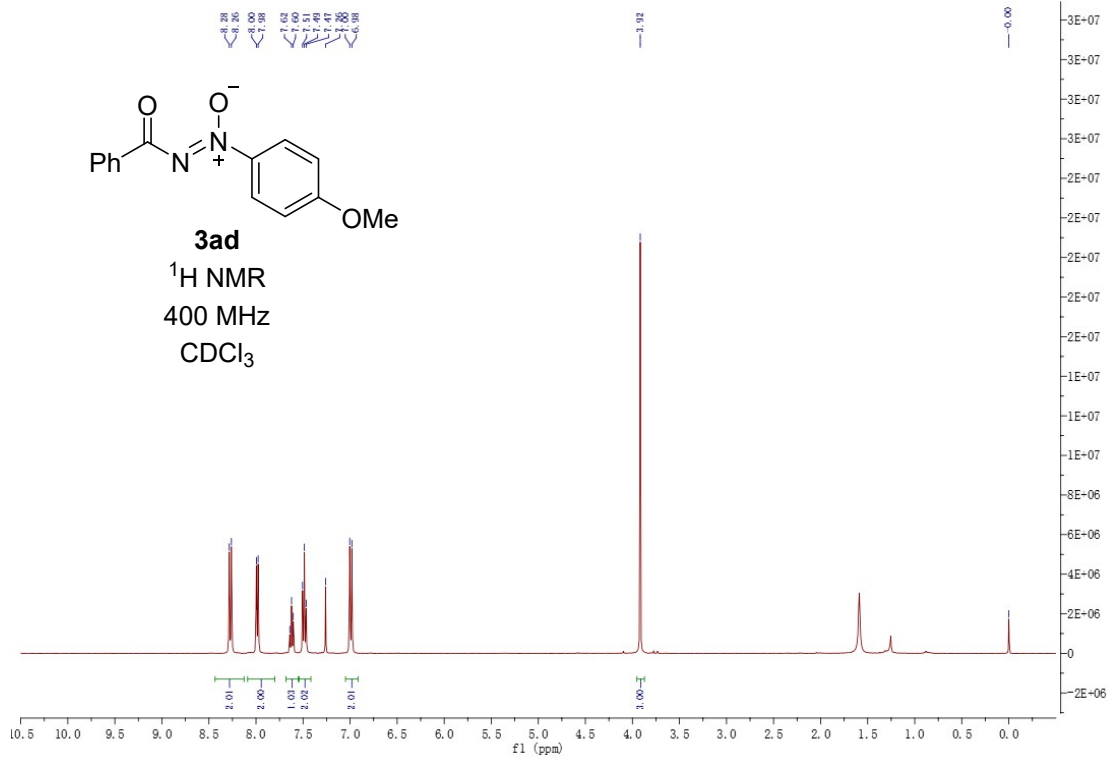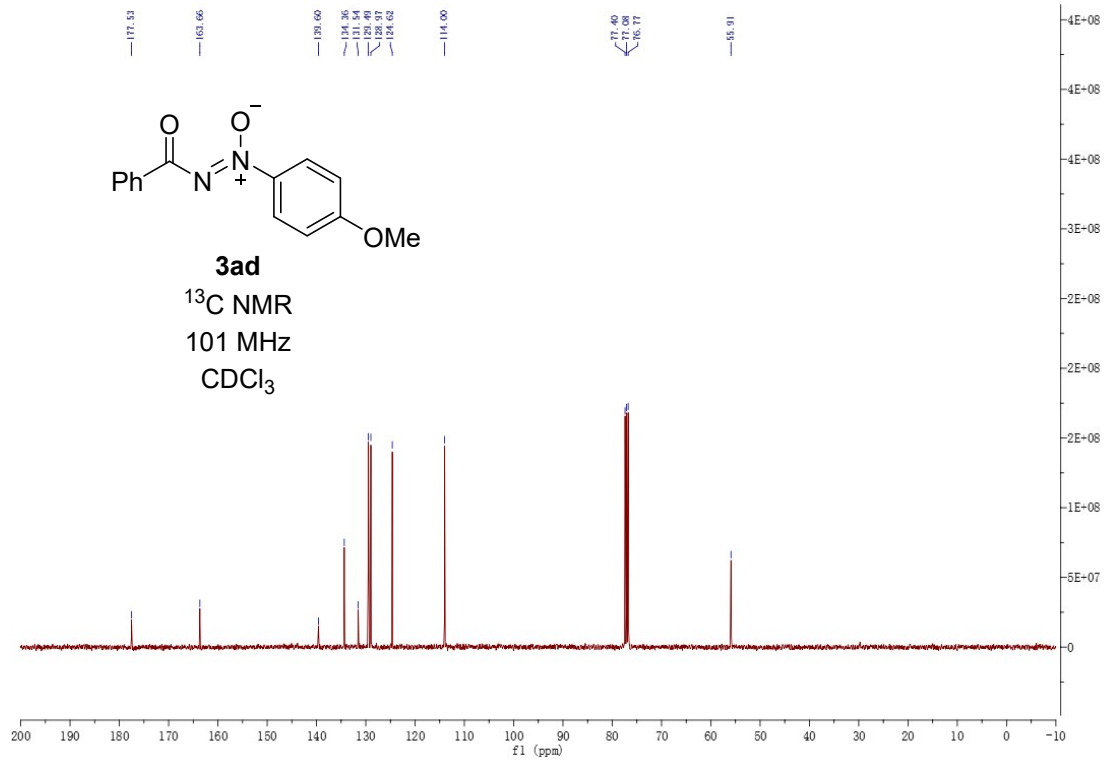

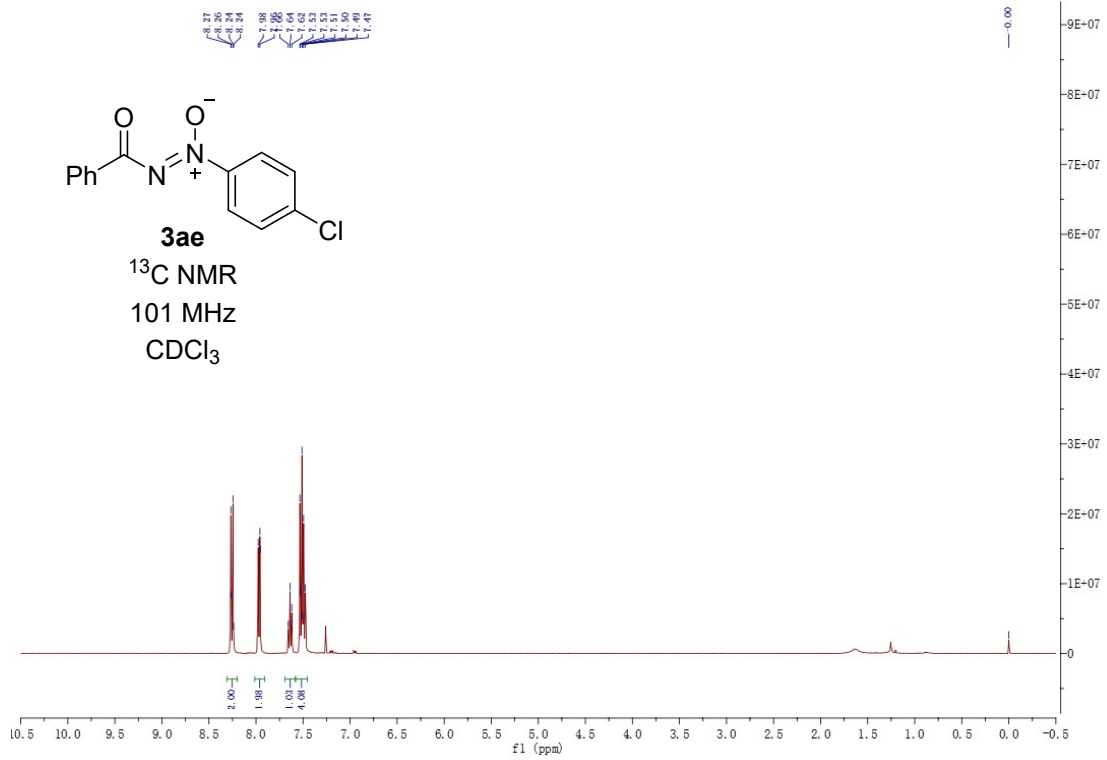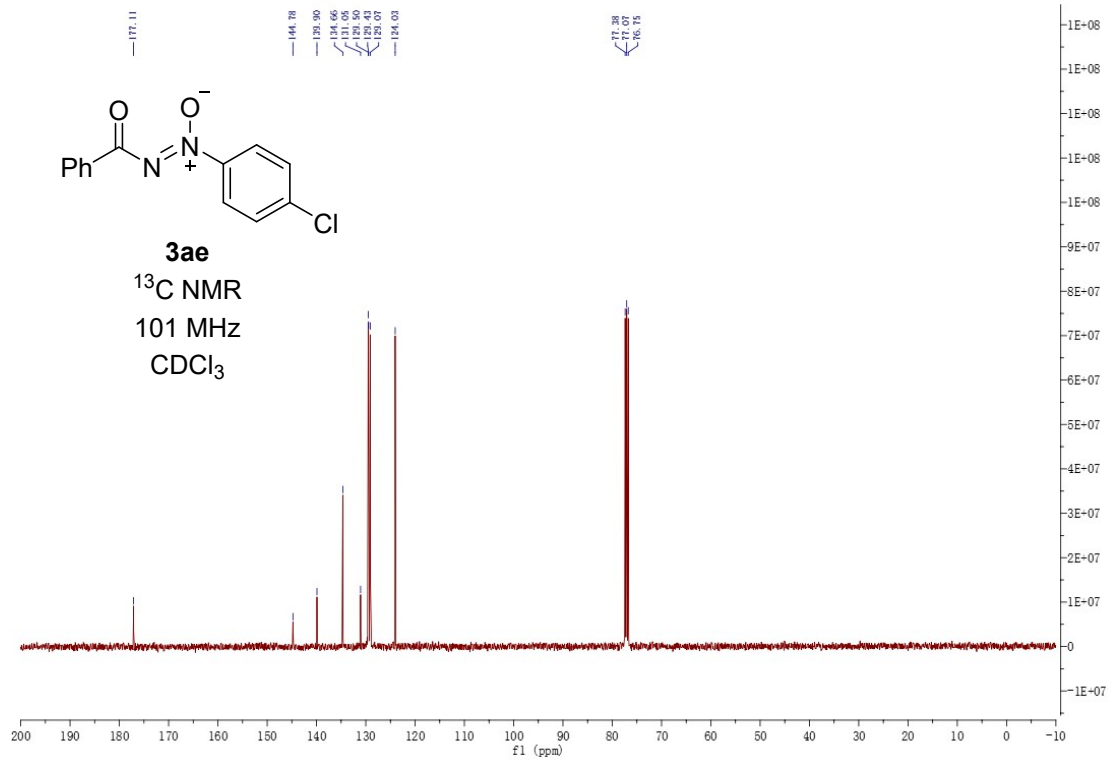



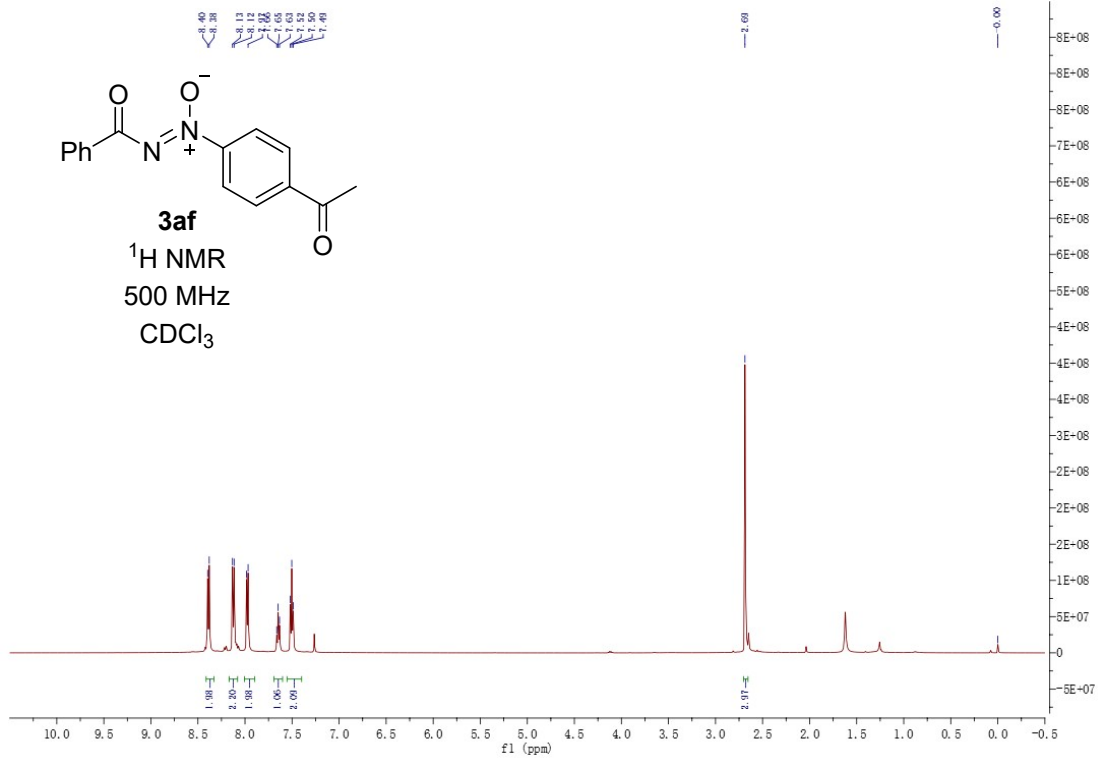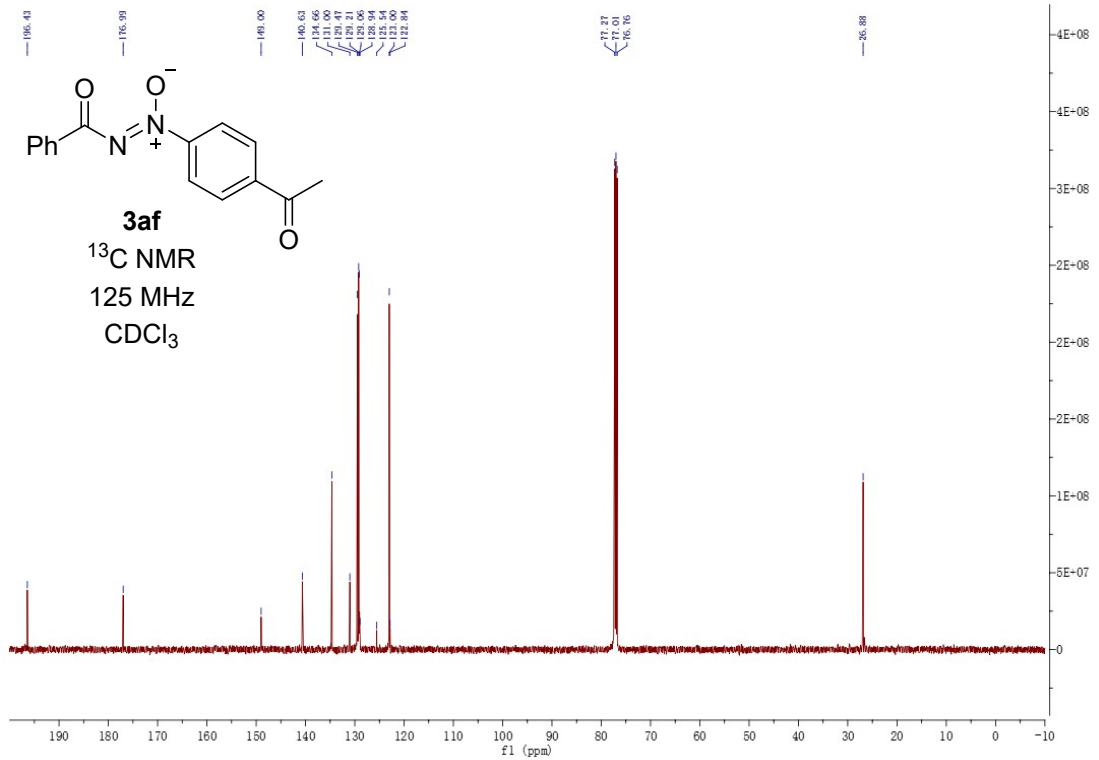

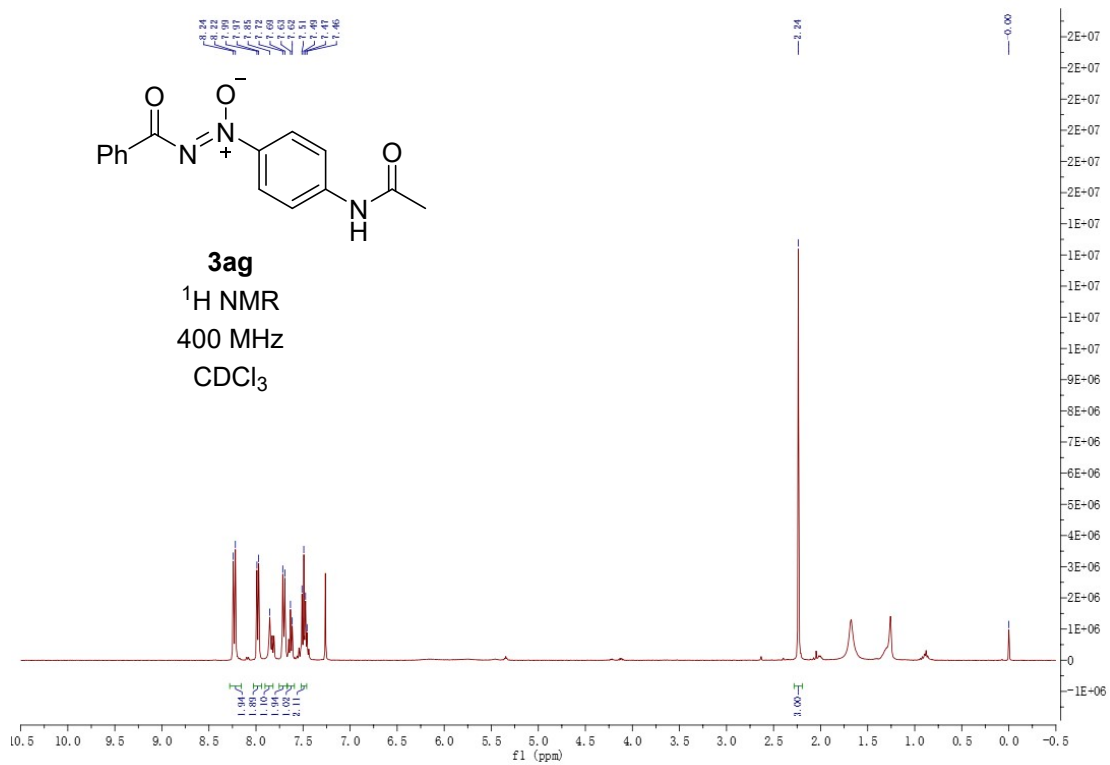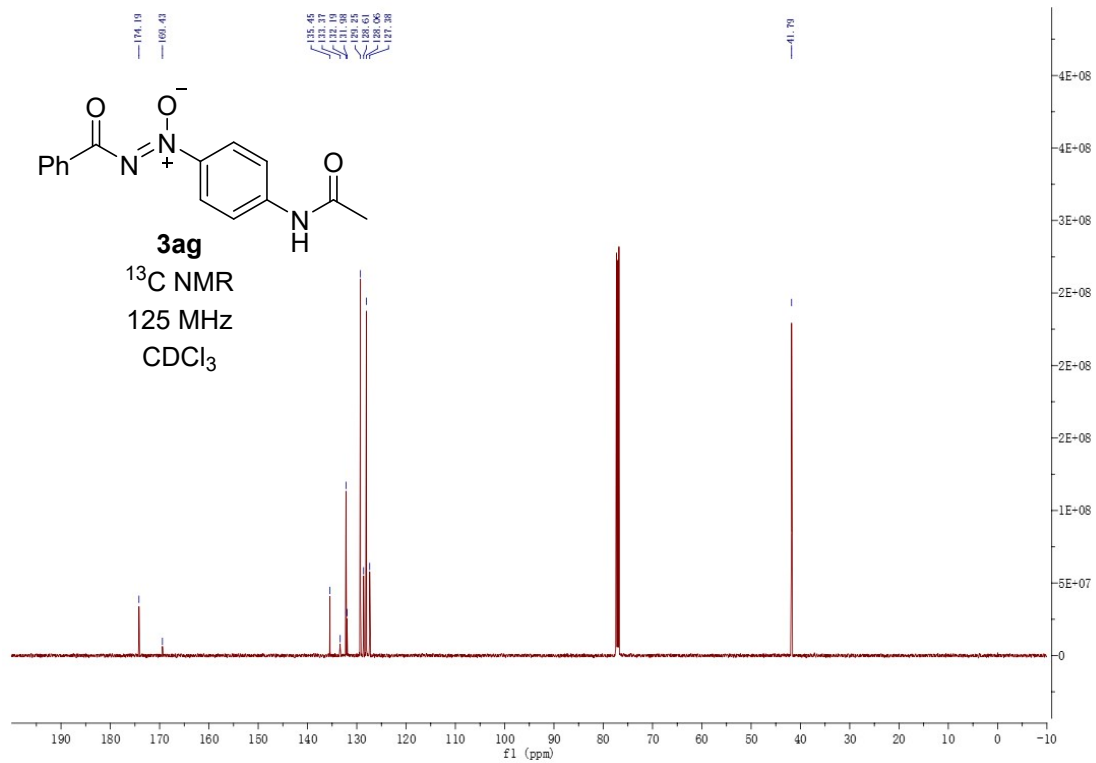

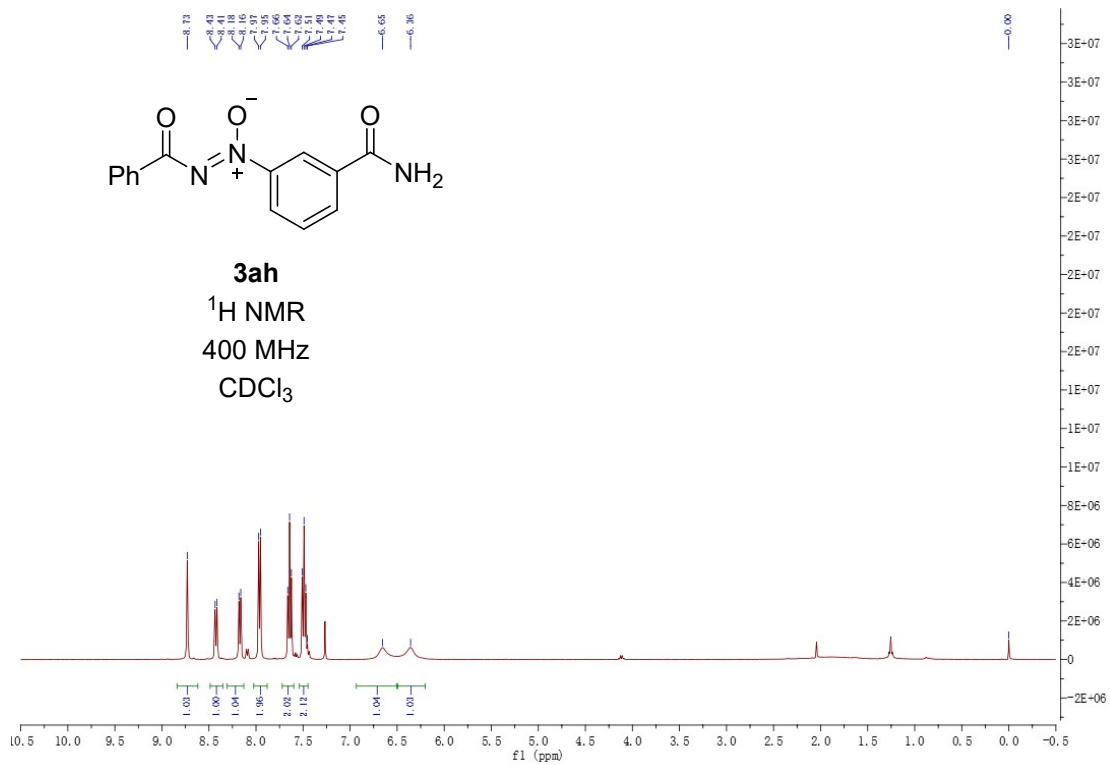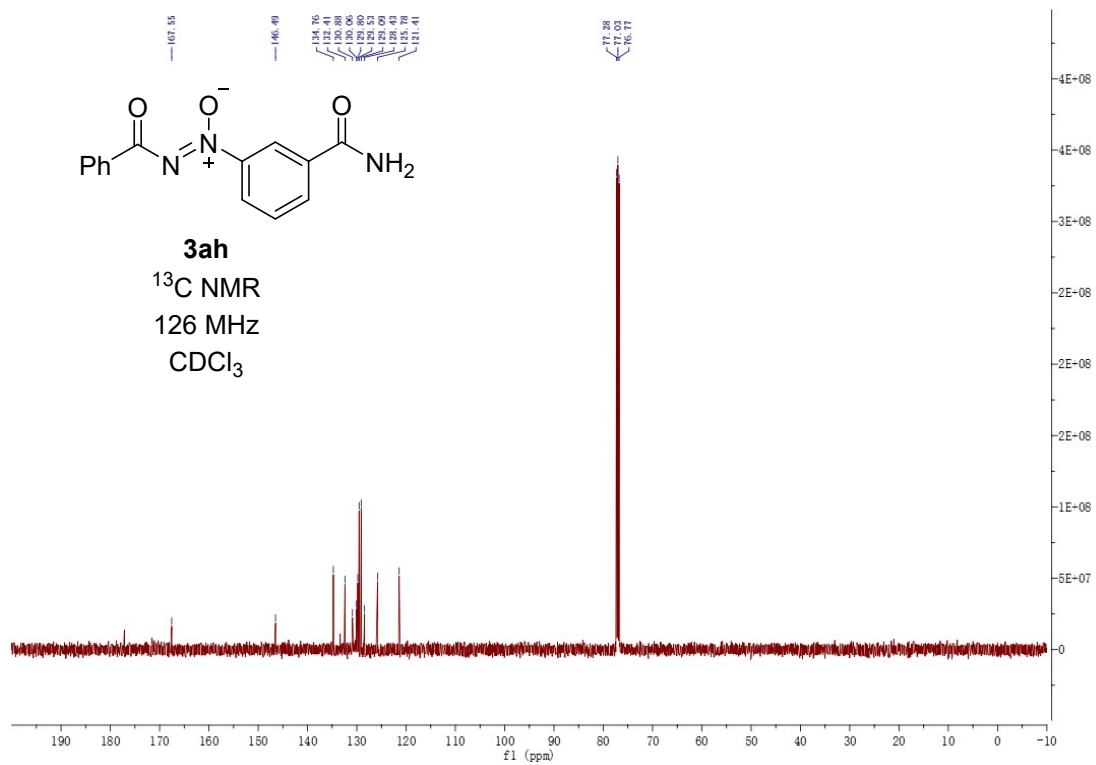

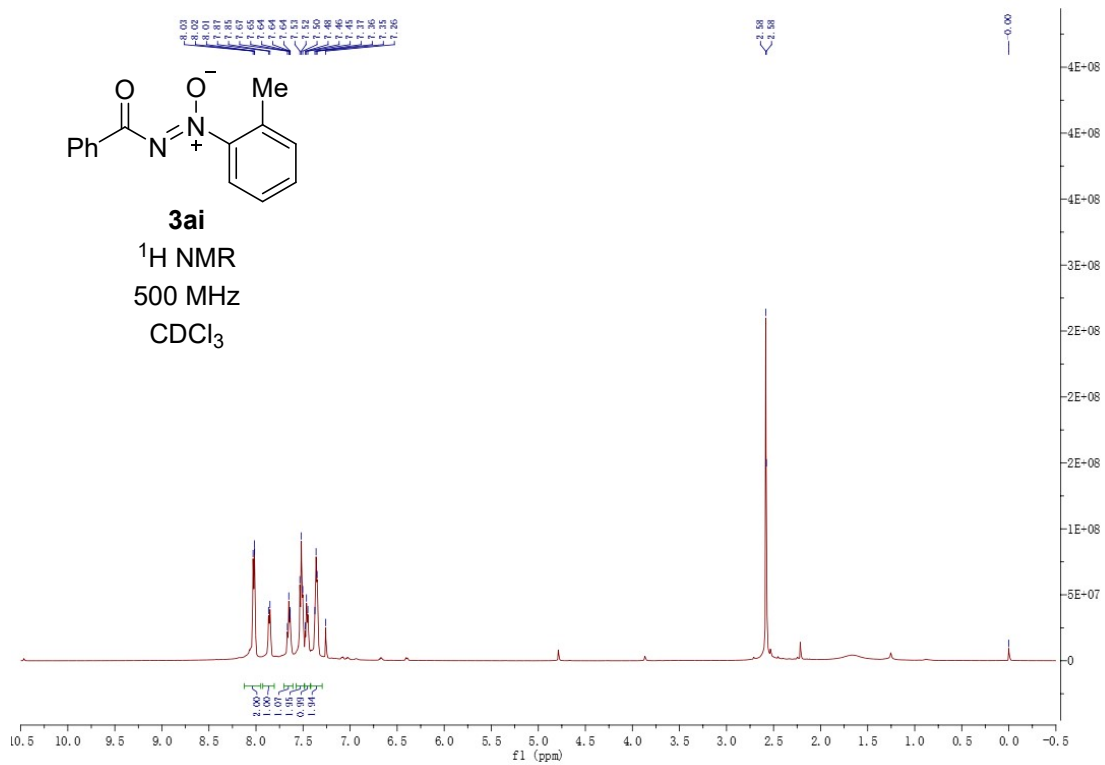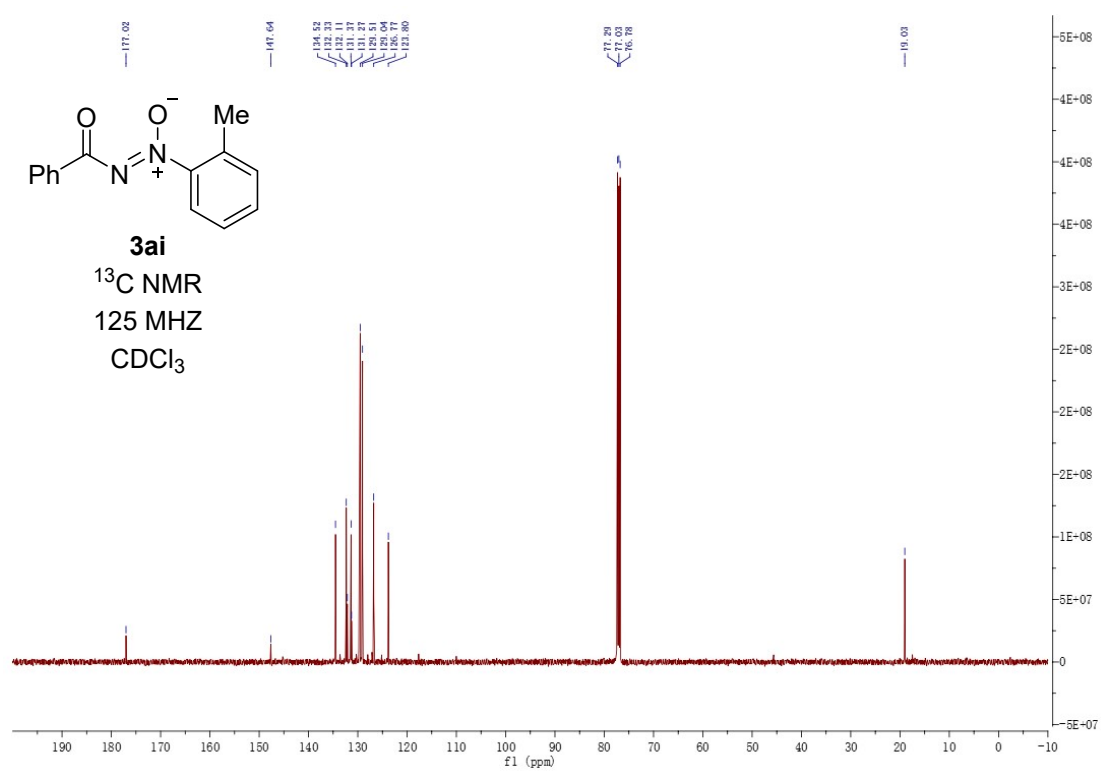

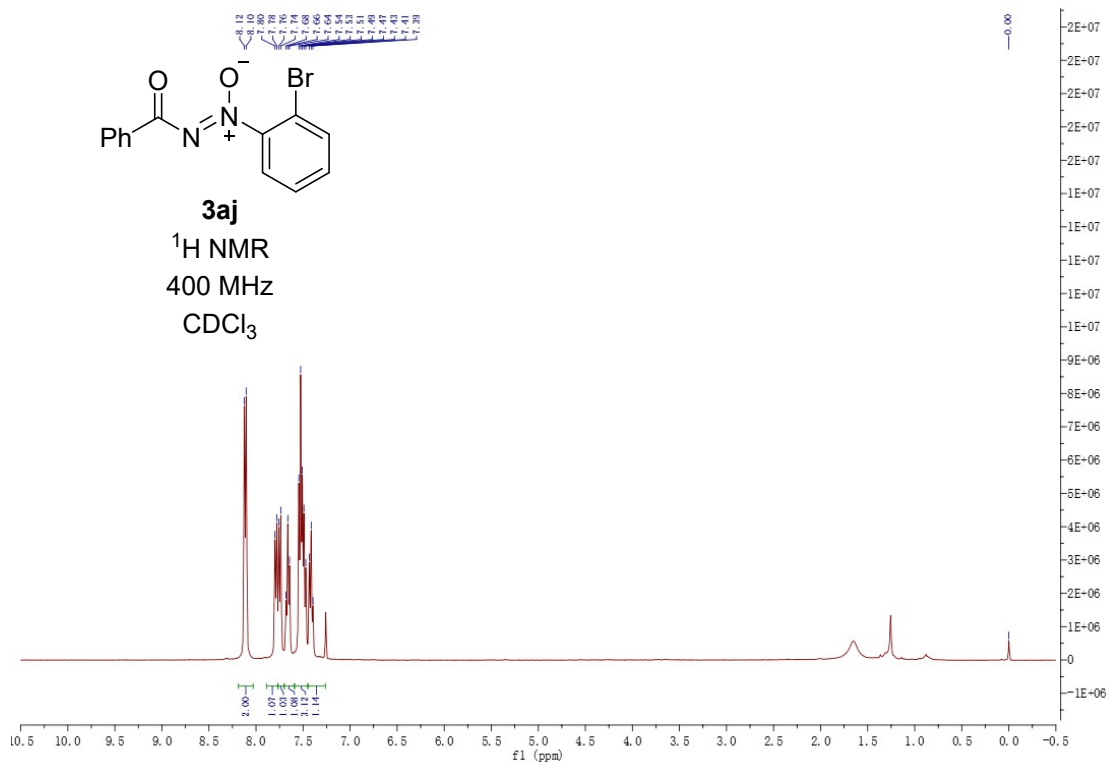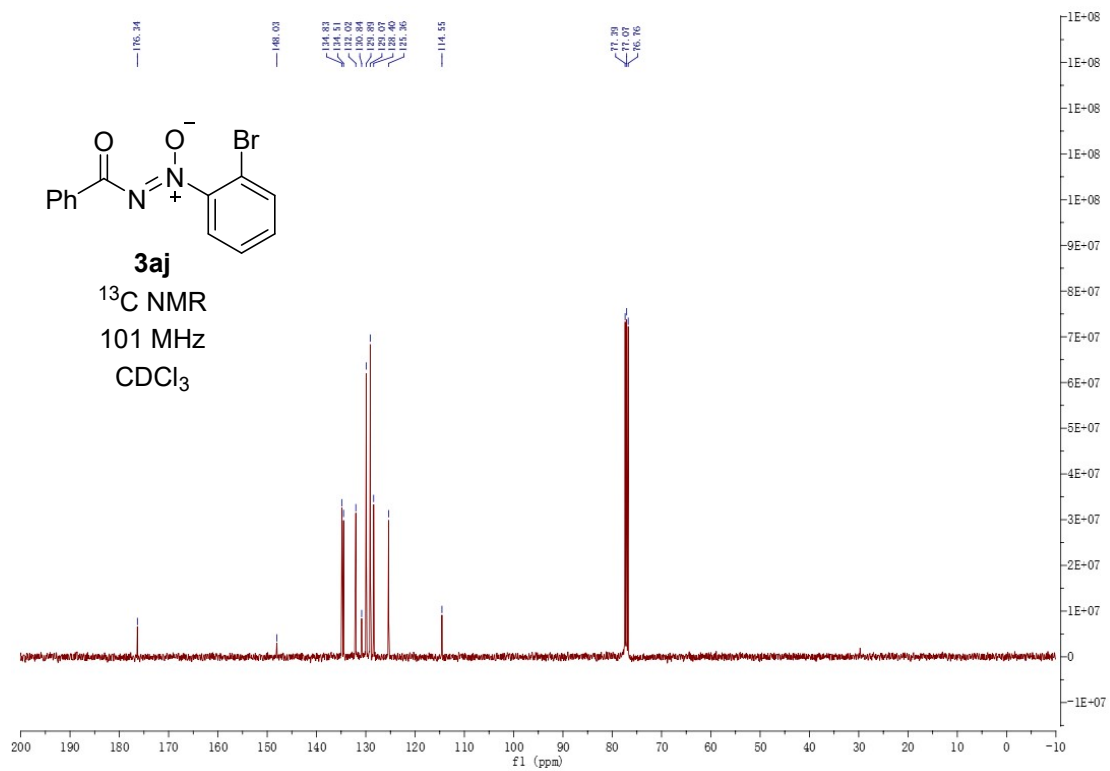

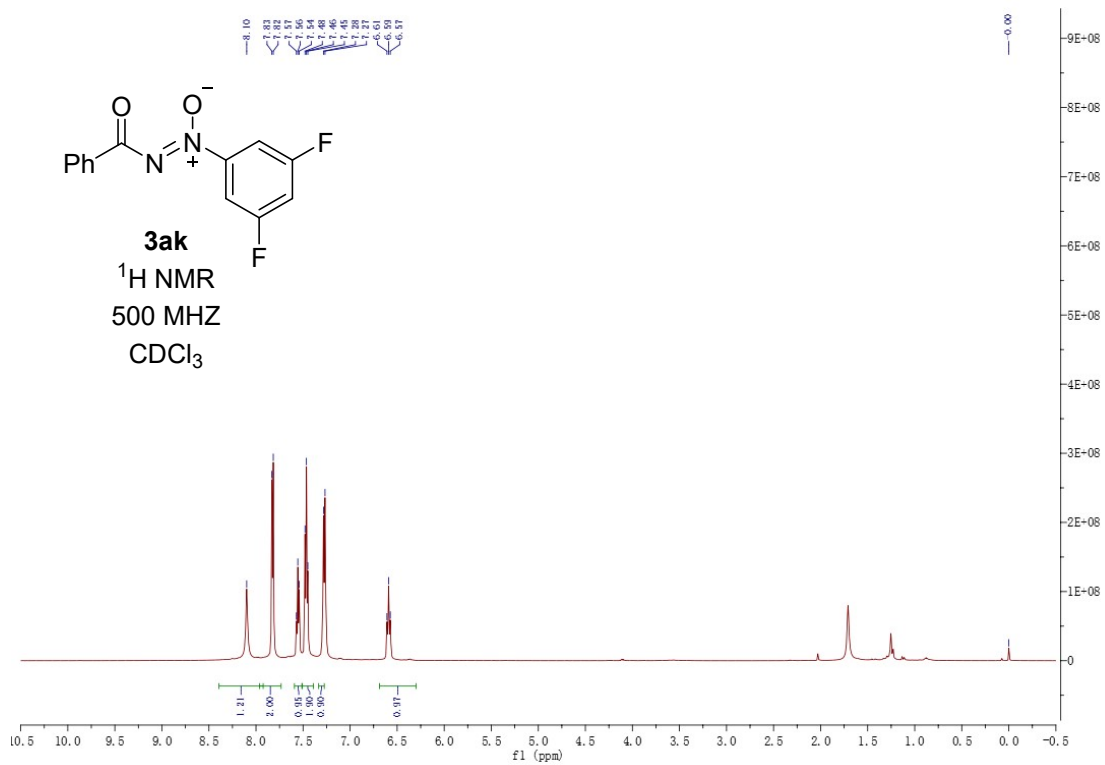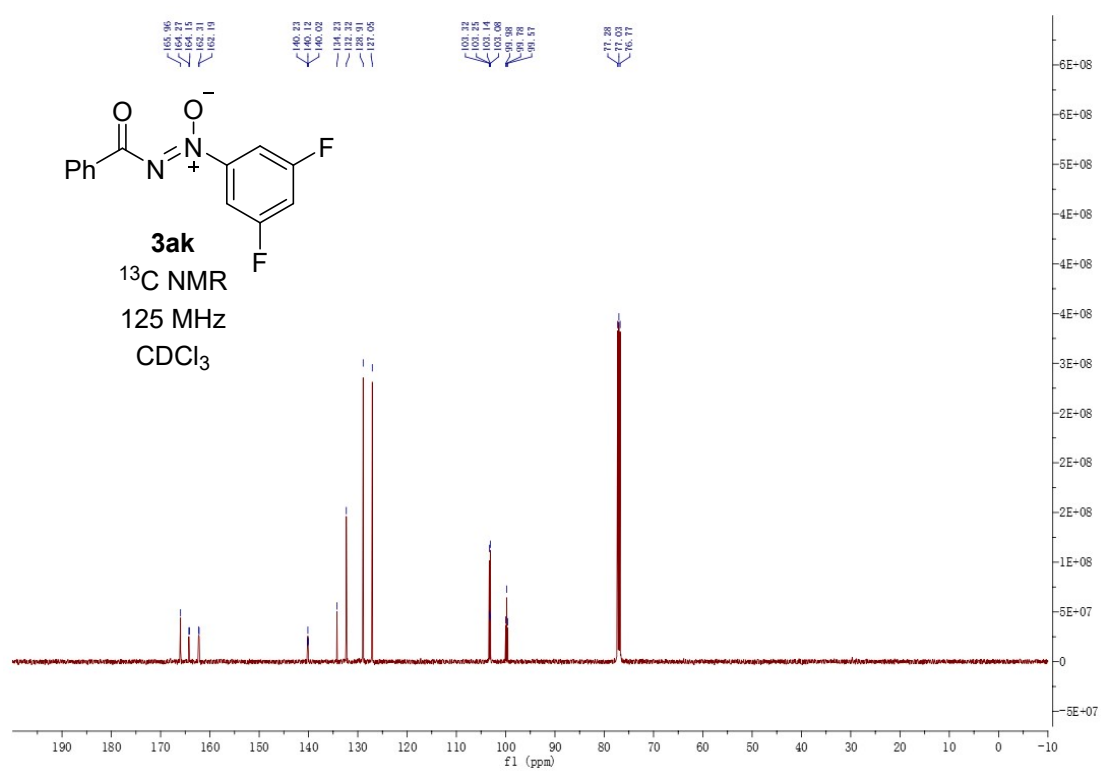

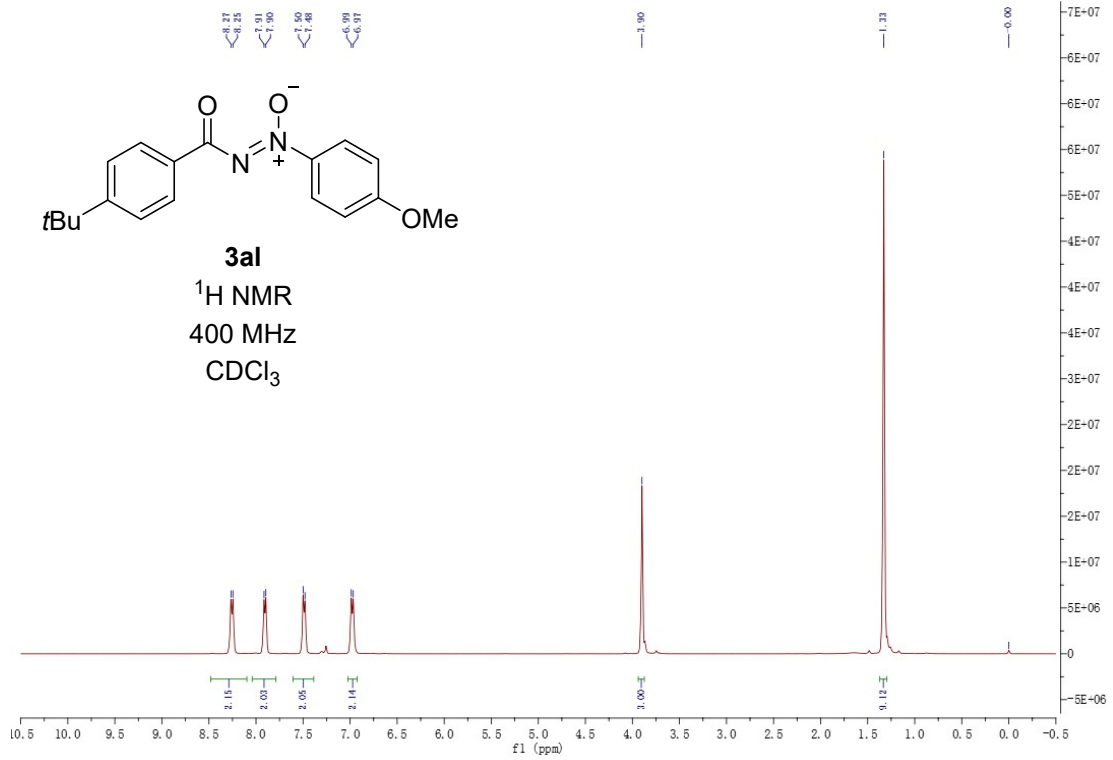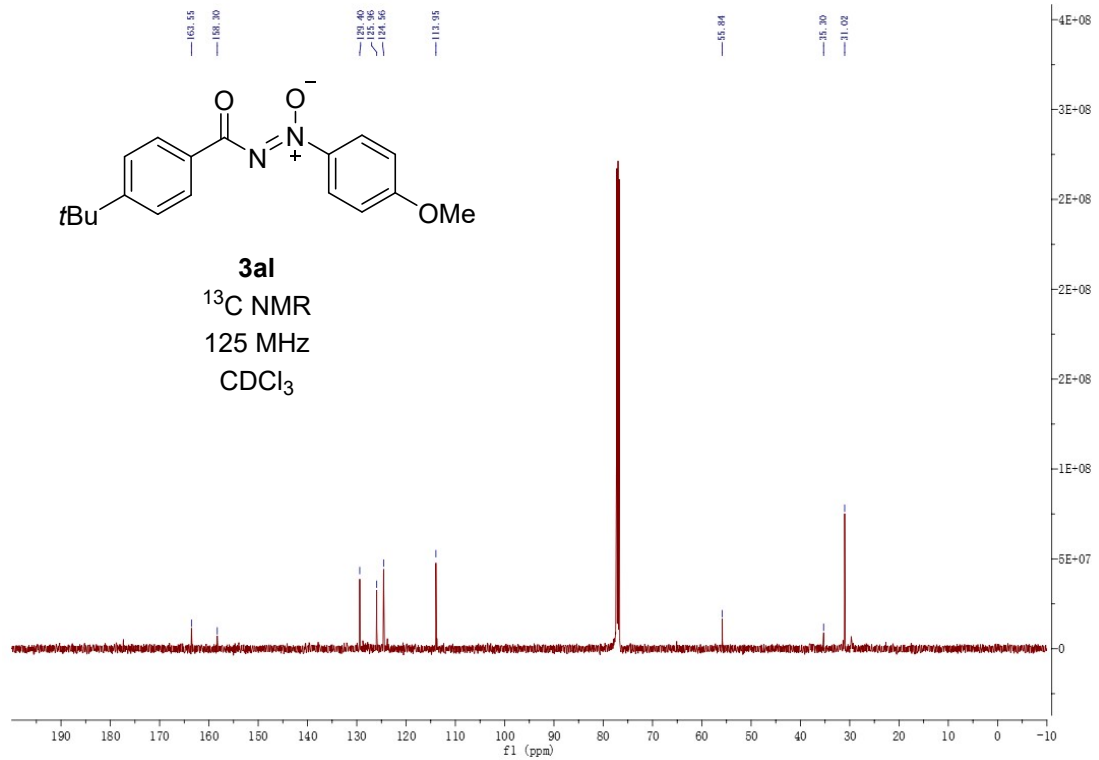

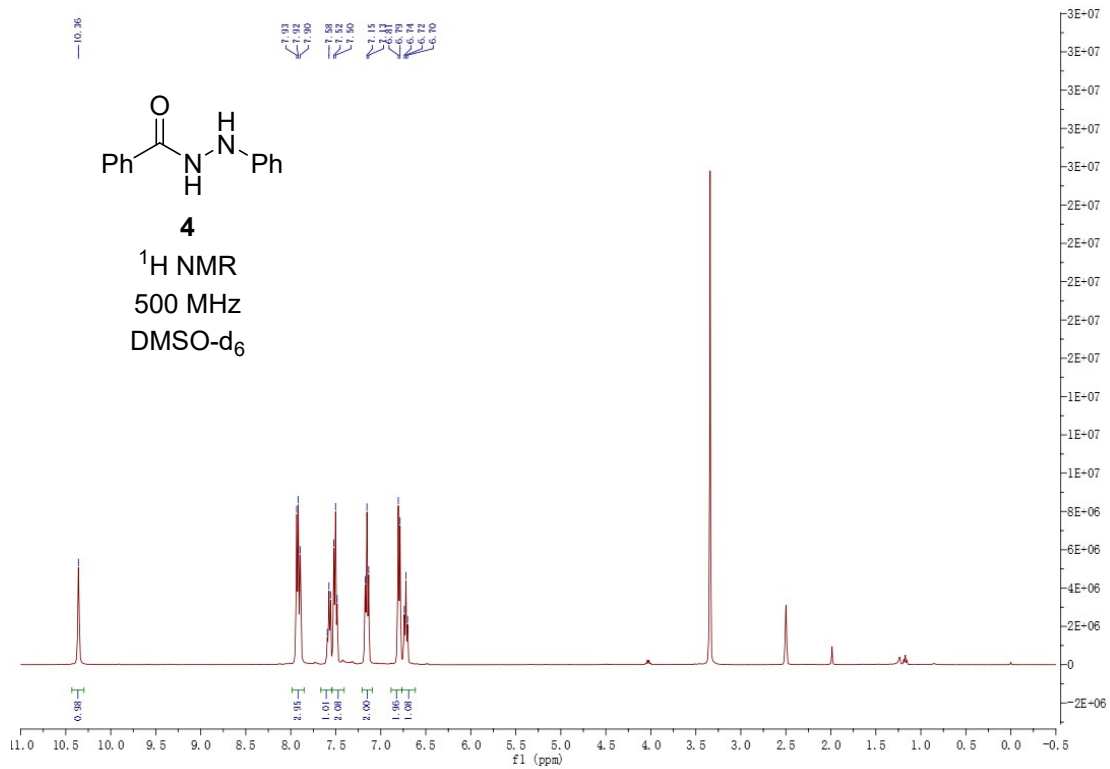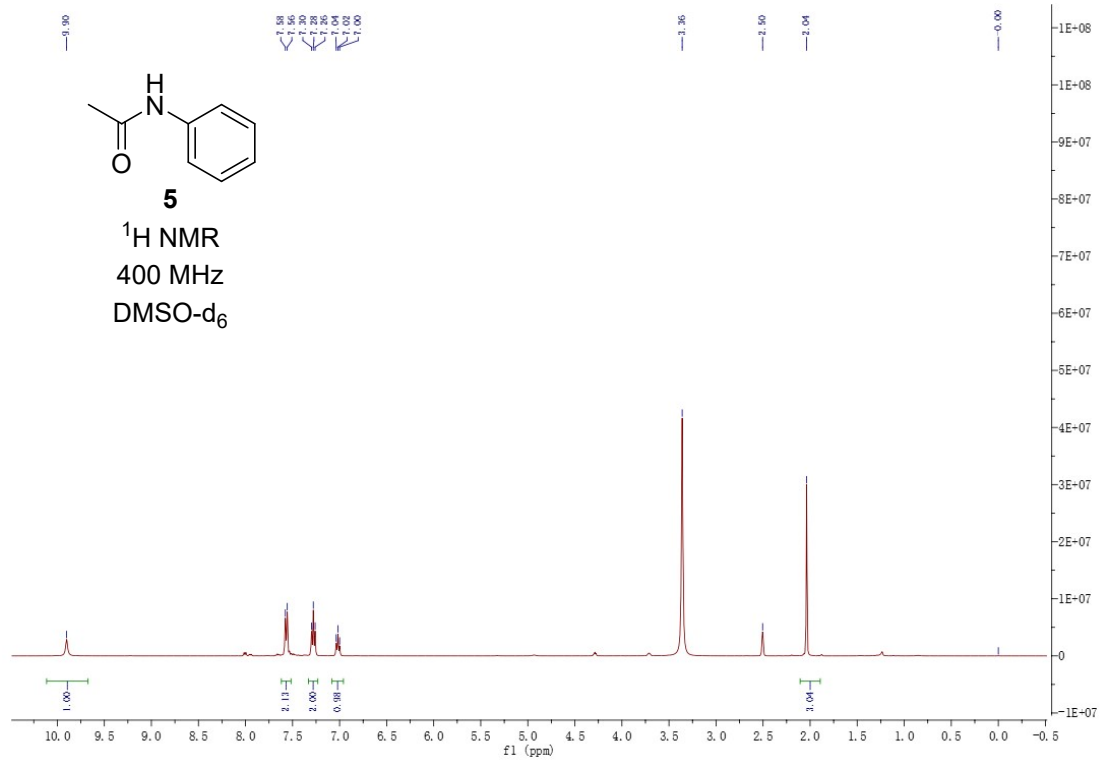



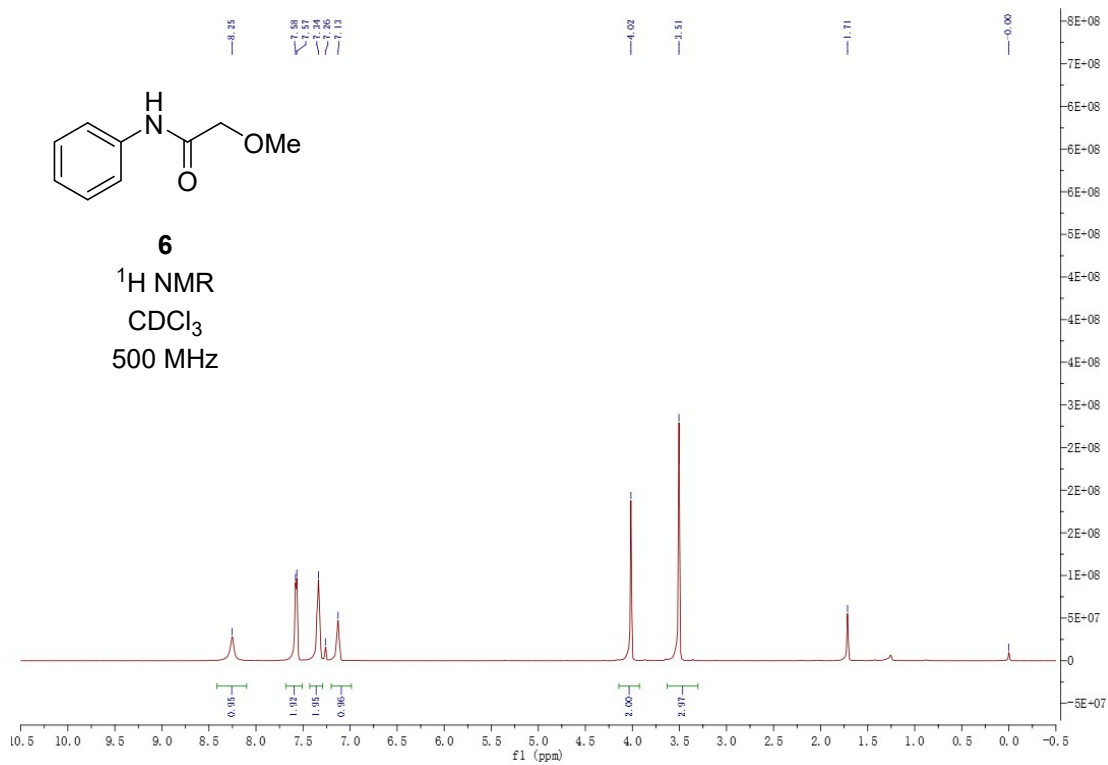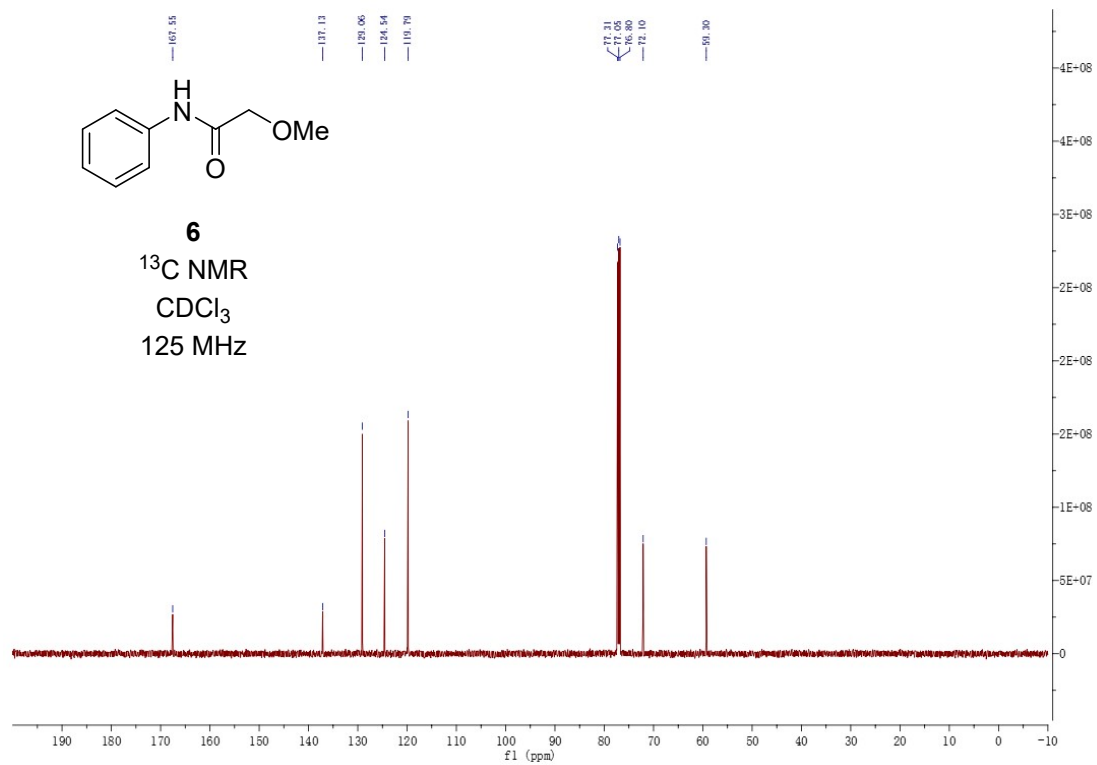

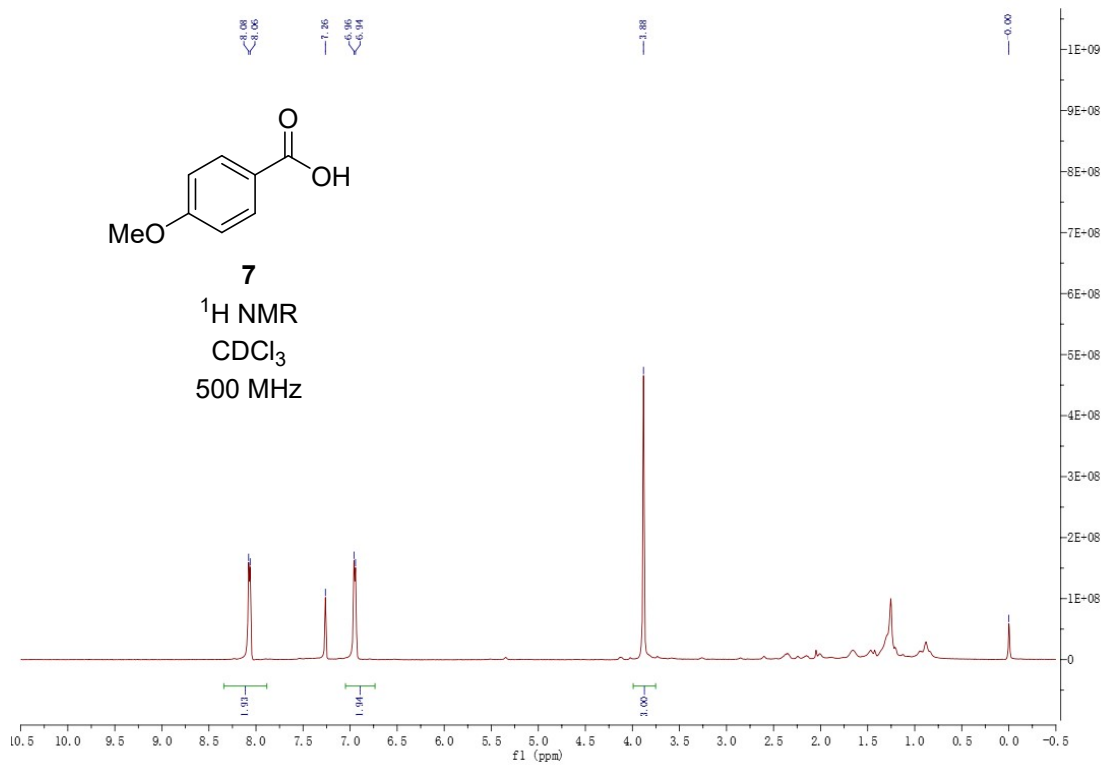

Supplement: d4qo00137k1.pdf [file d4qo00137k1.pdf]
